# Supplementary material for: The Search for New Antibacterial Agents among 1,2,3-Triazole Functionalized Ciprofloxacin and Norfloxacin Hybrids: Synthesis, Docking Studies, and Biological Activity Evaluation
Source: MDPI journal article supplement (doi:10.3390/scipharm90010002), 2021-12-22
Supplement: s1 [file s1]

## **SUPPLEMENTARY MATERIALS**

**The search for new antibacterial agents among 1,2,3-triazole functionalized Ciprofloxacin and Norfloxacin hybrids: synthesis, docking studies and biological activity evaluation**

**Halyna Hryhoriv<sup>1\*</sup>, Illia Mariutsa<sup>1</sup>, Sergiy M. Kovalenko<sup>2</sup>, Lyudmila Sidorenko<sup>1</sup>, Lina Perekhoda<sup>1</sup>, Nataliia Filimonova<sup>1</sup>, Olga Geyderikh<sup>1</sup>, Victoriya Georgiyants<sup>1</sup>**

<sup>1</sup> National University of Pharmacy, Kharkiv, Ukraine

<sup>2</sup> V. N. Karazin Kharkiv National University, Kharkiv, Ukraine

\* Correspondence: galkagrigoriv@gmail.com

**7-(4-(2-cyanoacetyl)piperazin-1-yl)-1-ethyl-6-fluoro-4-oxo-1,4-dihydroquinoline-3-carboxylic acid**  
**1a**

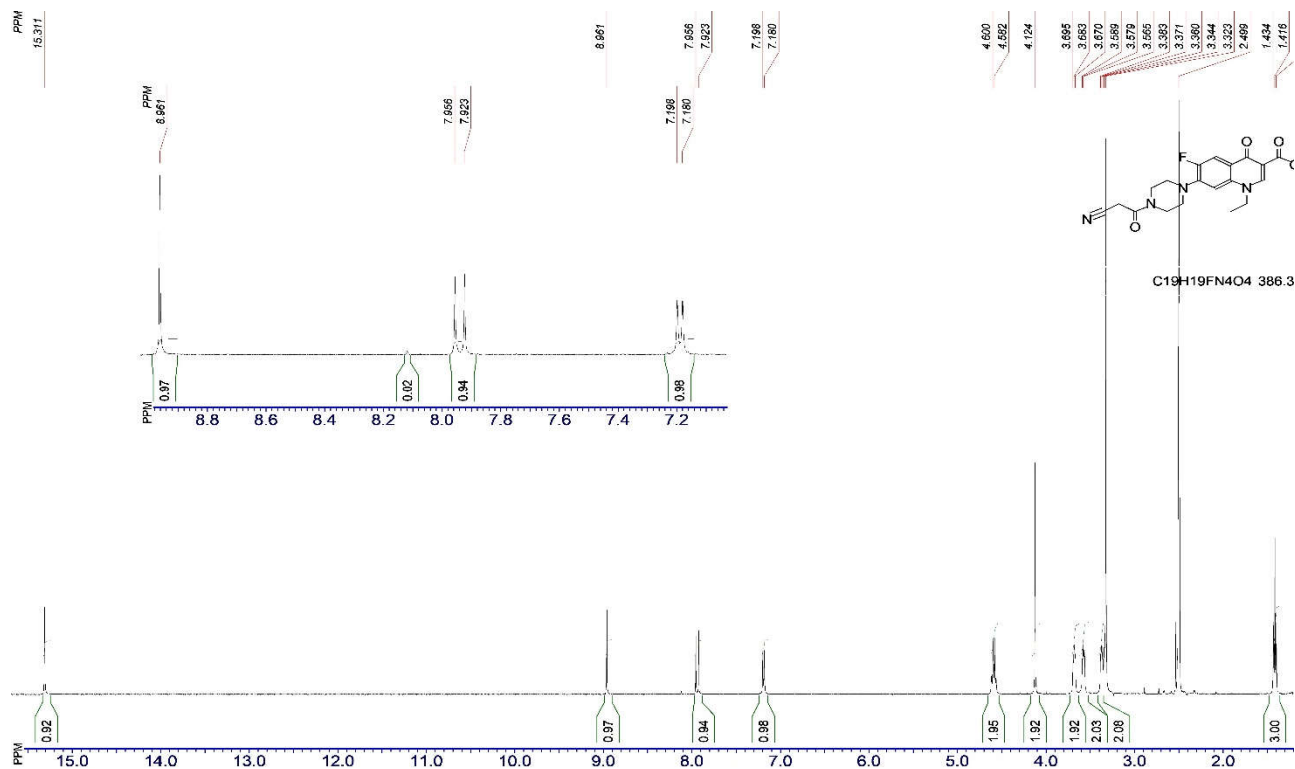

**Figure S1.** <sup>1</sup>H NMR spectrum (400 MHz, DMSO-d<sub>6</sub>) of 7-(4-(2-cyanoacetyl)piperazin-1-yl)-1-ethyl-6-fluoro-4-oxo-1,4-dihydroquinoline-3-carboxylic acid **1a**

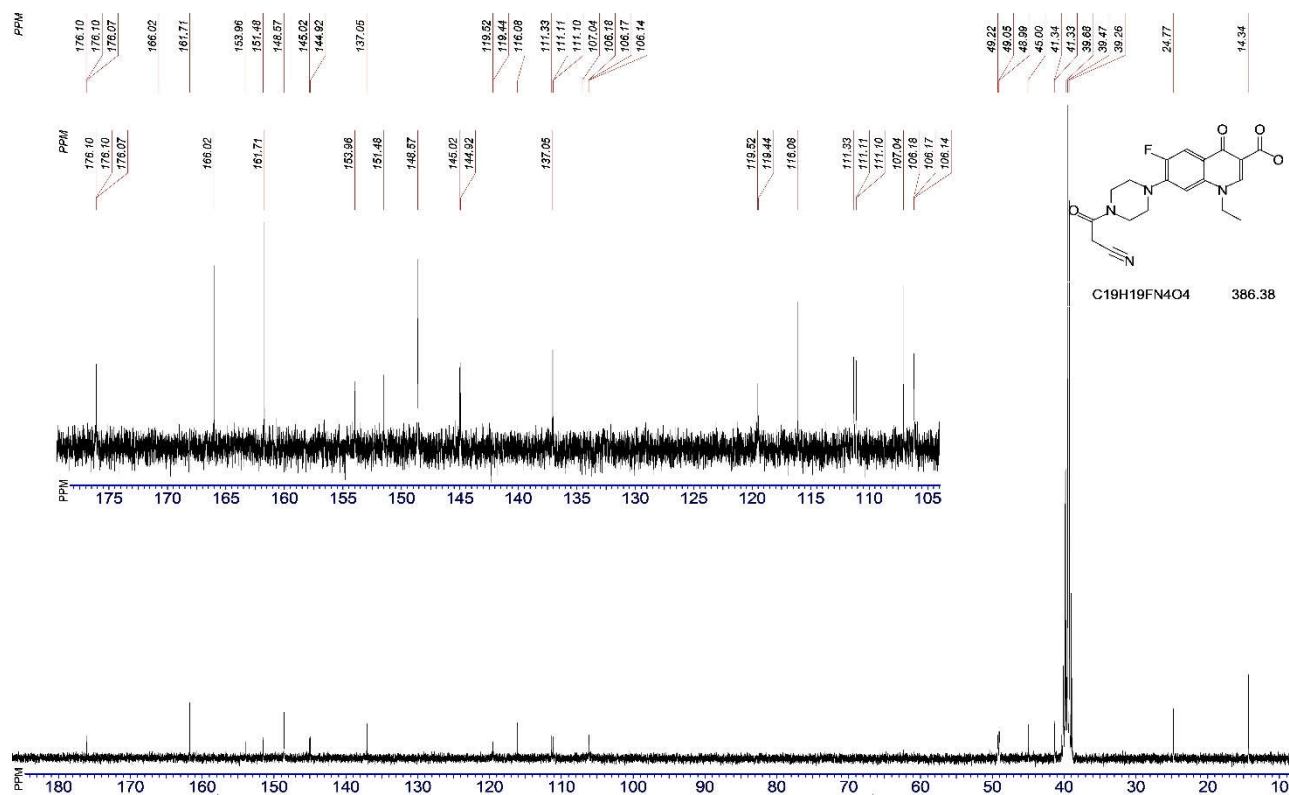

**Figure S2.** <sup>13</sup>C NMR spectrum (100 MHz, DMSO-d<sub>6</sub>) of 7-(4-(2-cyanoacetyl)piperazin-1-yl)-1-ethyl-6-fluoro-4-oxo-1,4-dihydroquinoline-3-carboxylic acid **1a**

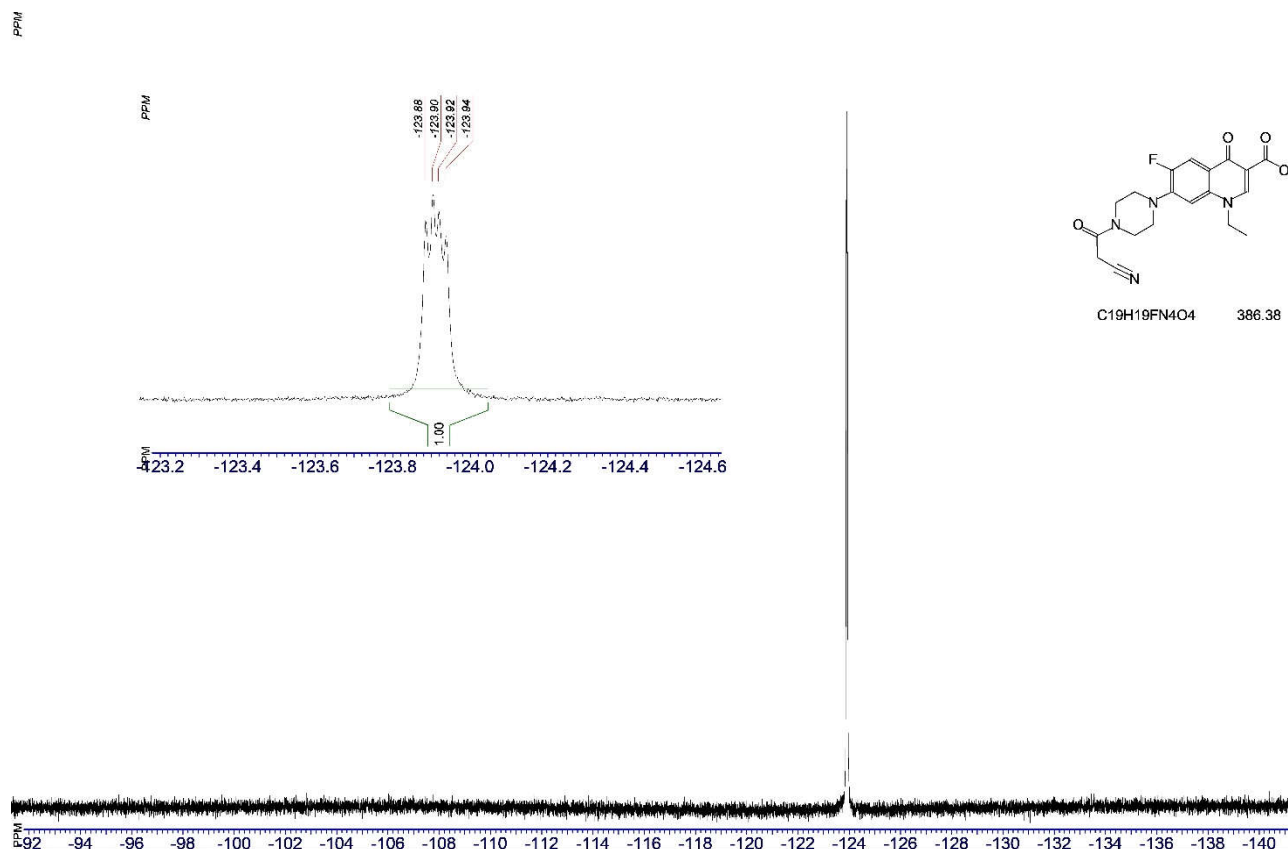

**Figure S3.**  $^{19}\text{F}$  NMR spectrum (376 MHz, DMSO- $d_6$ ) of 7-(4-(2-cyanoacetyl)piperazin-1-yl)-1-ethyl-6-fluoro-4-oxo-1,4-dihydroquinoline-3-carboxylic acid **1a**

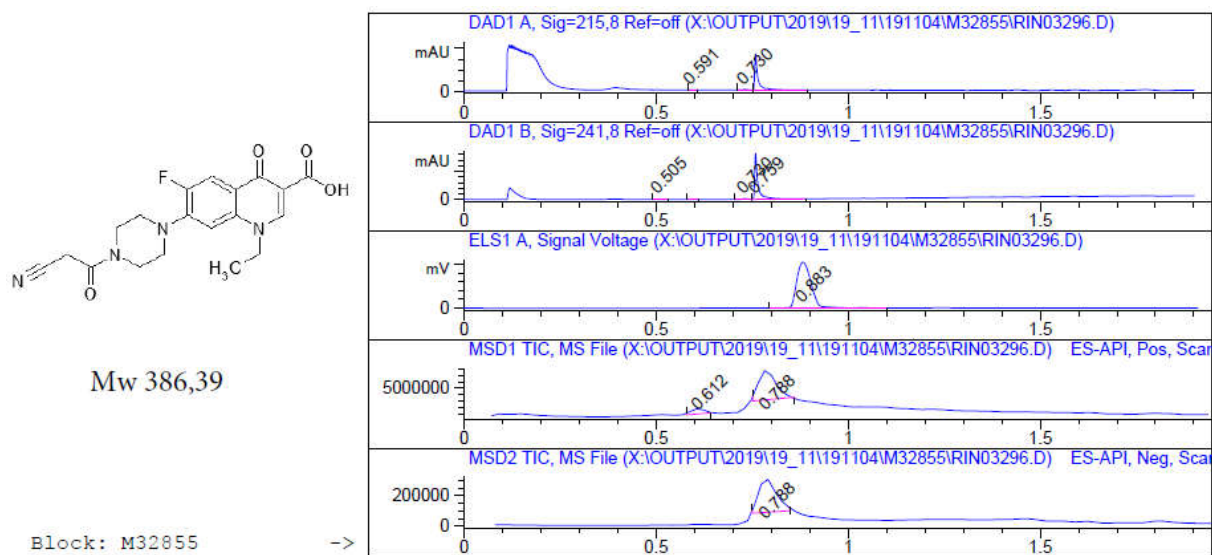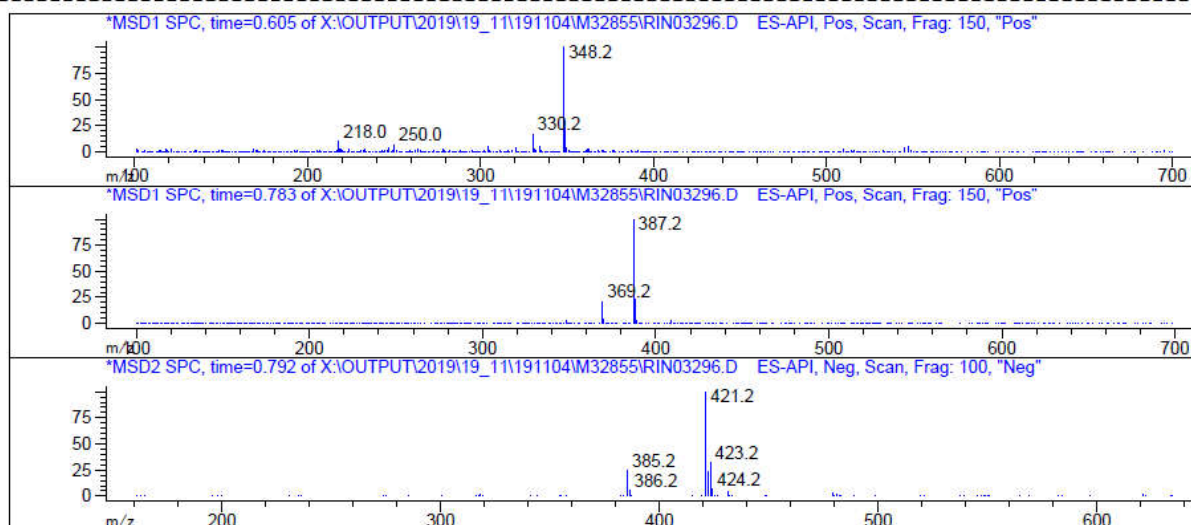

| # | Signal                    | R.Time | Area % |
|---|---------------------------|--------|--------|
| 1 | DAD1 A, Sig=215,8 Ref=off | 0.591  | 1.732  |
| 2 |                           | 0.730  | 2.940  |
| 3 |                           | 0.759  | 95.327 |

  

| # | Signal                    | R.Time | Area % |
|---|---------------------------|--------|--------|
| 1 | DAD1 B, Sig=241,8 Ref=off | 0.505  | 1.502  |
| 2 |                           | 0.591  | 1.070  |
| 3 |                           | 0.730  | 2.284  |
| 4 |                           | 0.759  | 95.143 |

  

| # | Signal                 | R.Time | Area %  |
|---|------------------------|--------|---------|
| 1 | ELS1 A, Signal Voltage | 0.883  | 100.000 |

**Figure S4.** LC/MS data for 7-(4-(2-cyanoacetyl)piperazin-1-yl)-1-ethyl-6-fluoro-4-oxo-1,4-dihydroquinoline-3-carboxylic acid **1a**

| # | Signal            | R.Time | Area % |
|---|-------------------|--------|--------|
| 1 | MSD1 TIC, MS File | 0.612  | 11.830 |
| 2 |                   | 0.788  | 88.170 |

  

| # | Signal            | R.Time | Area %  |
|---|-------------------|--------|---------|
| 1 | MSD2 TIC, MS File | 0.788  | 100.000 |

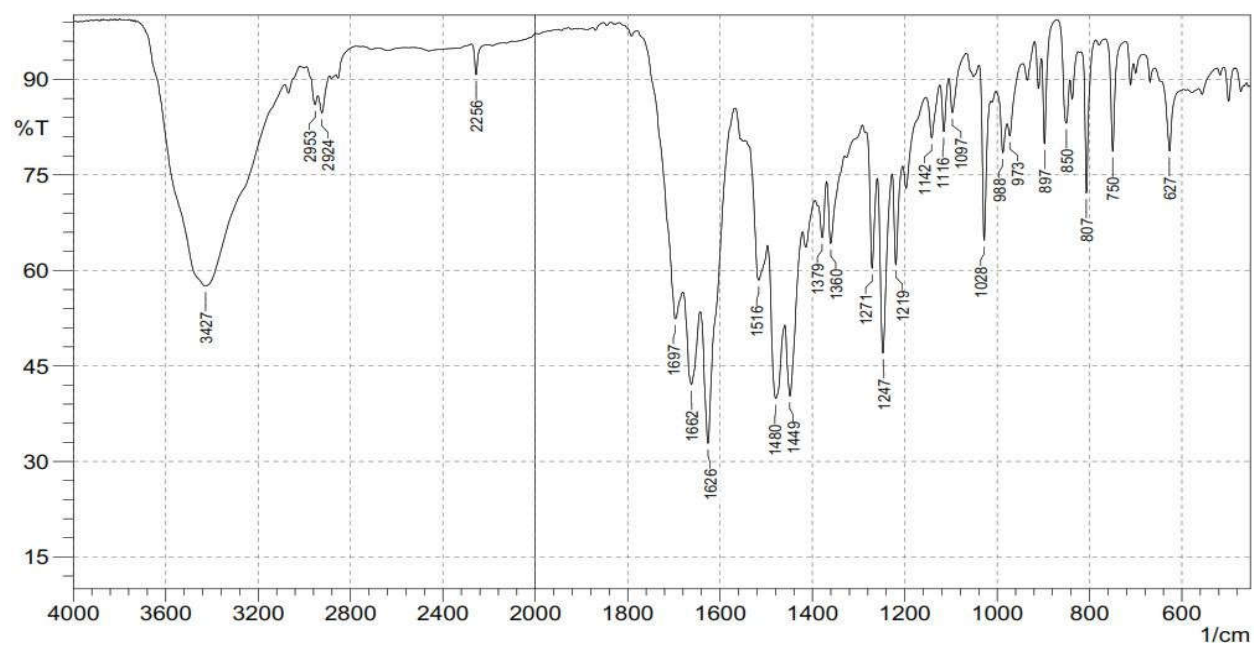

**Figure S5.** IR spectrum of 7-(4-(2-cyanoacetyl)piperazin-1-yl)-1-ethyl-6-fluoro-4-oxo-1,4-dihydroquinoline-3-carboxylic acid **1a**

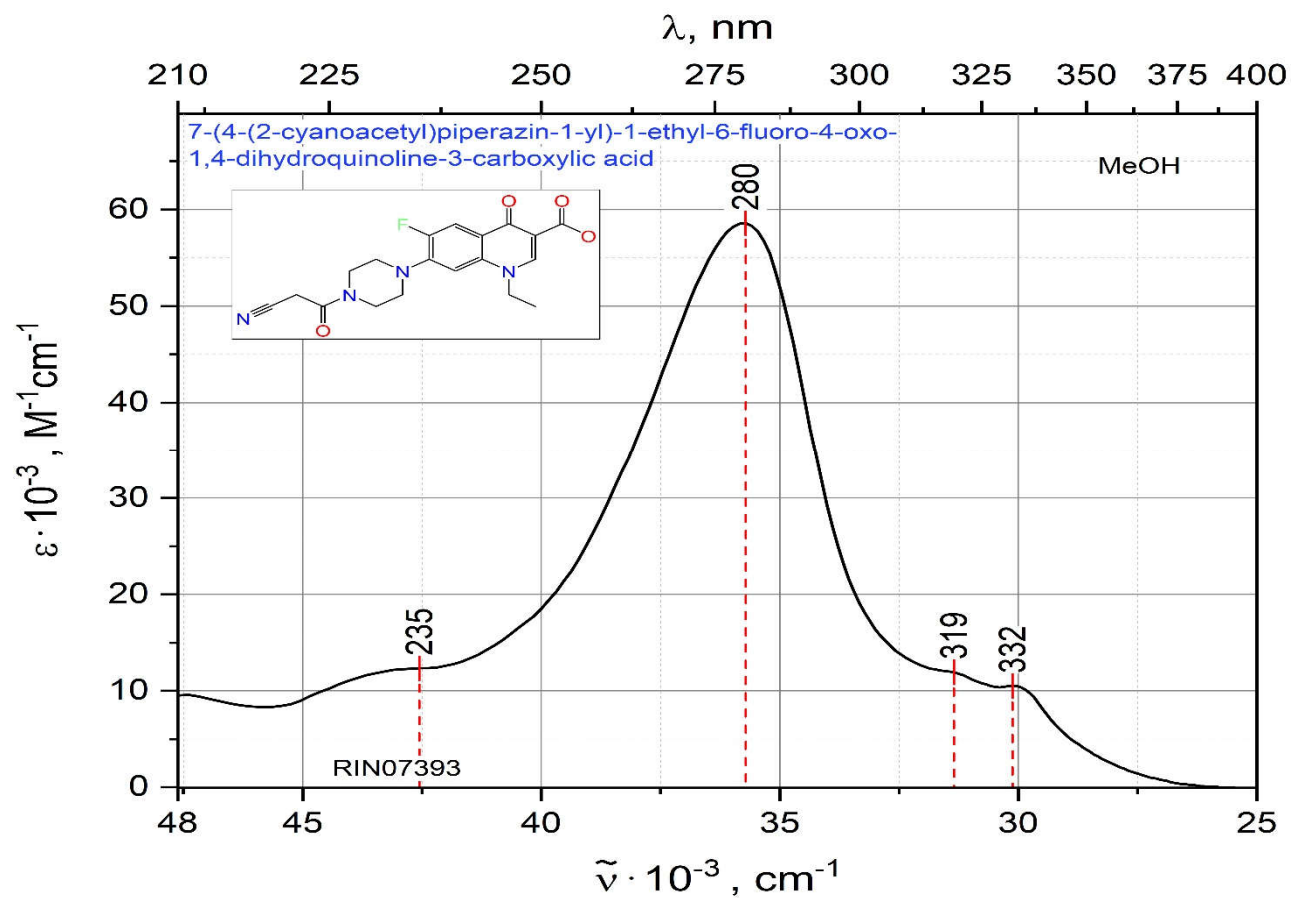

**Figure S6.** UV/Vis spectrum of 7-(4-(2-cyanoacetyl)piperazin-1-yl)-1-ethyl-6-fluoro-4-oxo-1,4-dihydroquinoline-3-carboxylic acid **1a**

**7-(4-(2-cyanoacetyl)piperazin-1-yl)-1-cyclopropyl-6-fluoro-4-oxo-1,4-dihydroquinoline-3-carboxylic acid 2a**

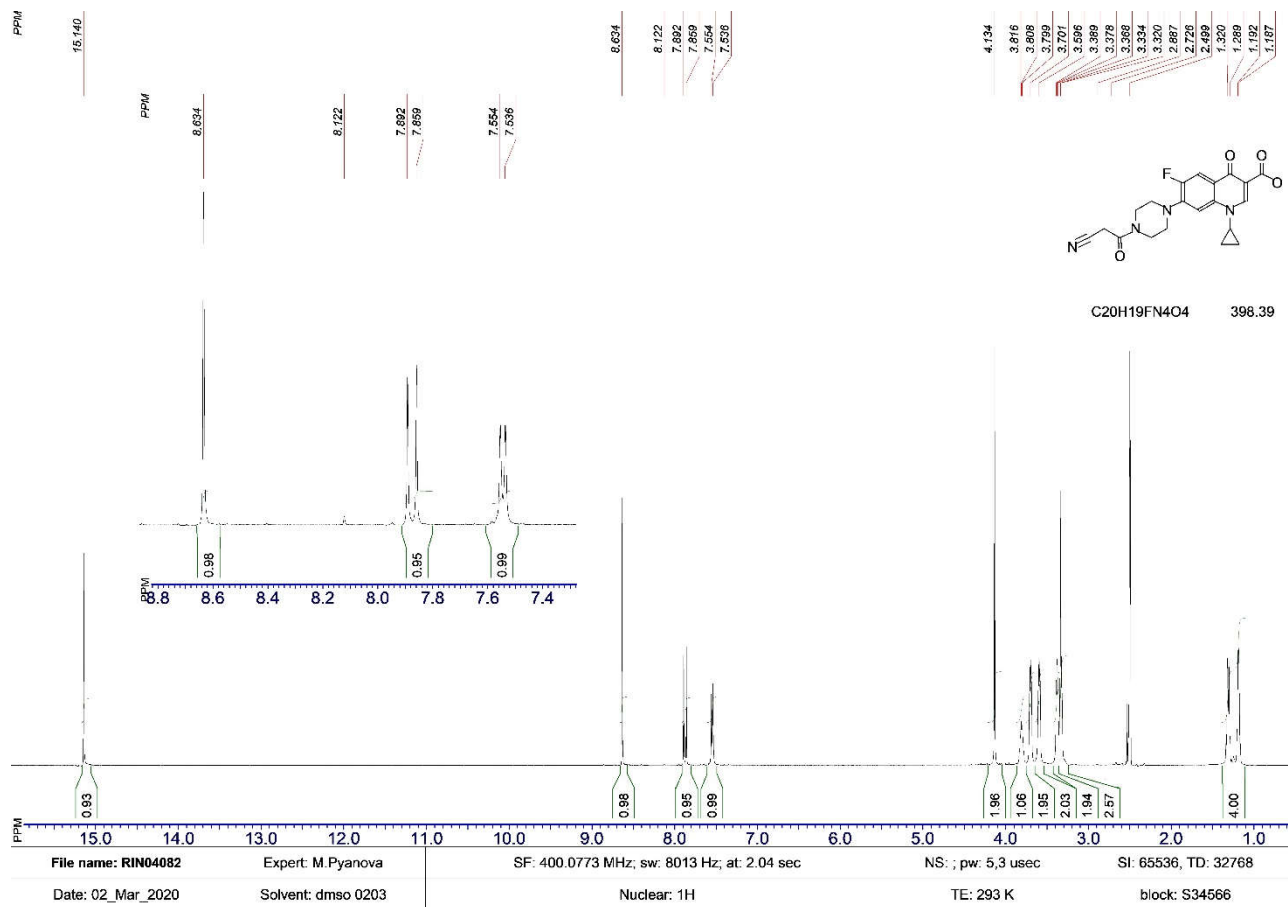

**Figure S7.** <sup>1</sup>H NMR spectrum (400 MHz, DMSO-d<sub>6</sub>) of 7-(4-(2-cyanoacetyl)piperazin-1-yl)-1-cyclopropyl-6-fluoro-4-oxo-1,4-dihydroquinoline-3-carboxylic acid **2a**



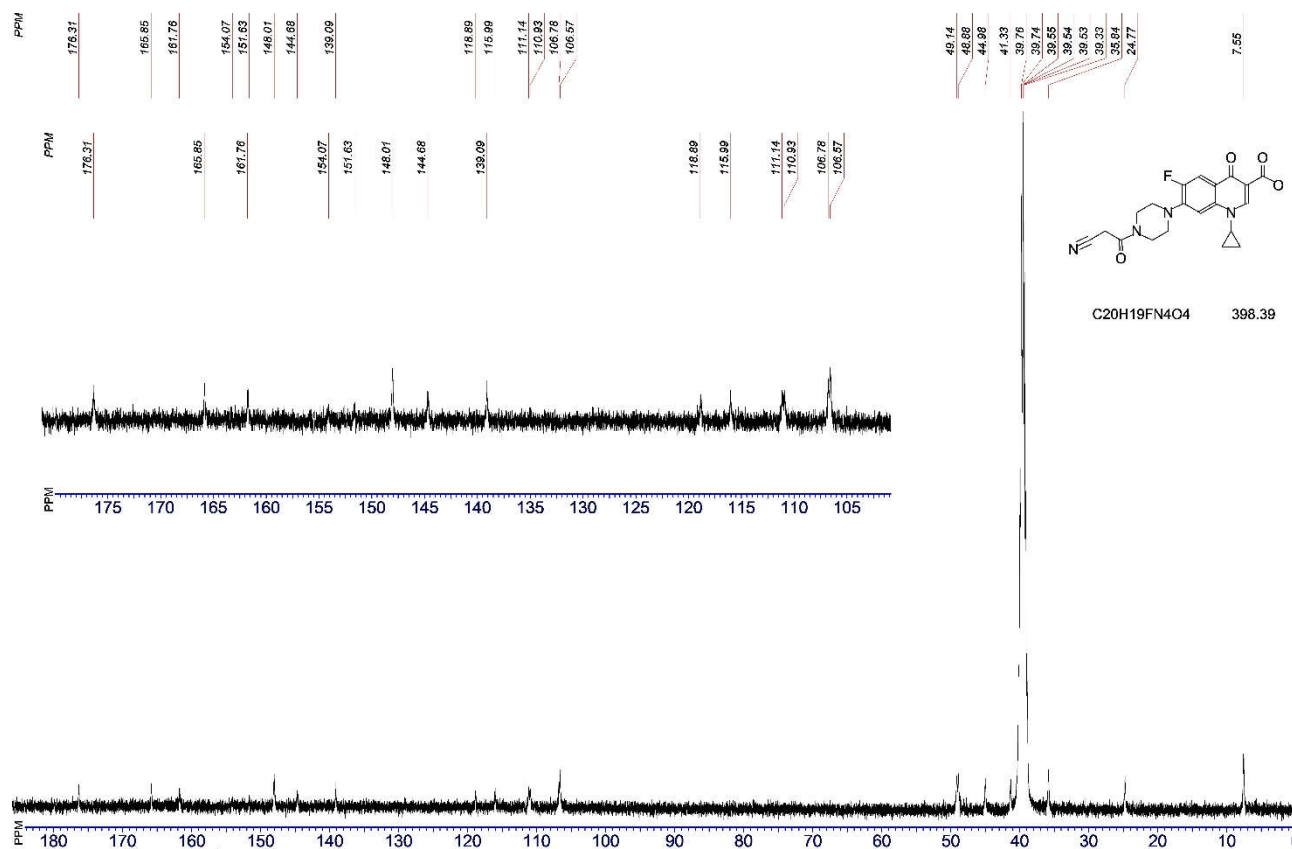

**Figure S8.** <sup>13</sup>C NMR spectrum (100 MHz, DMSO-d<sub>6</sub>) of 7-(4-(2-cyanoacetyl)piperazin-1-yl)-1-cyclopropyl-6-fluoro-4-oxo-1,4-dihydroquinoline-3-carboxylic acid **2a**

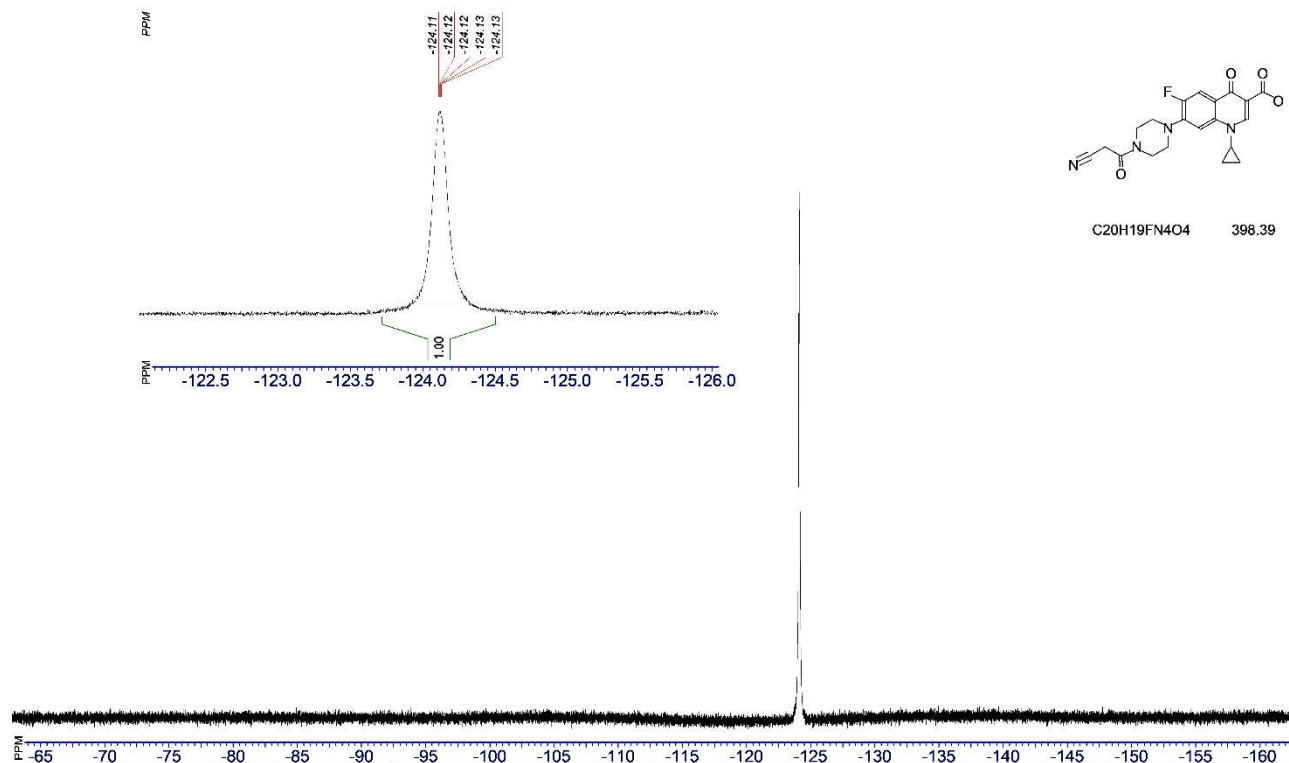

**Figure S9.**  $^{19}\text{F}$  NMR spectrum (376 MHz, DMSO- $d_6$ ) of 7-(4-(2-cyanoacetyl)piperazin-1-yl)-1-cyclopropyl-6-fluoro-4-oxo-1,4-dihydroquinoline-3-carboxylic acid **2a**

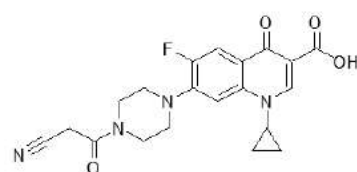

Mw 398,40

Block: M34166

->

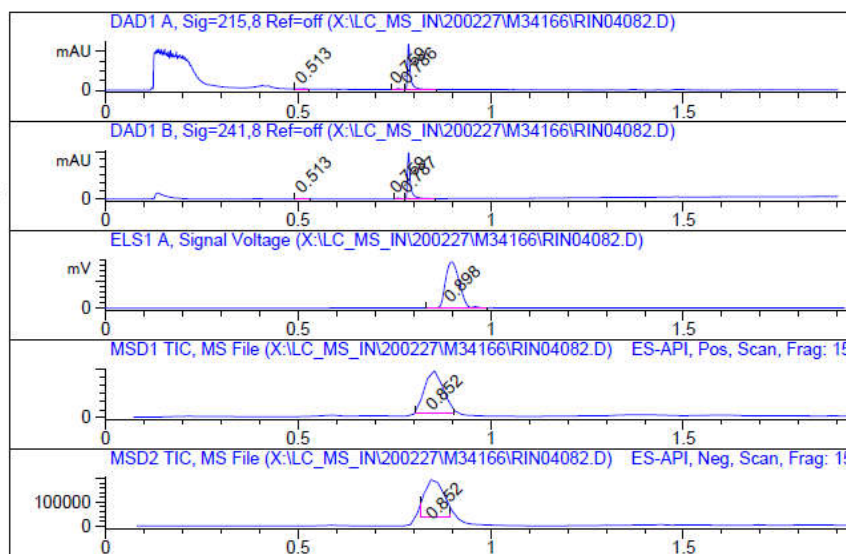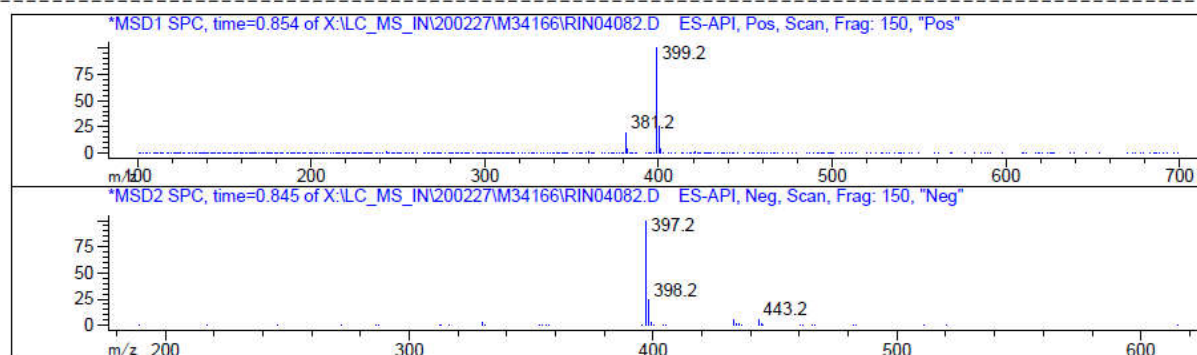

| # | Signal                    | R.Time | Area % |
|---|---------------------------|--------|--------|
| 1 | DAD1 A, Sig=215,8 Ref=off | 0.513  | 3.223  |
| 2 |                           | 0.759  | 2.561  |
| 3 |                           | 0.786  | 94.216 |

  

| # | Signal                    | R.Time | Area % |
|---|---------------------------|--------|--------|
| 1 | DAD1 B, Sig=241,8 Ref=off | 0.513  | 4.380  |
| 2 |                           | 0.759  | 2.150  |
| 3 |                           | 0.787  | 93.470 |

  

| # | Signal                 | R.Time | Area %  |
|---|------------------------|--------|---------|
| 1 | ELS1 A, Signal Voltage | 0.898  | 100.000 |

  

| # | Signal            | R.Time | Area %  |
|---|-------------------|--------|---------|
| 1 | MSD1 TIC, MS File | 0.852  | 100.000 |

**Figure S10.** LC/MS data for 7-(4-(2-cyanoacetyl)piperazin-1-yl)-1-cyclopropyl-6-fluoro-4-oxo-1,4-dihydroquinoline-3-carboxylic acid **2a**

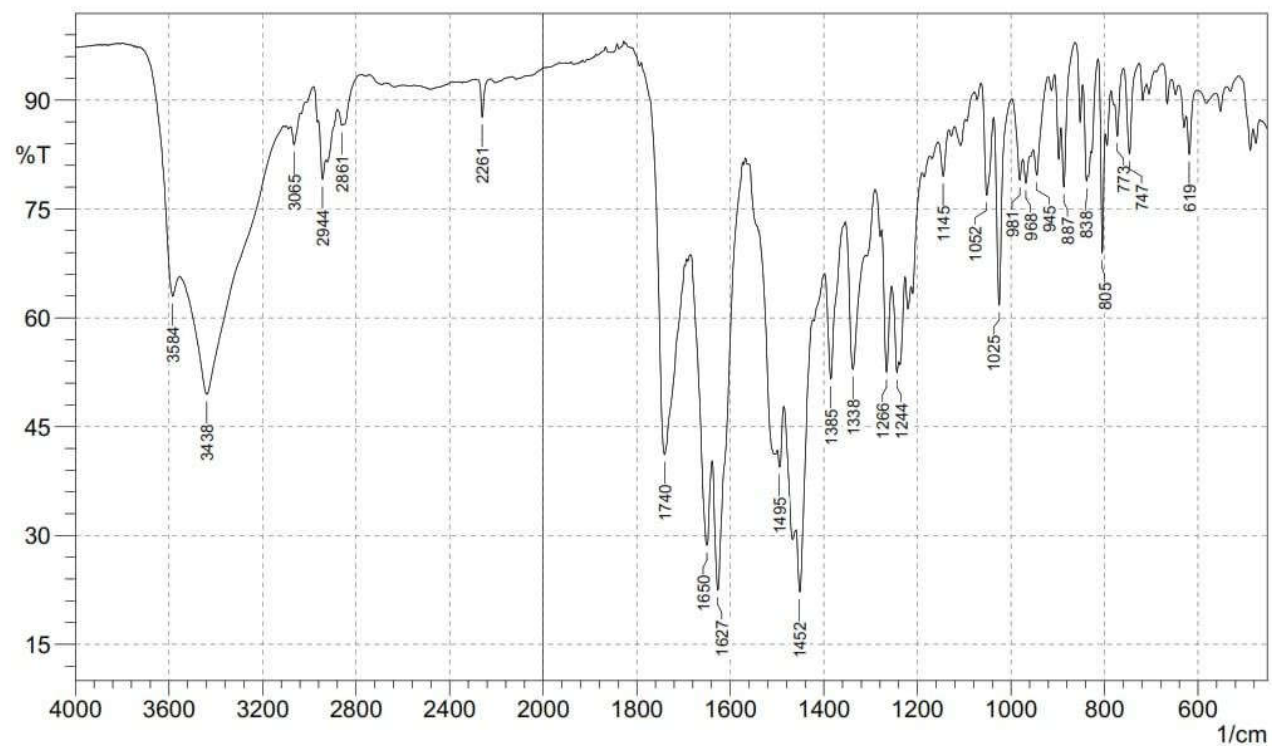

**Figure S11.** IR spectrum of 7-(4-(2-cyanoacetyl)piperazin-1-yl)-1-cyclopropyl-6-fluoro-4-oxo-1,4-dihydroquinoline-3-carboxylic acid **2a**

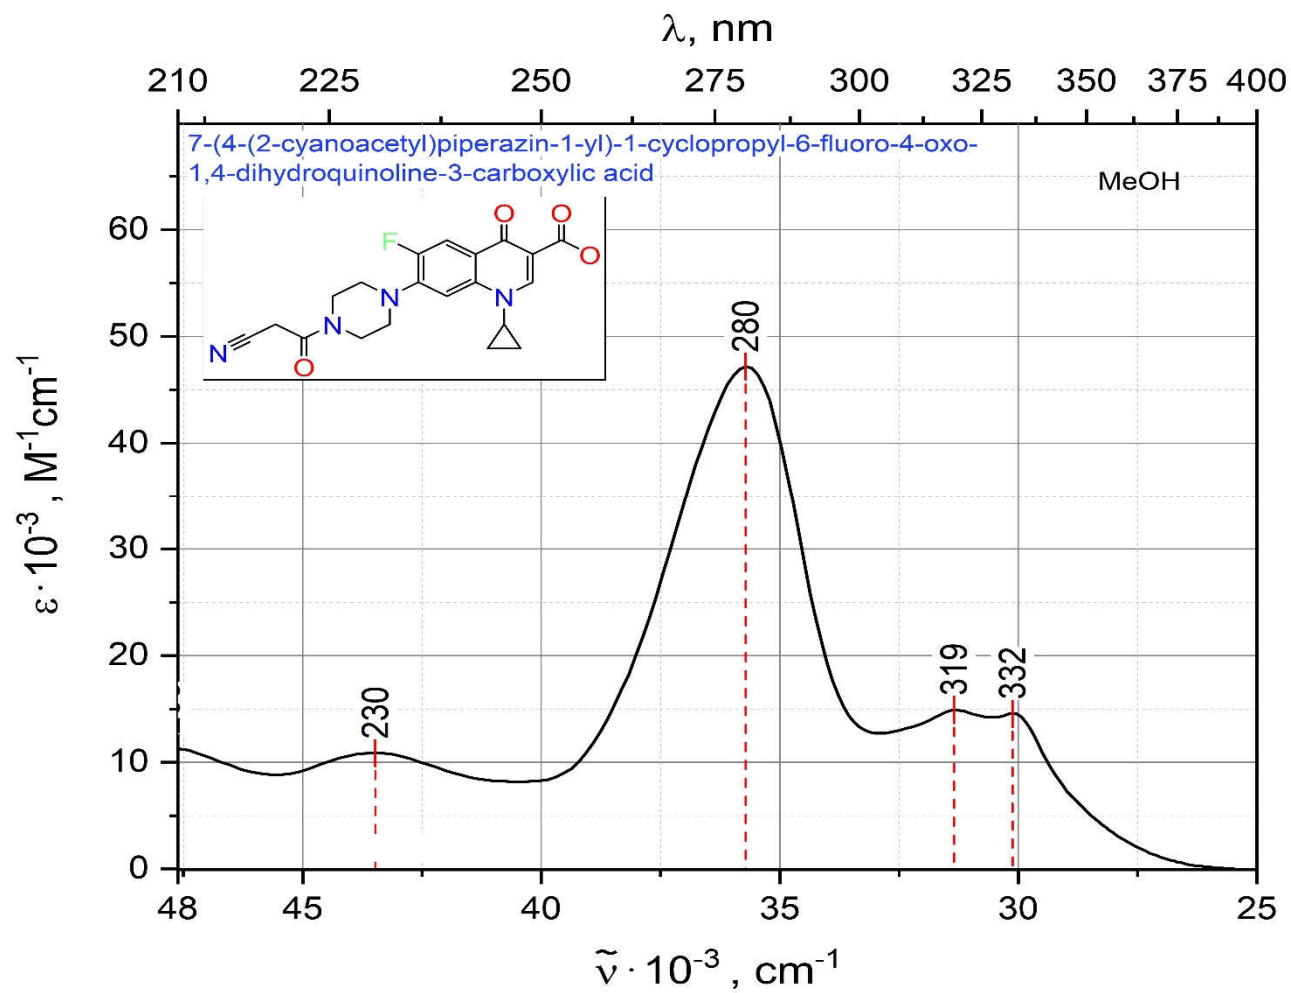

**Figure S12.** UV/Vis spectrum of 7-(4-(2-cyanoacetyl)piperazin-1-yl)-1-cyclopropyl-6-fluoro-4-oxo-1,4-dihydroquinoline-3-carboxylic acid **2a**

**7-(4-(5-amino-1-(p-tolyl)-1H-1,2,3-triazole-4-carbonyl)piperazin-1-yl)-1-ethyl-6-fluoro-4-oxo-1,4-dihydroquinoline-3-carboxylic acid **1b****

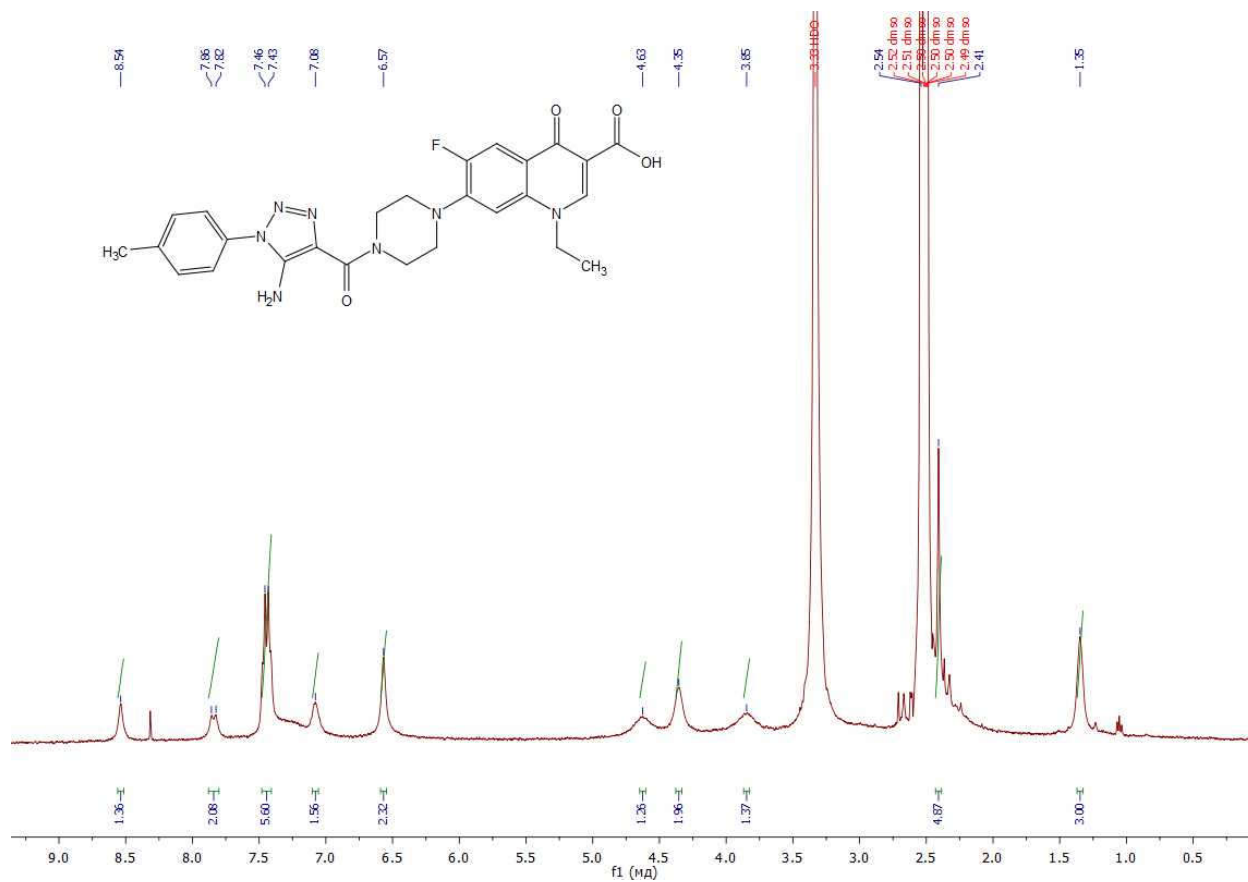

**Figure S13.** <sup>1</sup>H NMR spectrum (400 MHz, DMSO-d<sub>6</sub>) of 7-(4-(5-amino-1-(p-tolyl)-1H-1,2,3-triazole-4-carbonyl)piperazin-1-yl)-1-ethyl-6-fluoro-4-oxo-1,4-dihydroquinoline-3-carboxylic acid **1b**

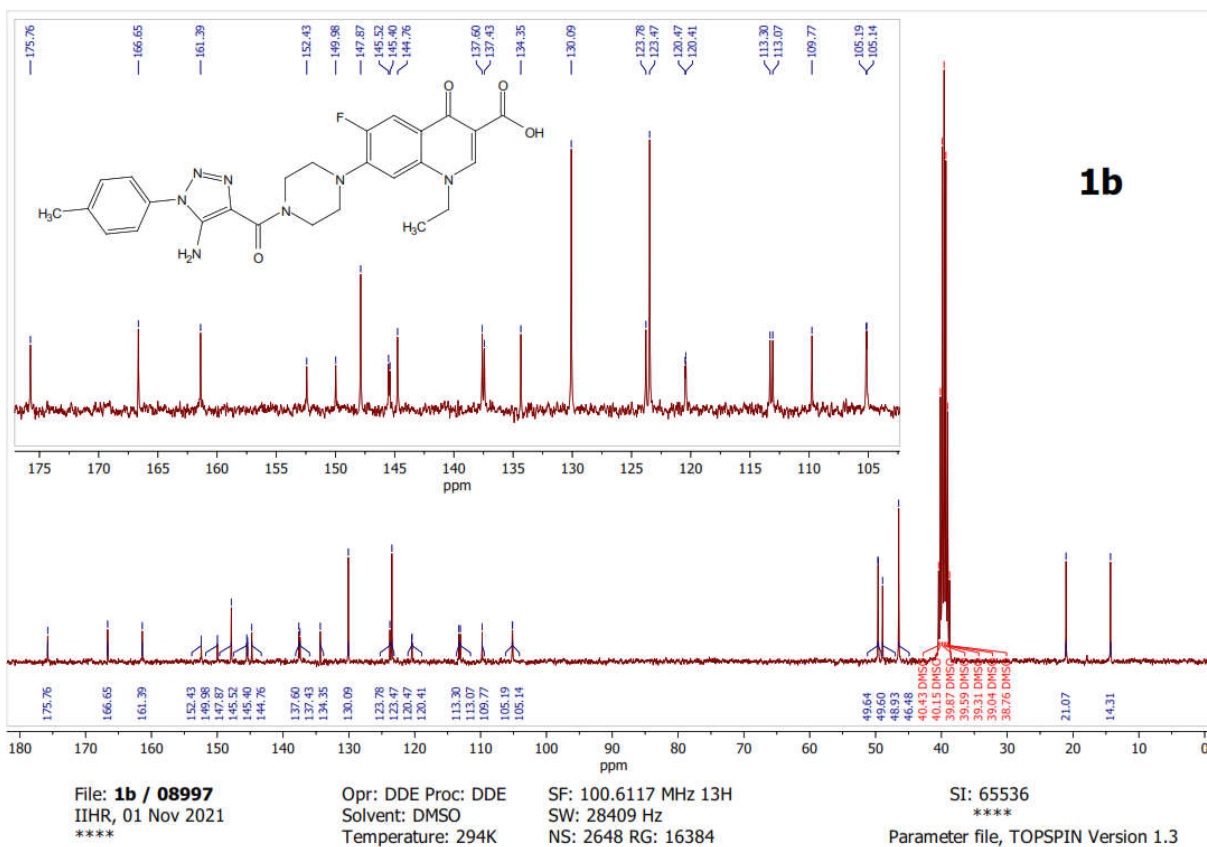

**Figure S14.**  $^{13}\text{C}$  NMR spectrum (100 MHz, DMSO- $d_6$ ) of 7-(4-(5-amino-1-(p-tolyl)-1H-1,2,3-triazole-4-carbonyl)piperazin-1-yl)-1-ethyl-6-fluoro-4-oxo-1,4-dihydroquinoline-3-carboxylic acid **1b**

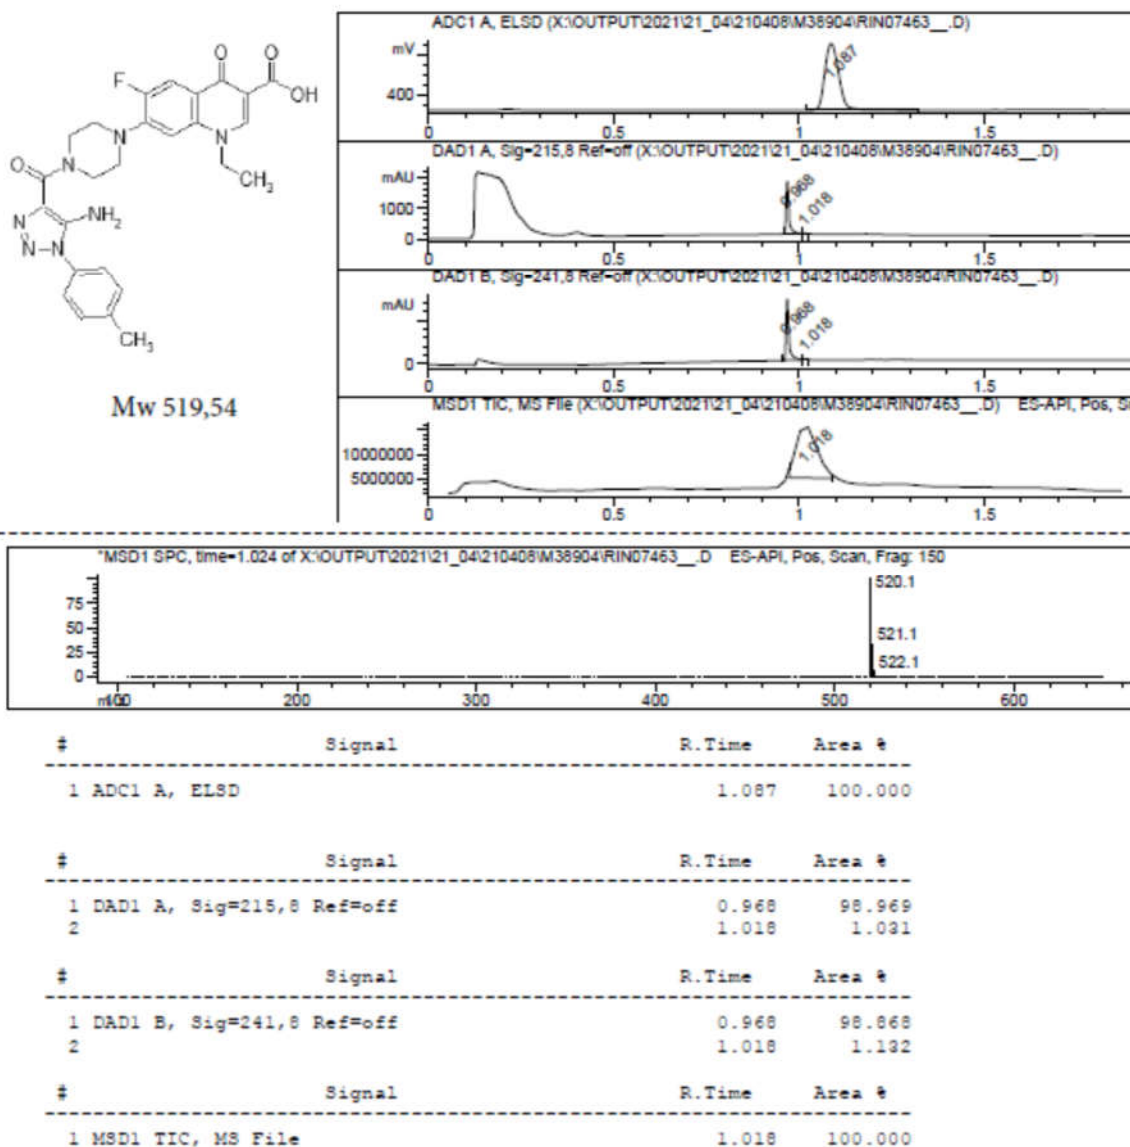

**Figure S15.** LC/MS data for 7-(4-(5-amino-1-(p-tolyl)-1H-1,2,3-triazole-4-carbonyl)piperazin-1-yl)-1-ethyl-6-fluoro-4-oxo-1,4-dihydroquinoline-3-carboxylic acid **1b**



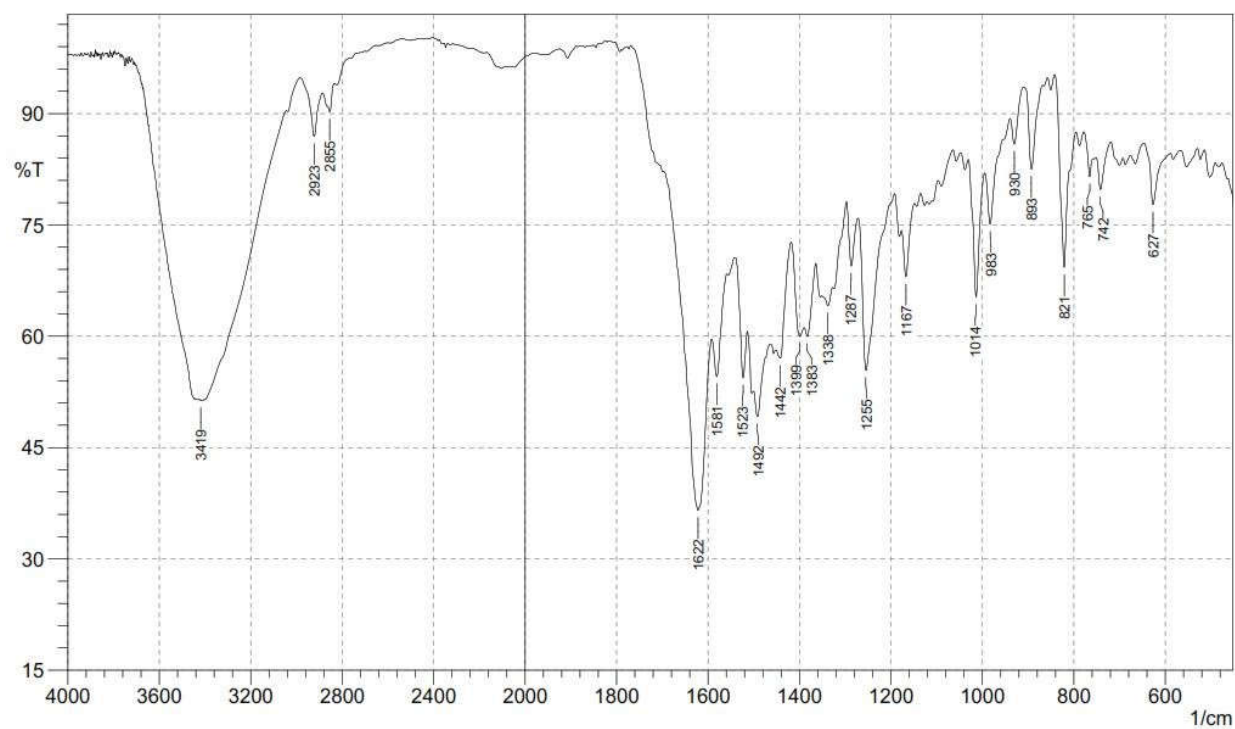

**Figure S16.** IR spectrum of 7-(4-(5-amino-1-(p-tolyl)-1H-1,2,3-triazole-4-carbonyl)piperazin-1-yl)-1-ethyl-6-fluoro-4-oxo-1,4-dihydroquinoline-3-carboxylic acid **1b**.

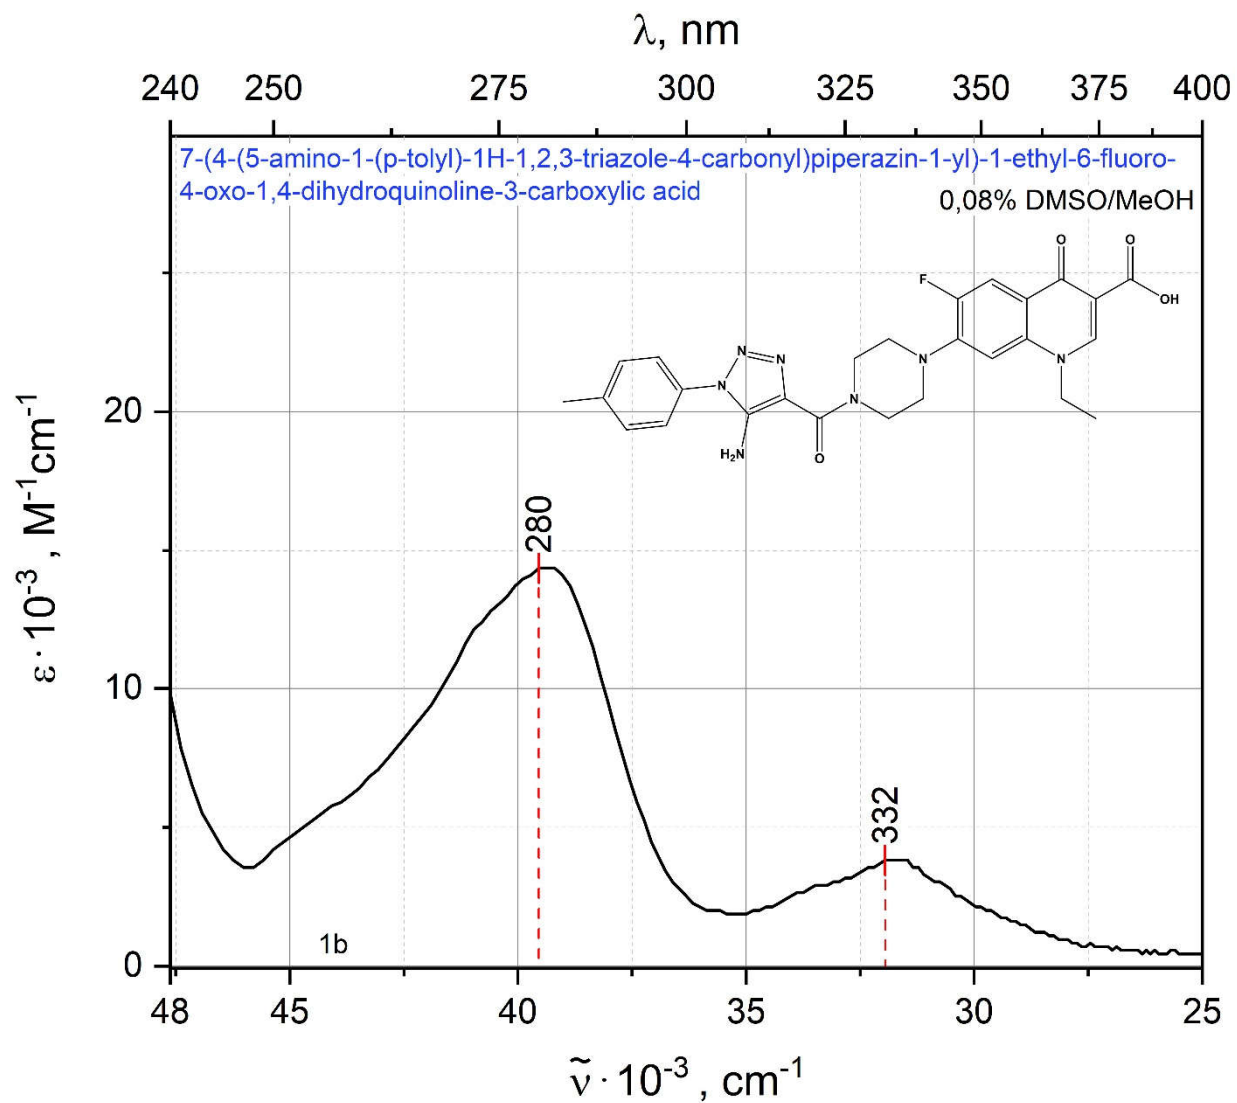

**Figure S17.** UV/Vis spectrum of 7-(4-(5-amino-1-(p-tolyl)-1H-1,2,3-triazole-4-carbonyl)piperazin-1-yl)-1-ethyl-6-fluoro-4-oxo-1,4-dihydroquinoline-3-carboxylic acid **1b** (0.08%DMSO/MeOH)

**7-(4-(5-amino-1-(4-bromophenyl)-1H-1,2,3-triazole-4-carbonyl)piperazin-1-yl)-1-ethyl-6-fluoro-4-oxo-1,4-dihydroquinoline-3-carboxylic acid **1c****

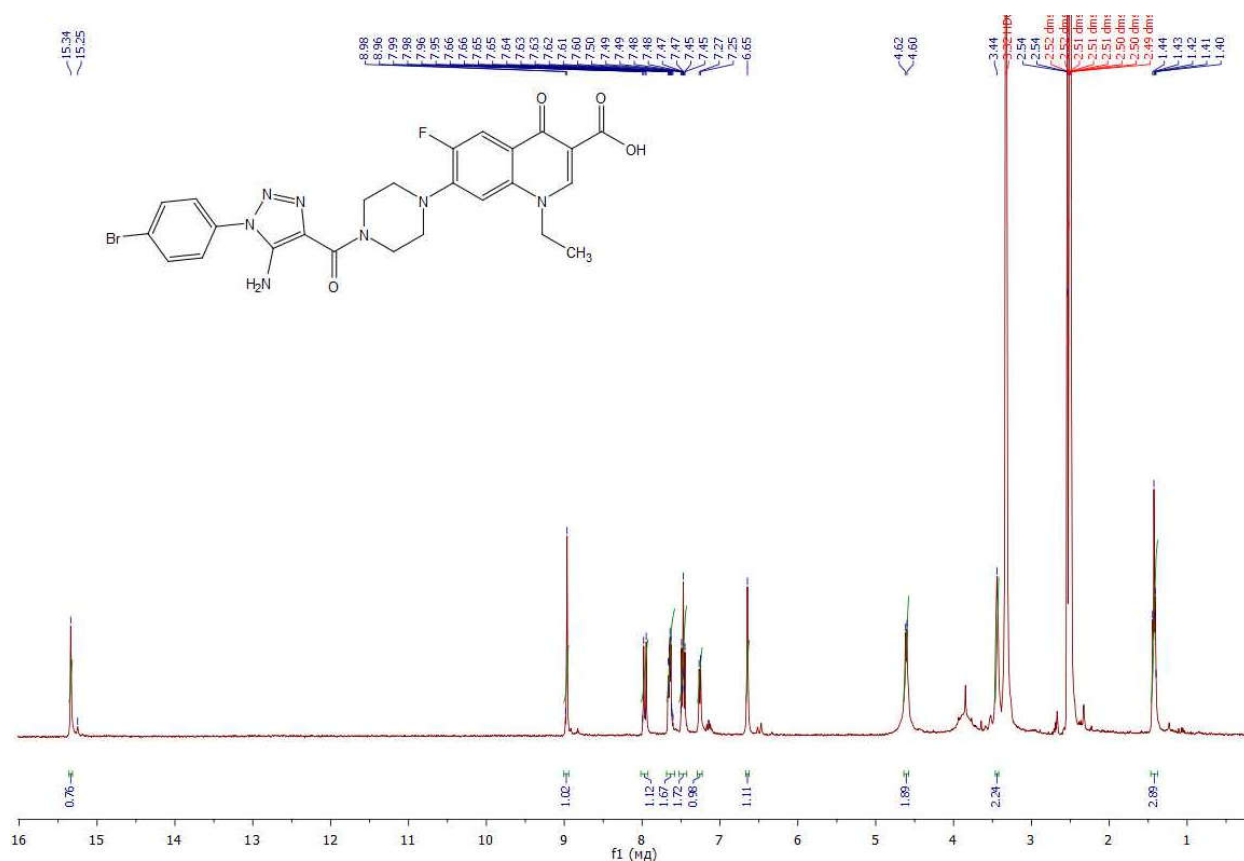

**Figure S18.** <sup>1</sup>H NMR spectrum (400 MHz, DMSO-d<sub>6</sub>) of 7-(4-(5-amino-1-(4-bromophenyl)-1H-1,2,3-triazole-4-carbonyl)piperazin-1-yl)-1-ethyl-6-fluoro-4-oxo-1,4-dihydroquinoline-3-carboxylic acid **1c**

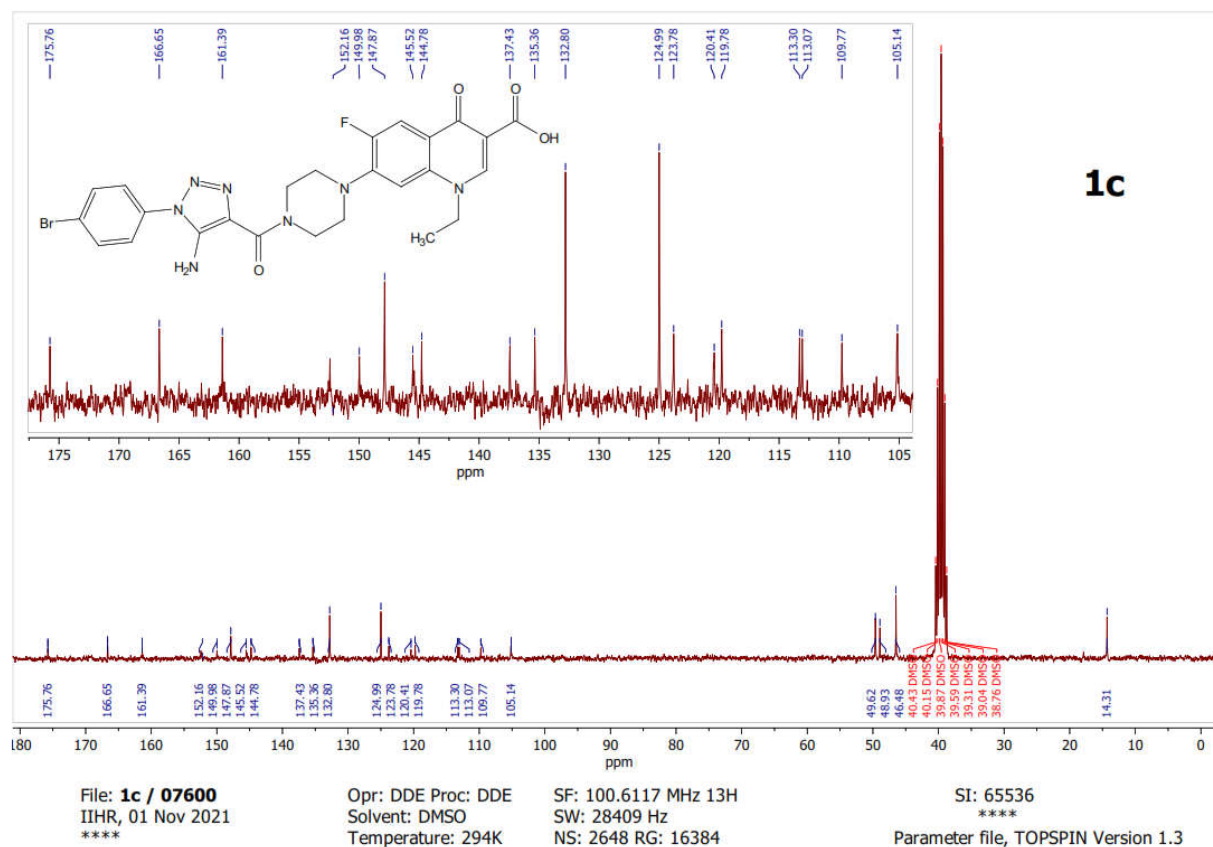

**Figure S19.**  $^{13}\text{C}$  NMR spectrum (100 MHz, DMSO- $d_6$ ) of 7-(4-(5-amino-1-(4-bromophenyl)-1H-1,2,3-triazole-4-carbonyl)piperazin-1-yl)-1-ethyl-6-fluoro-4-oxo-1,4-dihydroquinoline-3-carboxylic acid **1c**

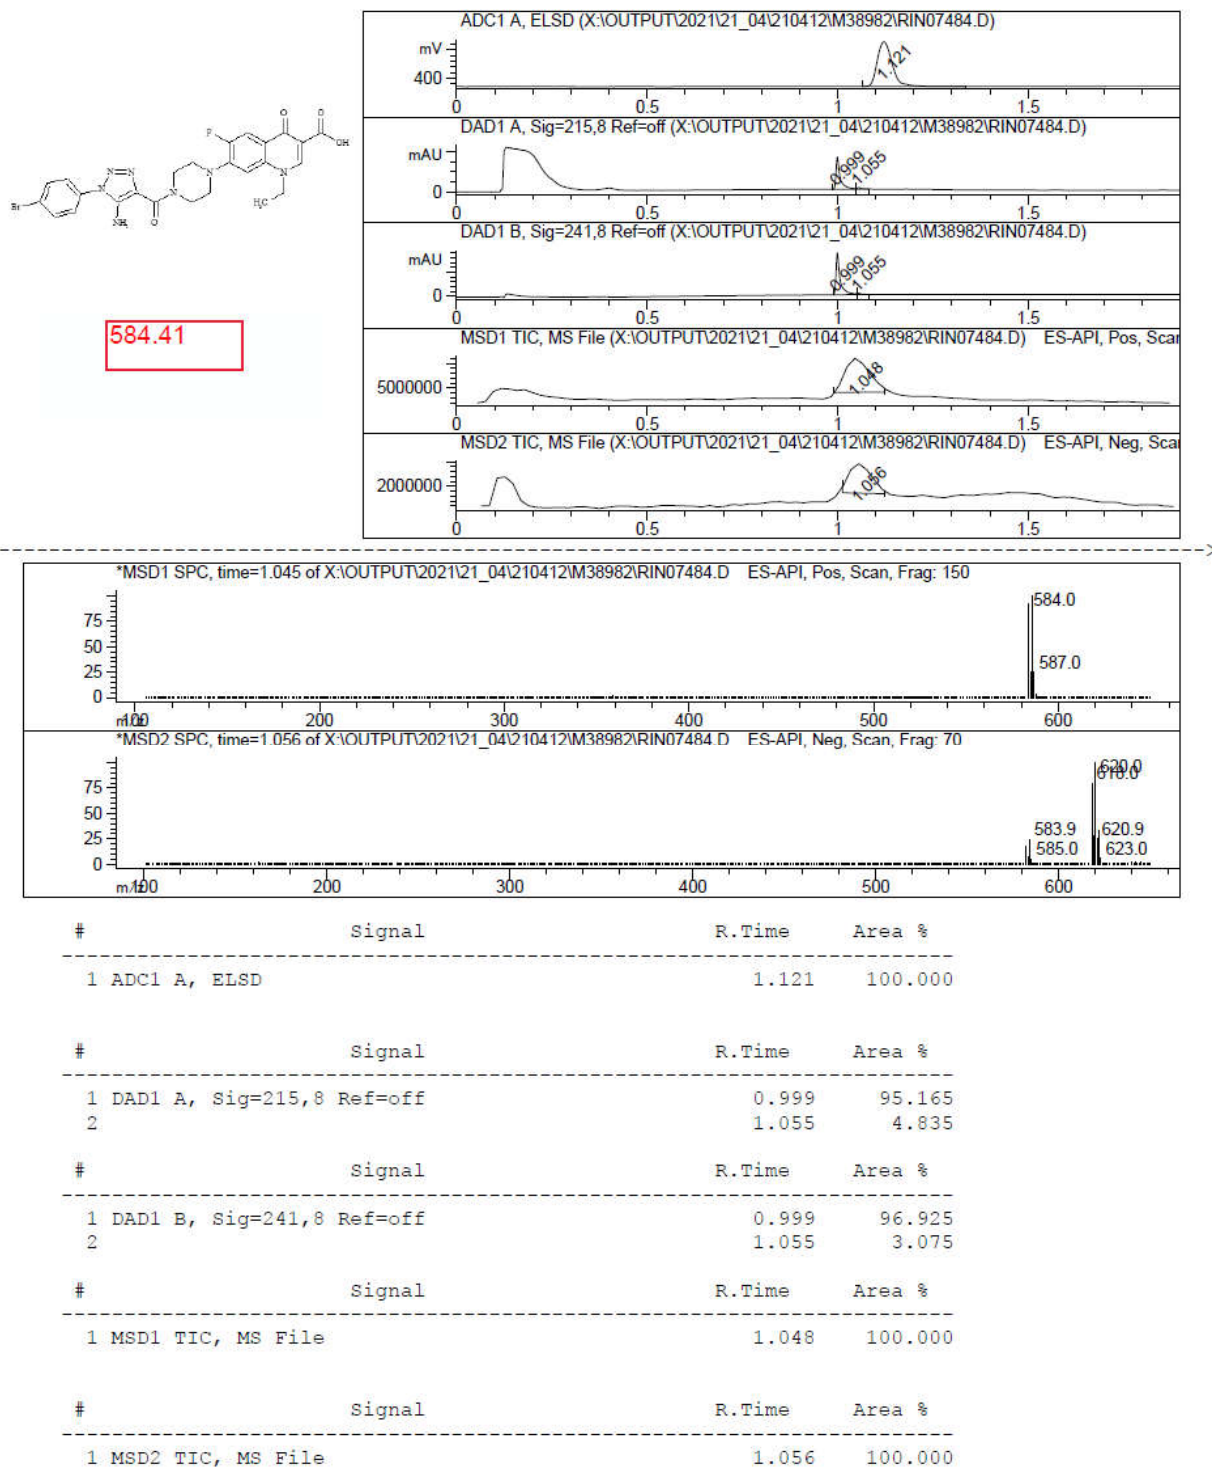

**Figure S20.** LC/MS data for 7-(4-(5-amino-1-(4-bromophenyl)-1H-1,2,3-triazole-4-carbonyl)piperazin-1-yl)-1-ethyl-6-fluoro-4-oxo-1,4-dihydroquinoline-3-carboxylic acid **1c**

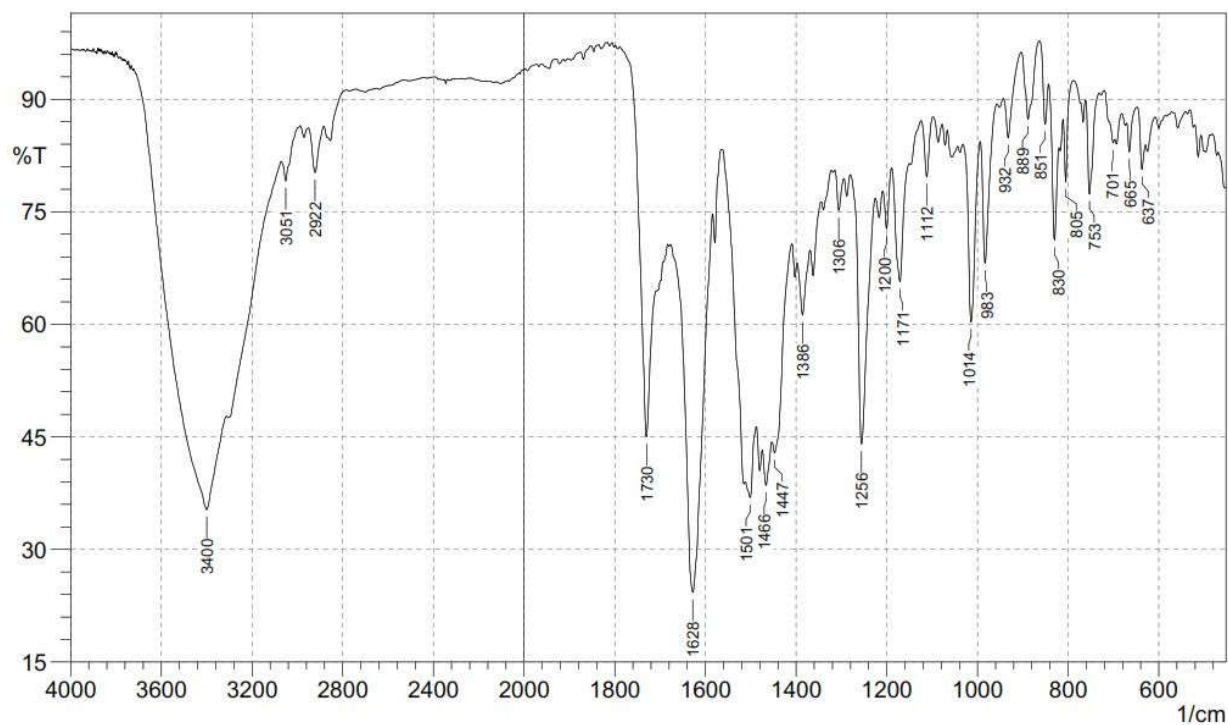

**Figure S21.** IR spectrum of 7-(4-(5-amino-1-(4-bromophenyl)-1H-1,2,3-triazole-4-carbonyl)piperazin-1-yl)-1-ethyl-6-fluoro-4-oxo-1,4-dihydroquinoline-3-carboxylic acid **1c**

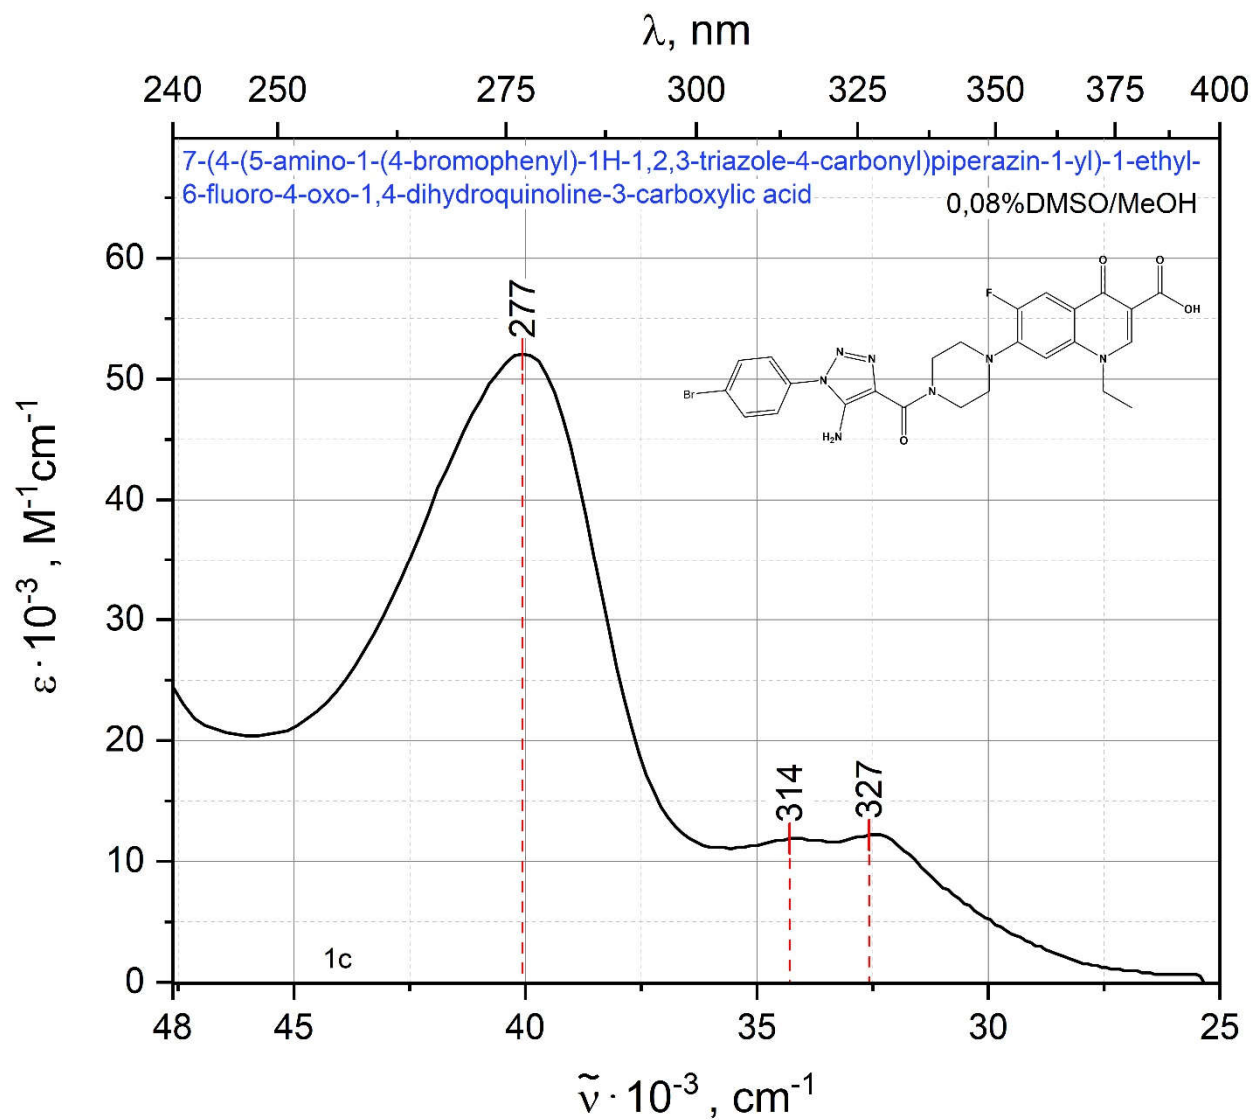

**Figure S22.** UV/Vis spectrum of 7-(4-(5-amino-1-(4-bromophenyl)-1H-1,2,3-triazole-4-carbonyl)piperazin-1-yl)-1-ethyl-6-fluoro-4-oxo-1,4-dihydroquinoline-3-carboxylic acid **1c** (0.08%DMSO/MeOH)

**7-(4-(5-amino-1-phenyl-1H-1,2,3-triazole-4-carbonyl)piperazin-1-yl)-1-cyclopropyl-6-fluoro-4-oxo-1,4-dihydroquinoline-3-carboxylic acid **2d****

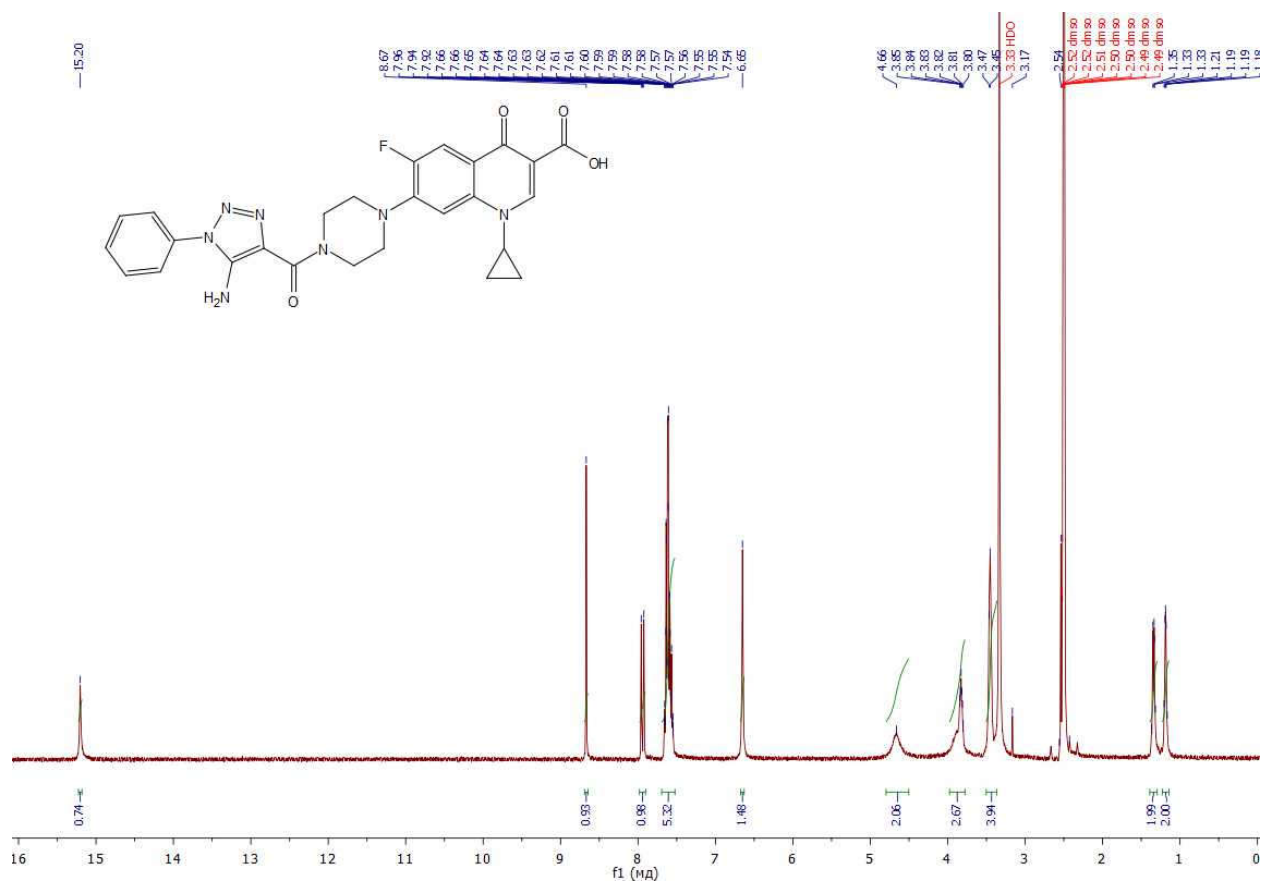

**Figure S23.** <sup>1</sup>H NMR spectrum (400 MHz, DMSO-d<sub>6</sub>) of 7-(4-(5-amino-1-phenyl-1H-1,2,3-triazole-4-carbonyl)piperazin-1-yl)-1-cyclopropyl-6-fluoro-4-oxo-1,4-dihydroquinoline-3-carboxylic acid **2d**



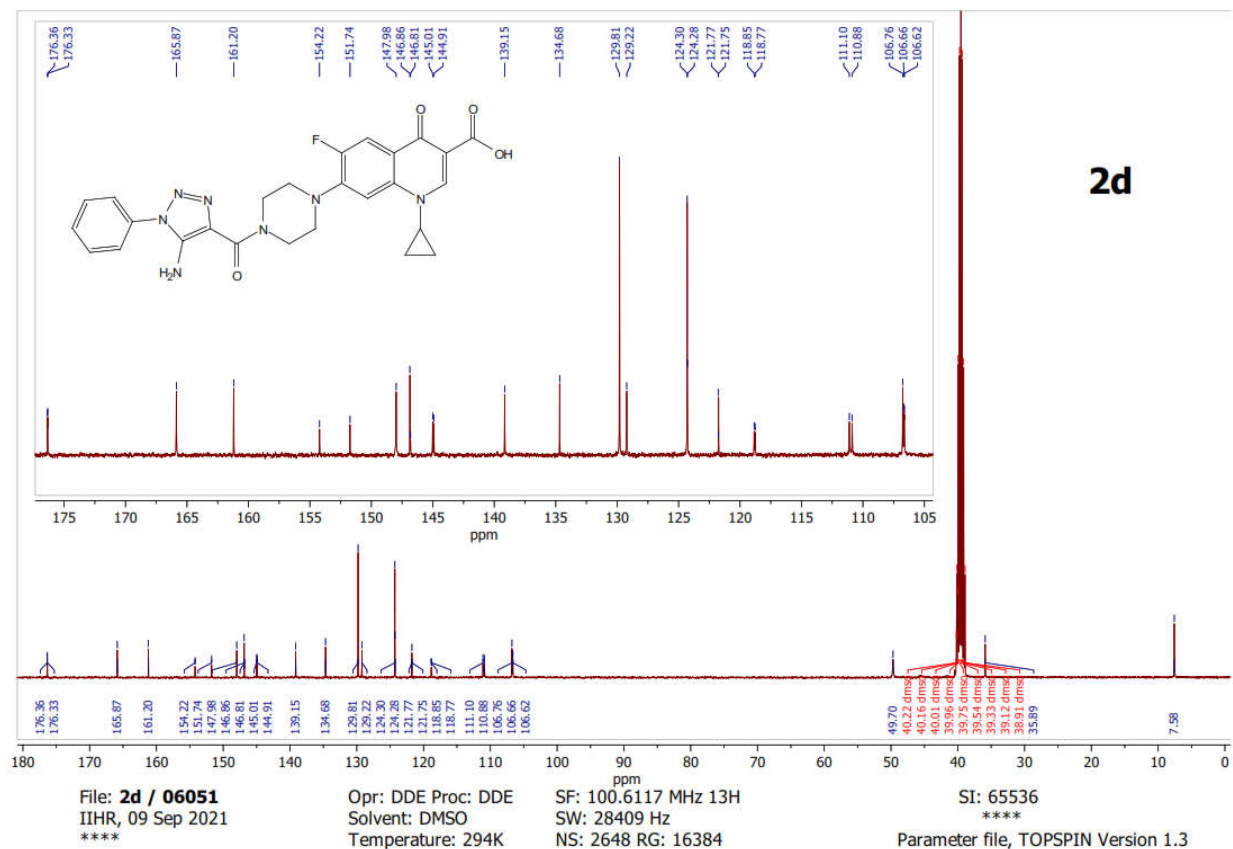

**Figure S24.** <sup>13</sup>C NMR spectrum (100 MHz, DMSO-d<sub>6</sub>) of 7-(4-(5-amino-1-phenyl-1H-1,2,3-triazole-4-carbonyl)piperazin-1-yl)-1-cyclopropyl-6-fluoro-4-oxo-1,4-dihydroquinoline-3-carboxylic acid **2d**

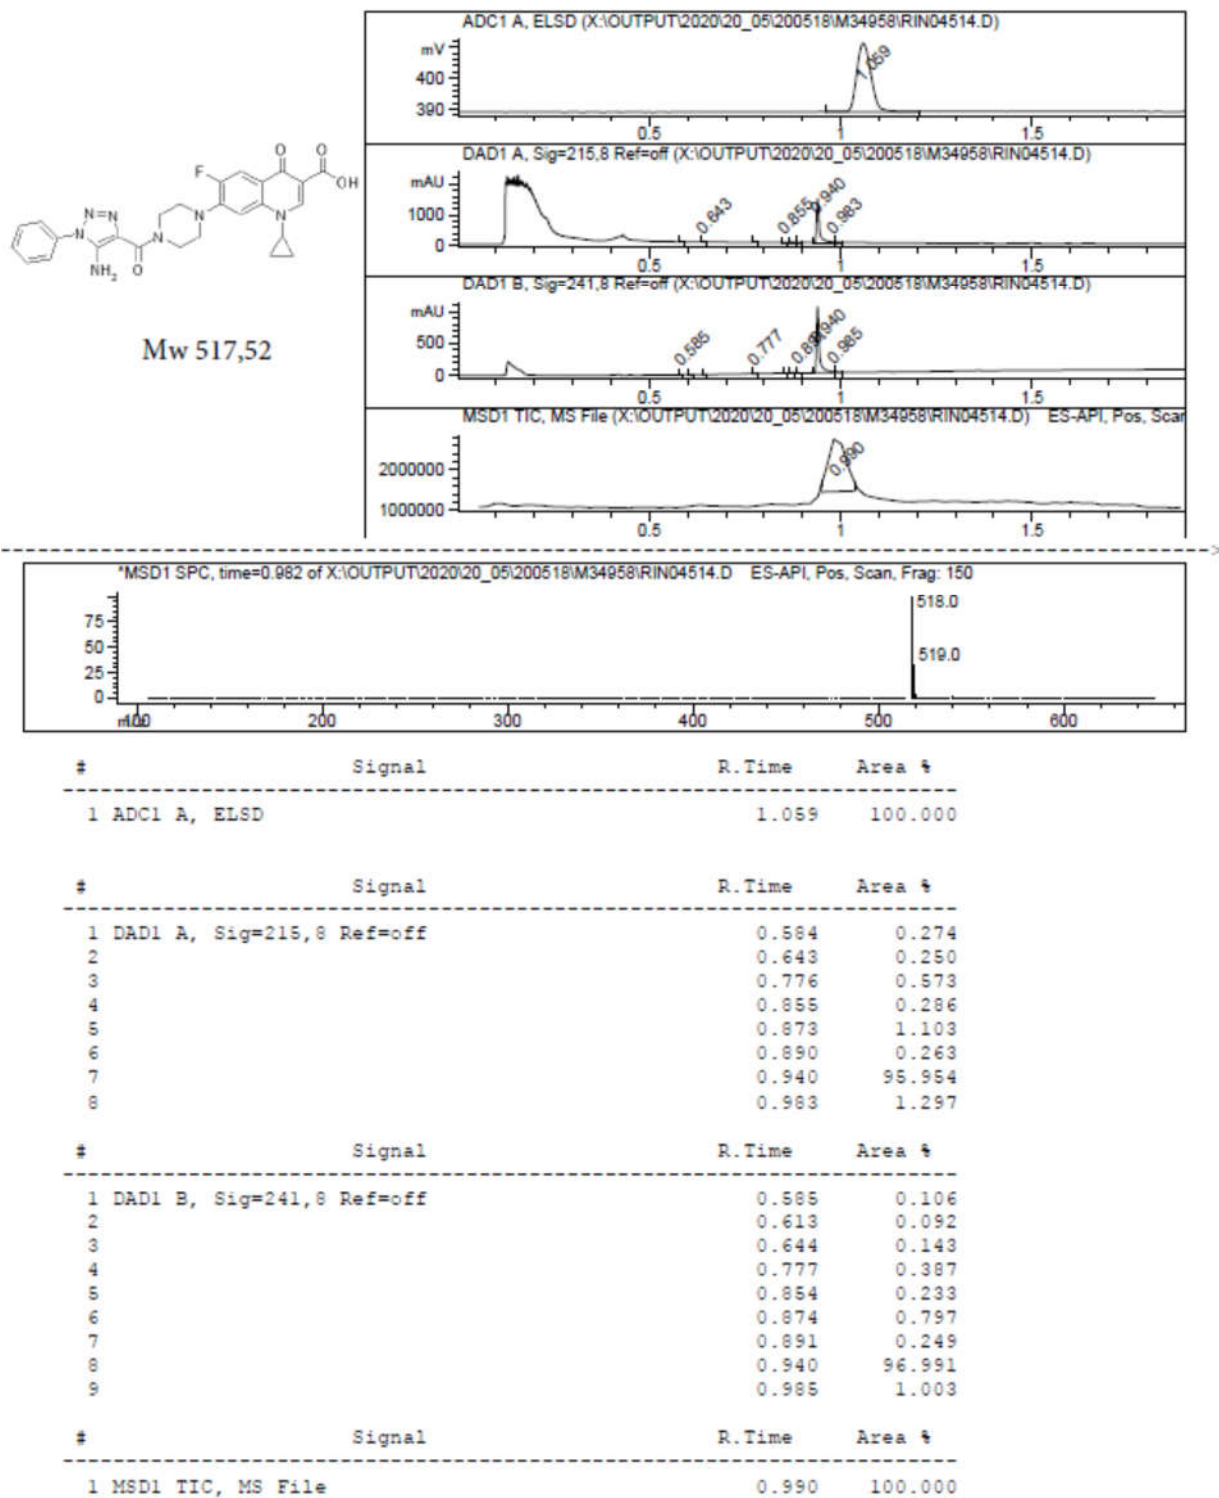

**Figure S25.** LC/MS data for 7-(4-(5-amino-1-phenyl-1H-1,2,3-triazole-4-carbonyl)piperazin-1-yl)-1-cyclopropyl-6-fluoro-4-oxo-1,4-dihydroquinoline-3-carboxylic acid **2d**

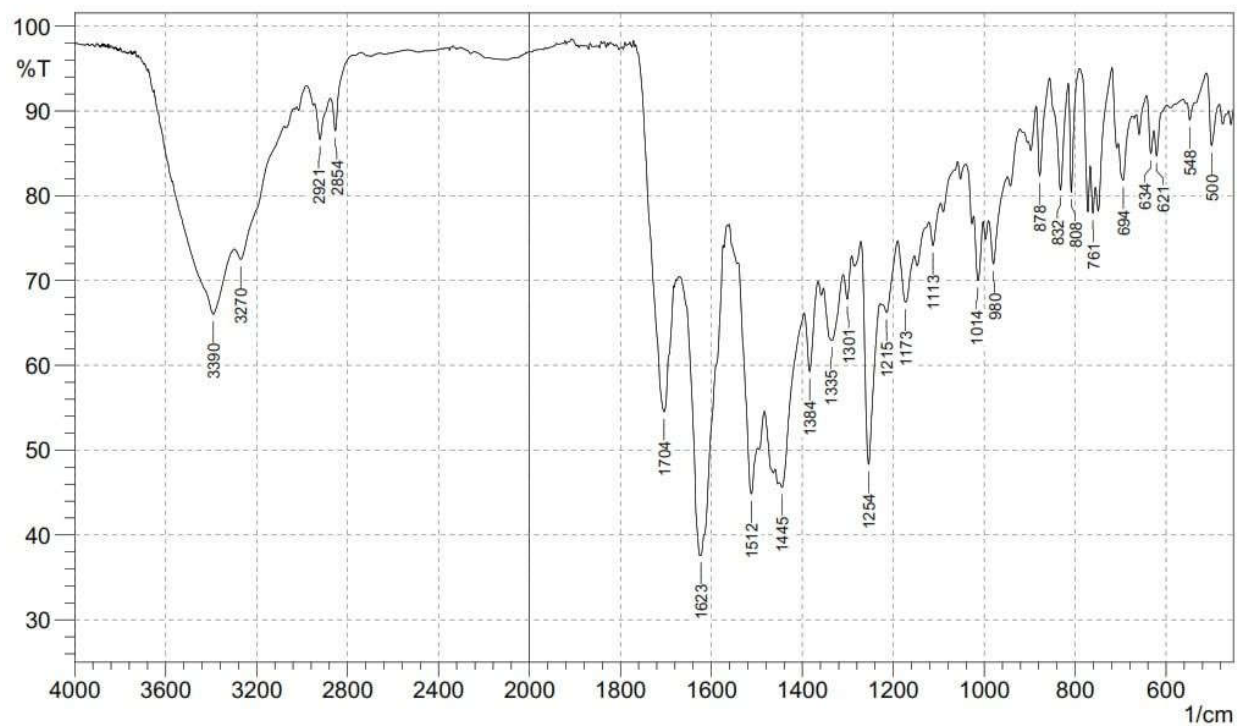

**Figure S26.** IR spectrum of 7-(4-(5-amino-1-phenyl-1H-1,2,3-triazole-4-carbonyl)piperazin-1-yl)-1-cyclopropyl-6-fluoro-4-oxo-1,4-dihydroquinoline-3-carboxylic acid **2d**

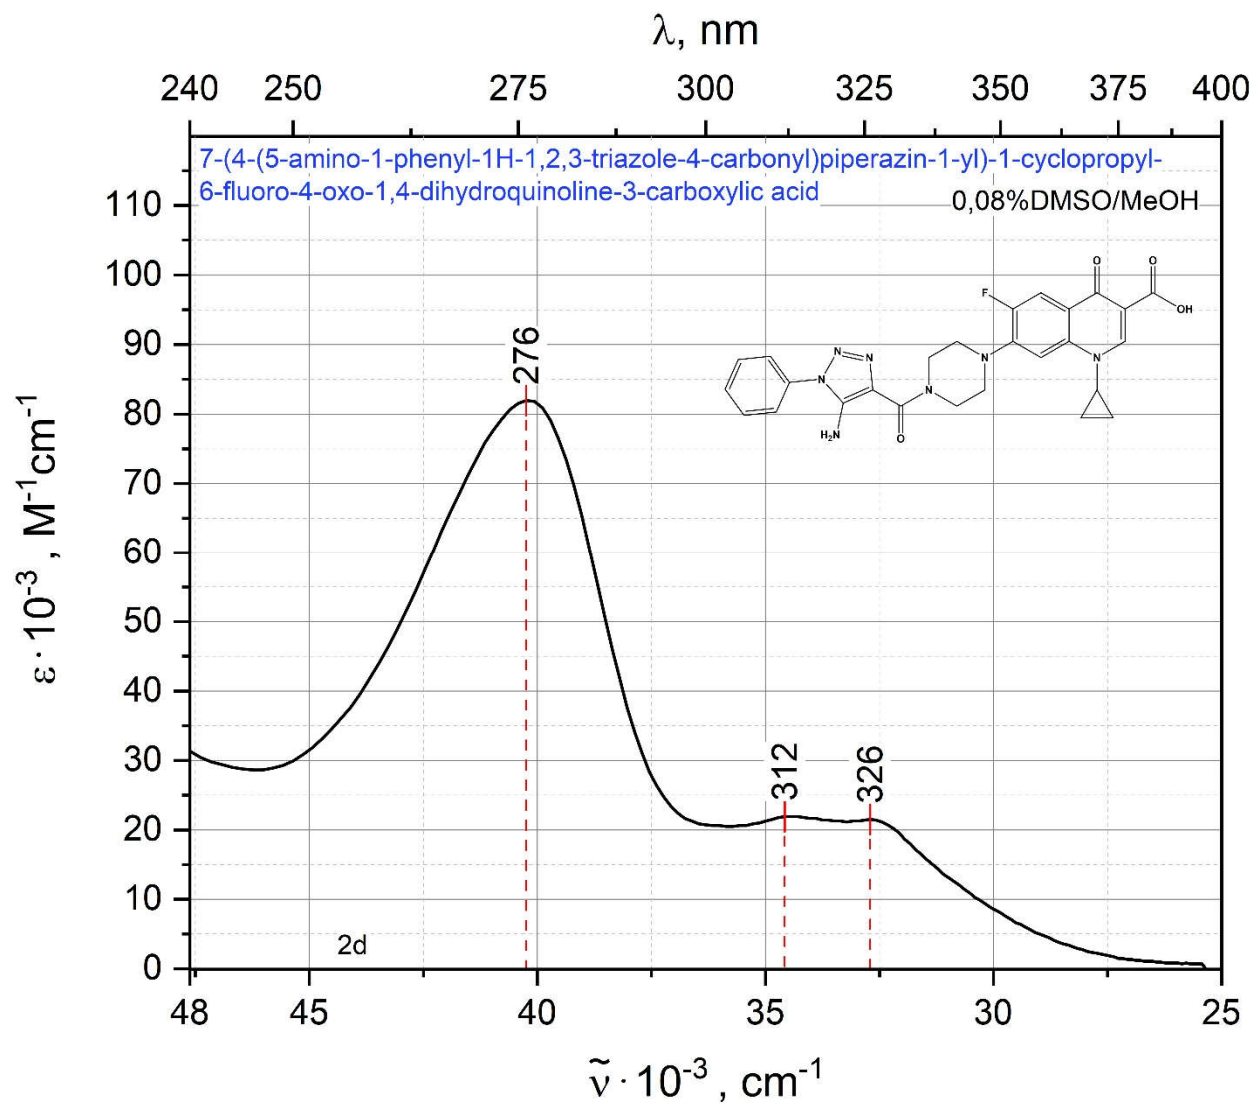

**Figure S27.** UV/Vis spectrum of 7-(4-(5-amino-1-phenyl-1H-1,2,3-triazole-4-carbonyl)piperazin-1-yl)-1-cyclopropyl-6-fluoro-4-oxo-1,4-dihydroquinoline-3-carboxylic acid **2d** (0,08%DMSO/MeOH)

**7-(4-(5-amino-1-(2-methylphenyl)-1H-1,2,3-triazole-4-carbonyl)piperazin-1-yl)-1-cyclopropyl-6-fluoro-4-oxo-1,4-dihydroquinoline-3-carboxylic acid 2e**

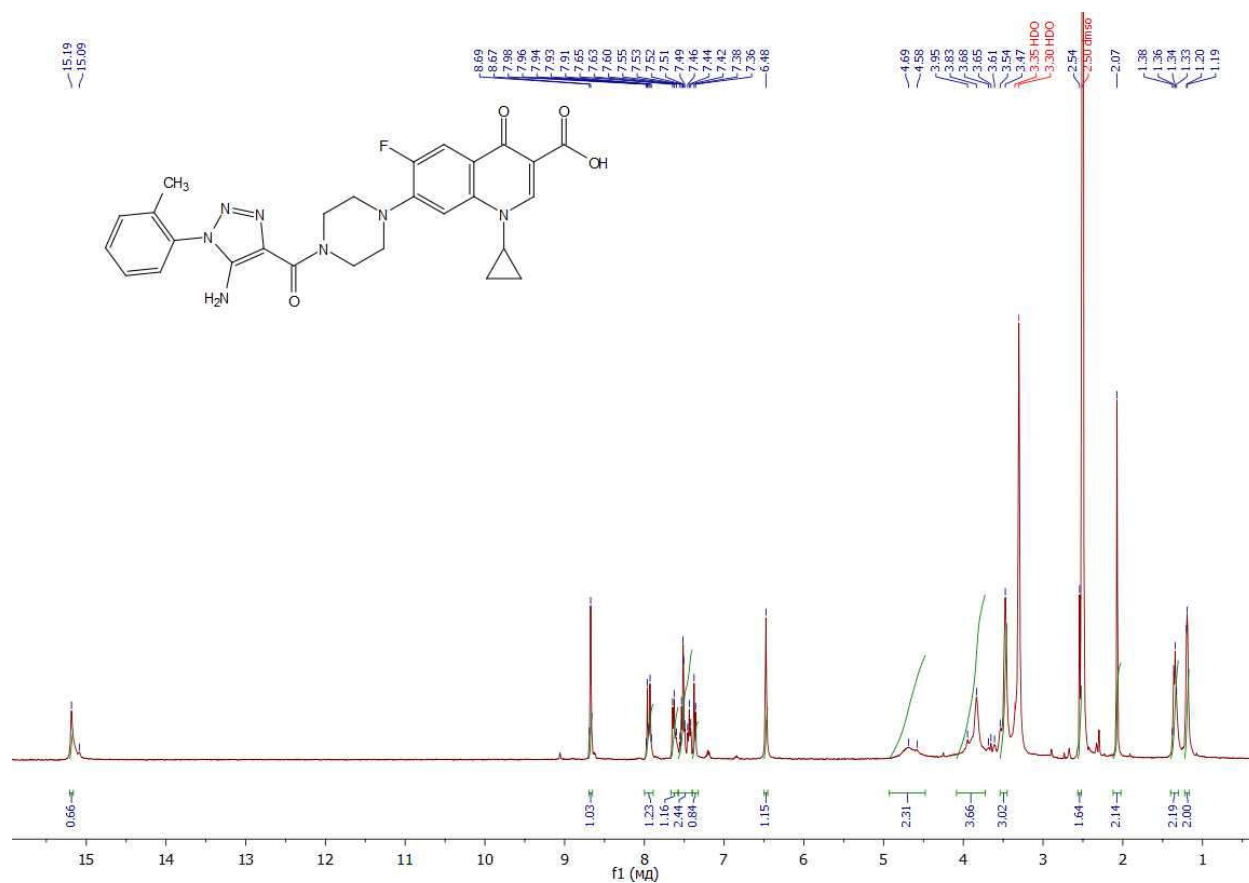

**Figure S28.** <sup>1</sup>H NMR spectrum (400 MHz, DMSO-d<sub>6</sub>) of 7-(4-(5-amino-1-(2-methylphenyl)-1H-1,2,3-triazole-4-carbonyl)piperazin-1-yl)-1-cyclopropyl-6-fluoro-4-oxo-1,4-dihydroquinoline-3-carboxylic acid **2e**

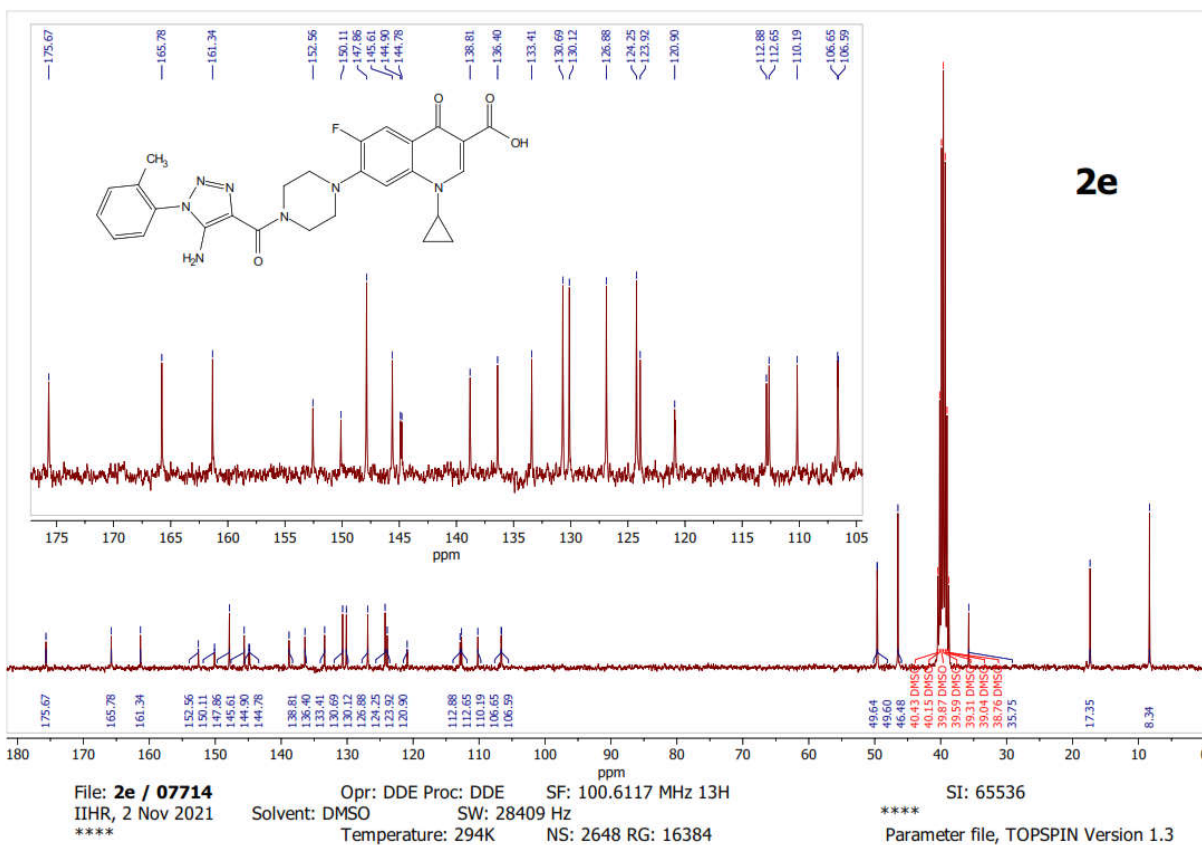

**Figure S29.**  $^{13}\text{C}$  NMR spectrum (100 MHz, DMSO- $d_6$ ) of 7-(4-(5-amino-1-(2-methylphenyl)-1H-1,2,3-triazole-4-carbonyl)piperazin-1-yl)-1-cyclopropyl-6-fluoro-4-oxo-1,4-dihydroquinoline-3-carboxylic acid **2e**

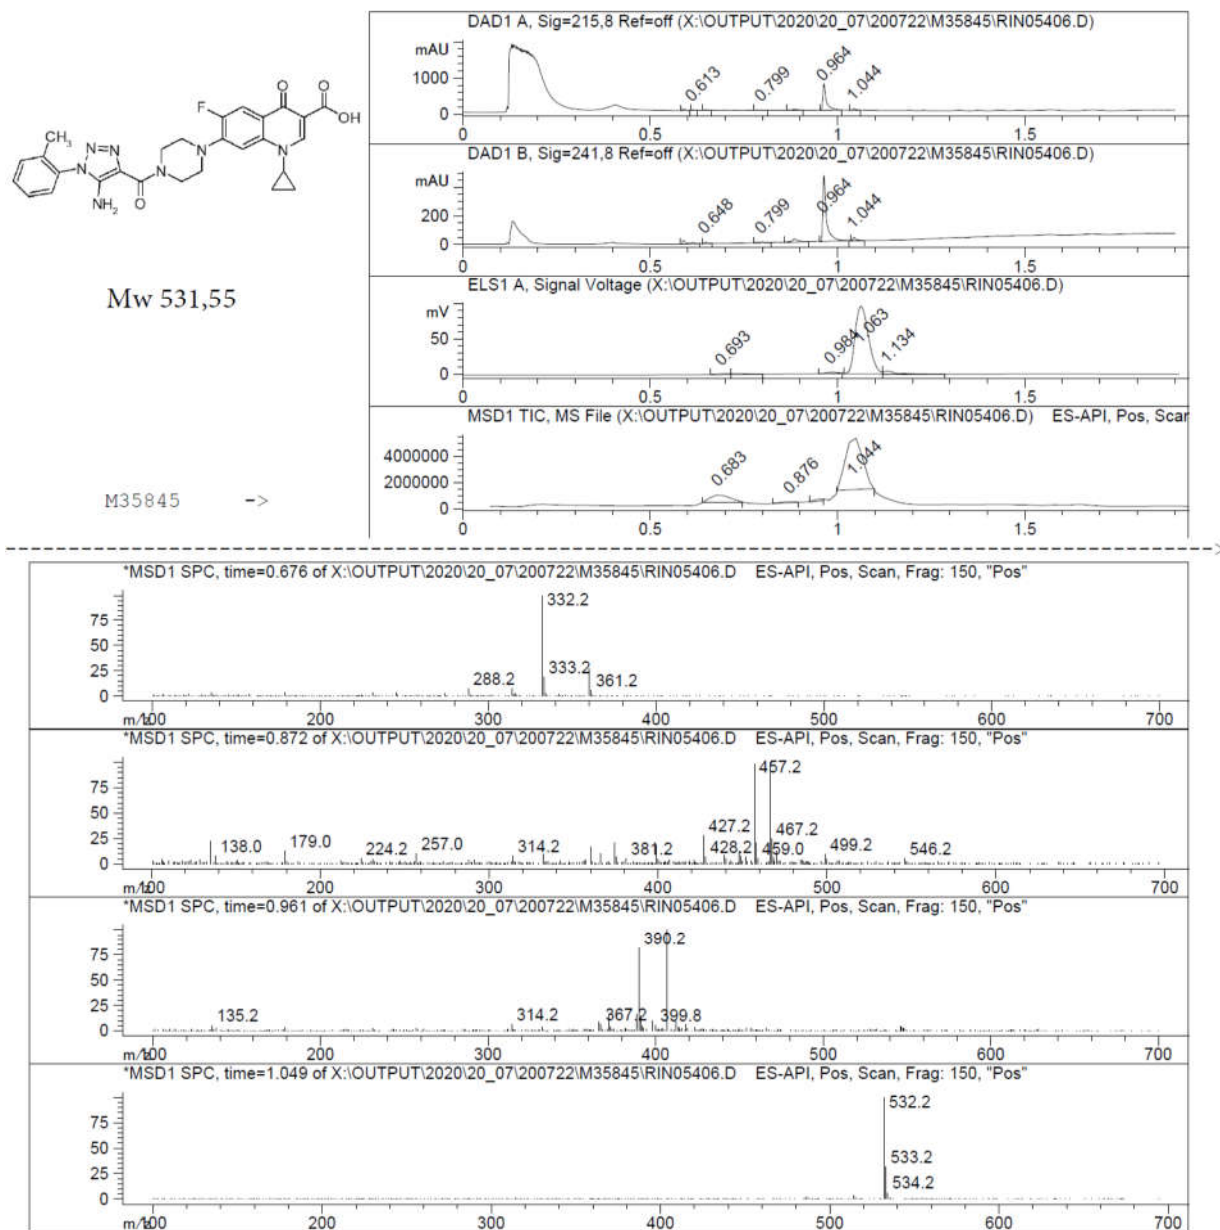

**Figure S30.** LC/MS data for 7-(4-(5-amino-1-(2-methylphenyl)-1H-1,2,3-triazole-4-carbonyl)piperazin-1-yl)-1-cyclopropyl-6-fluoro-4-oxo-1,4-dihydroquinoline-3-carboxylic acid **2e**



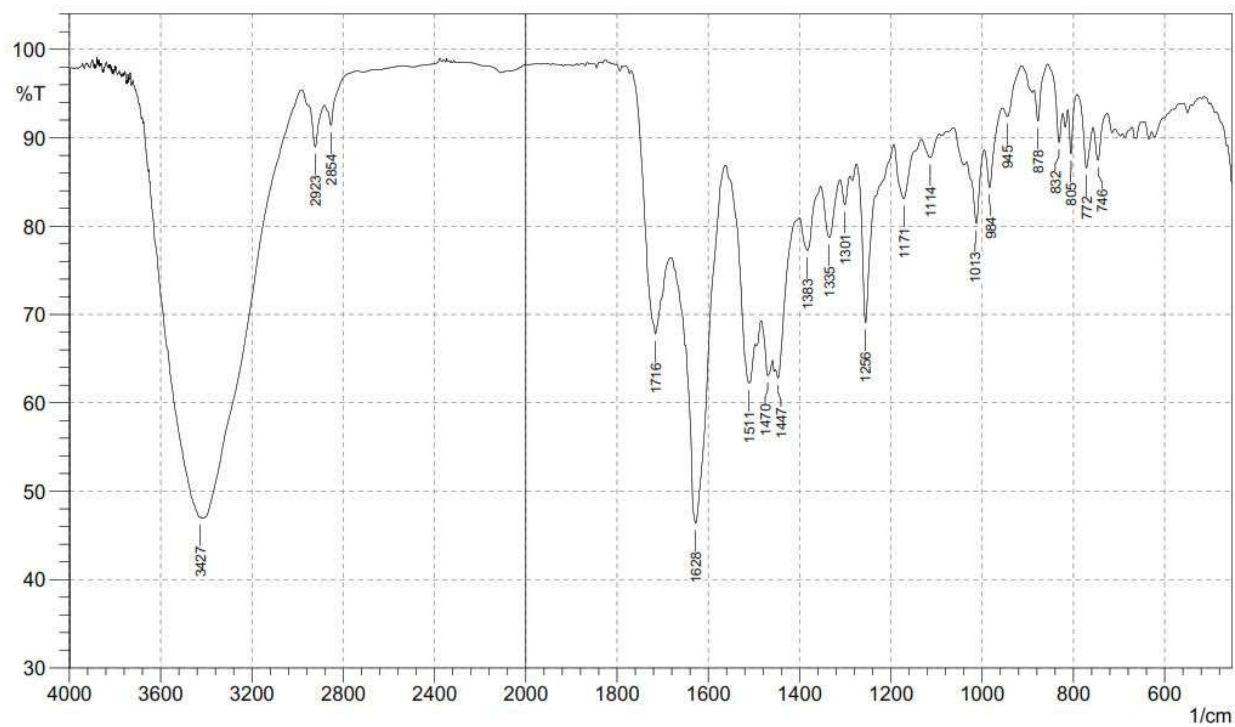

**Figure S31.** IR spectrum of 7-(4-(5-amino-1-(2-methylphenyl)-1H-1,2,3-triazole-4-carbonyl)piperazin-1-yl)-1-cyclopropyl-6-fluoro-4-oxo-1,4-dihydroquinoline-3-carboxylic acid **2e**



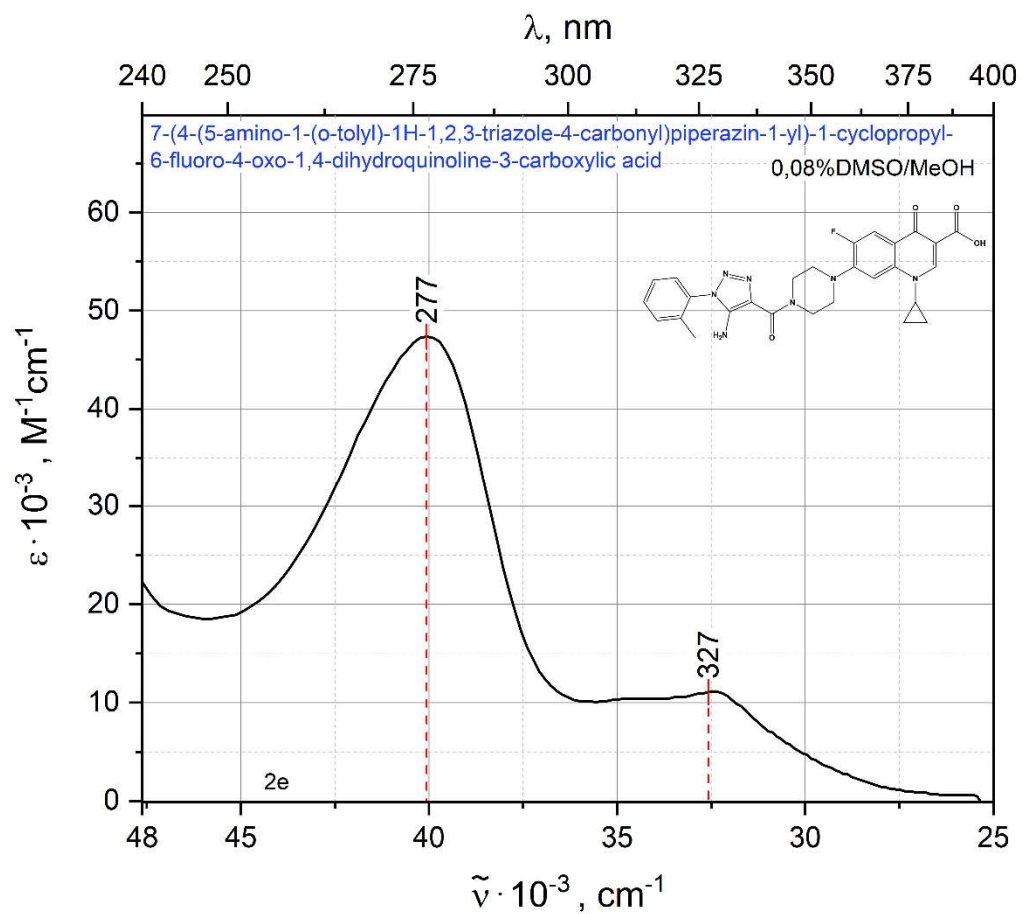

**Figure S32.** UV/Vis spectrum of 7-(4-(5-amino-1-(2-methylphenyl)-1H-1,2,3-triazole-4-carbonyl)piperazin-1-yl)-1-cyclopropyl-6-fluoro-4-oxo-1,4-dihydroquinoline-3-carboxylic acid **2e** (0,08% DMSO/MeOH)

**7-(4-(5-amino-1-(4-ethylphenyl)-1H-1,2,3-triazole-4-carbonyl)piperazin-1-yl)-1-cyclopropyl-6-fluoro-4-oxo-1,4-dihydroquinoline-3-carboxylic acid 2f**

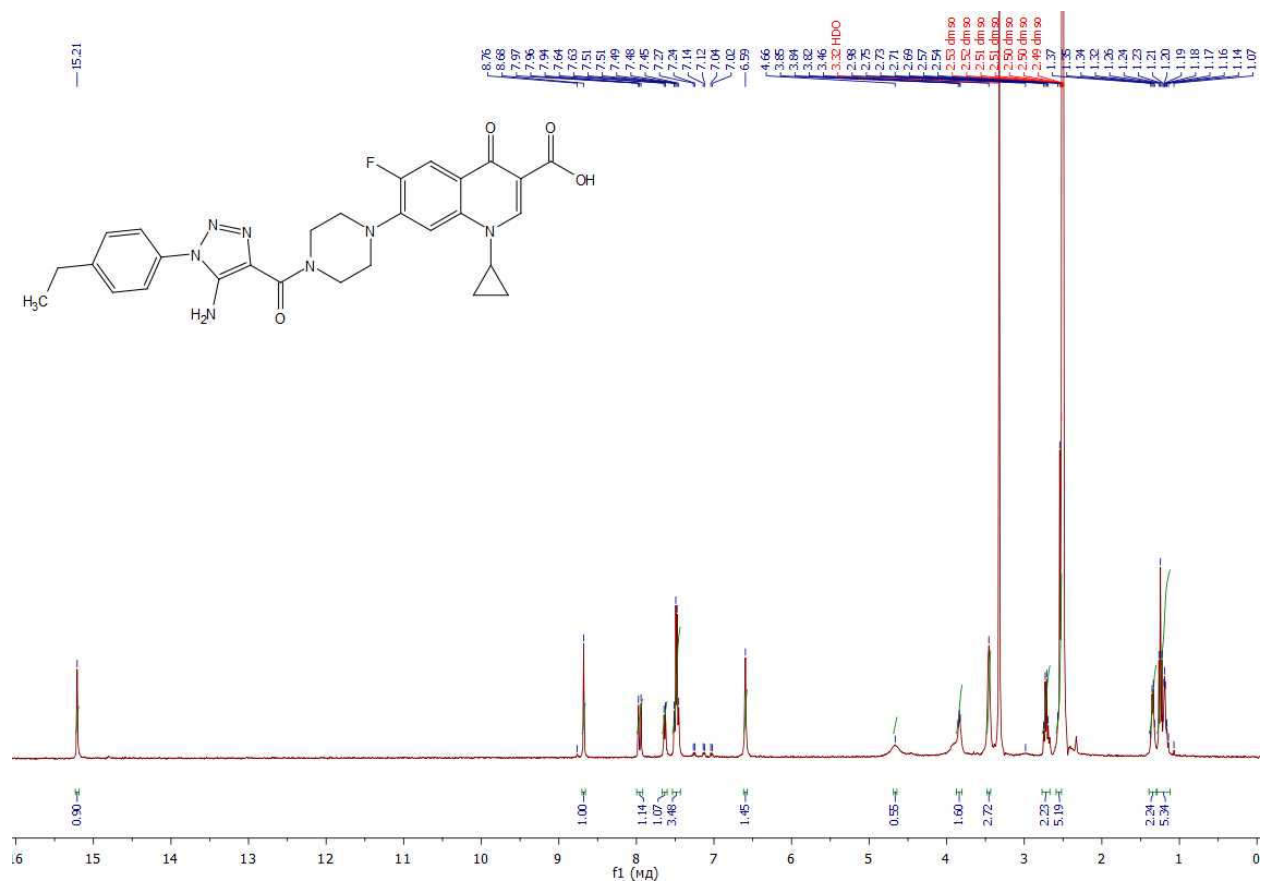

**Figure S33.** <sup>1</sup>H NMR spectrum (400 MHz, DMSO-d<sub>6</sub>) of 7-(4-(5-amino-1-(4-ethylphenyl)-1H-1,2,3-triazole-4-carbonyl)piperazin-1-yl)-1-cyclopropyl-6-fluoro-4-oxo-1,4-dihydroquinoline-3-carboxylic acid 2f

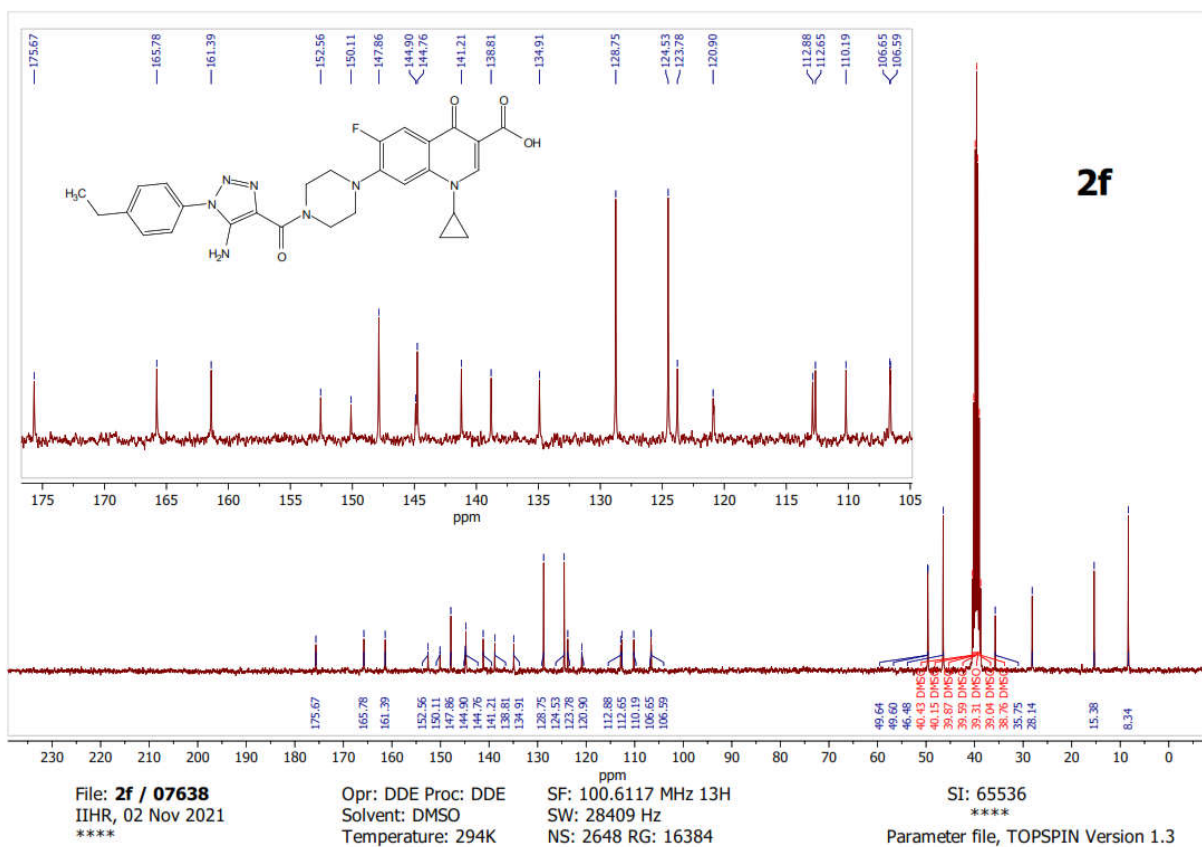

**Figure S34.**  $^{13}\text{C}$  NMR spectrum (100 MHz, DMSO- $d_6$ ) of 7-(4-(5-amino-1-(4-ethylphenyl)-1H-1,2,3-triazole-4-carbonyl)piperazin-1-yl)-1-cyclopropyl-6-fluoro-4-oxo-1,4-dihydroquinoline-3-carboxylic acid

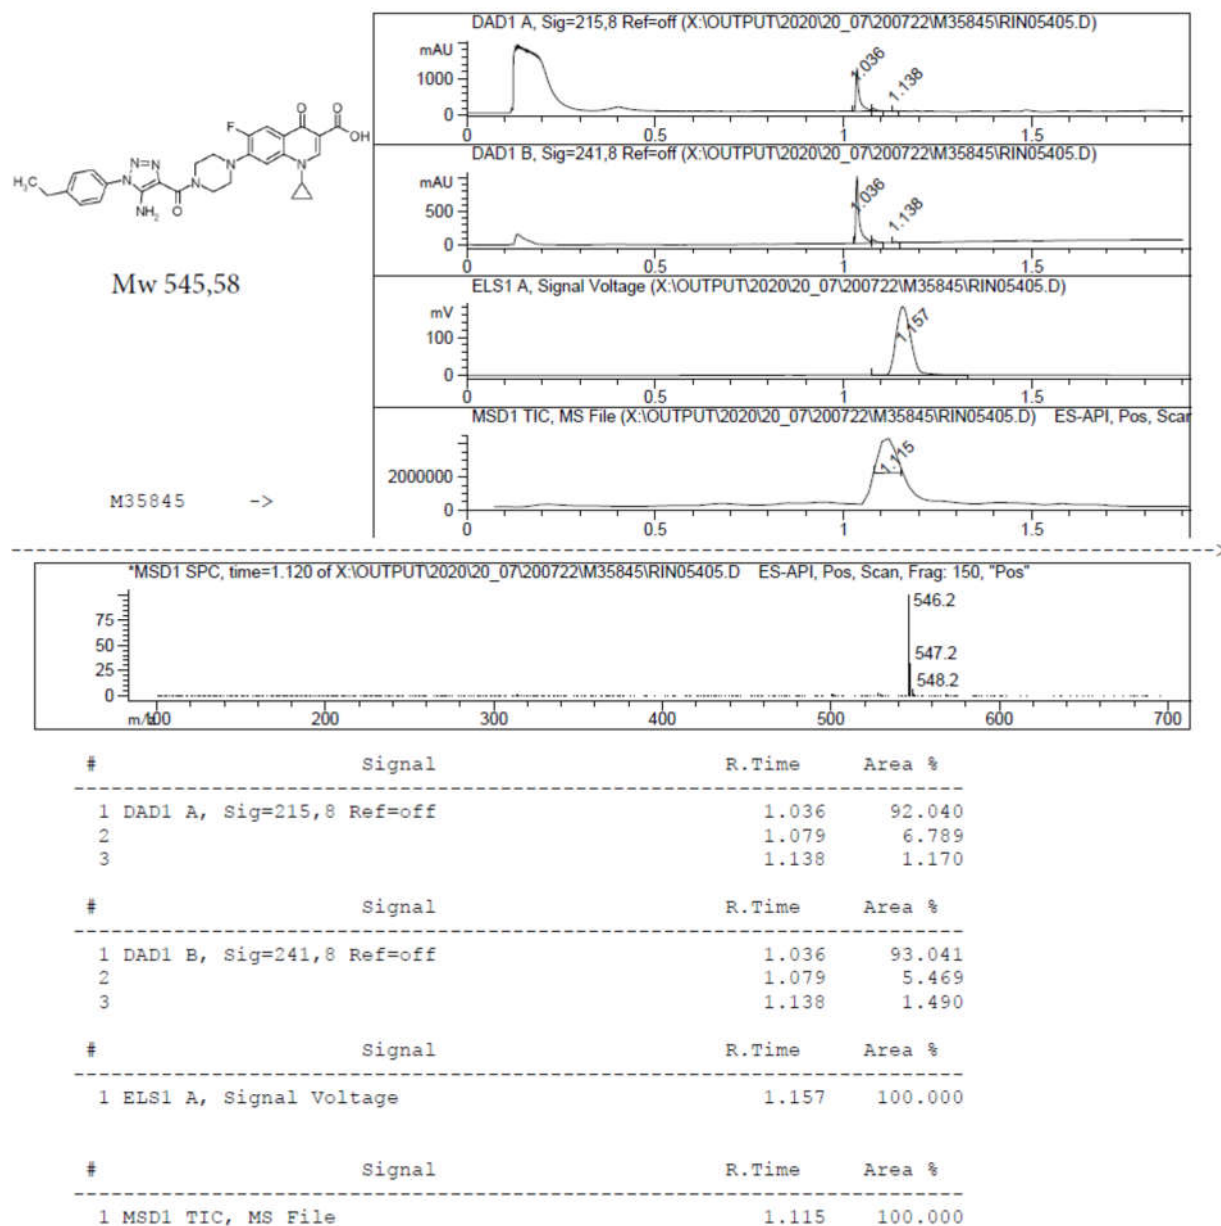

**Figure S35.** LC/MS data for 7-(4-(5-amino-1-(4-ethylphenyl)-1H-1,2,3-triazole-4-carbonyl)piperazin-1-yl)-1-cyclopropyl-6-fluoro-4-oxo-1,4-dihydroquinoline-3-carboxylic acid **2f**

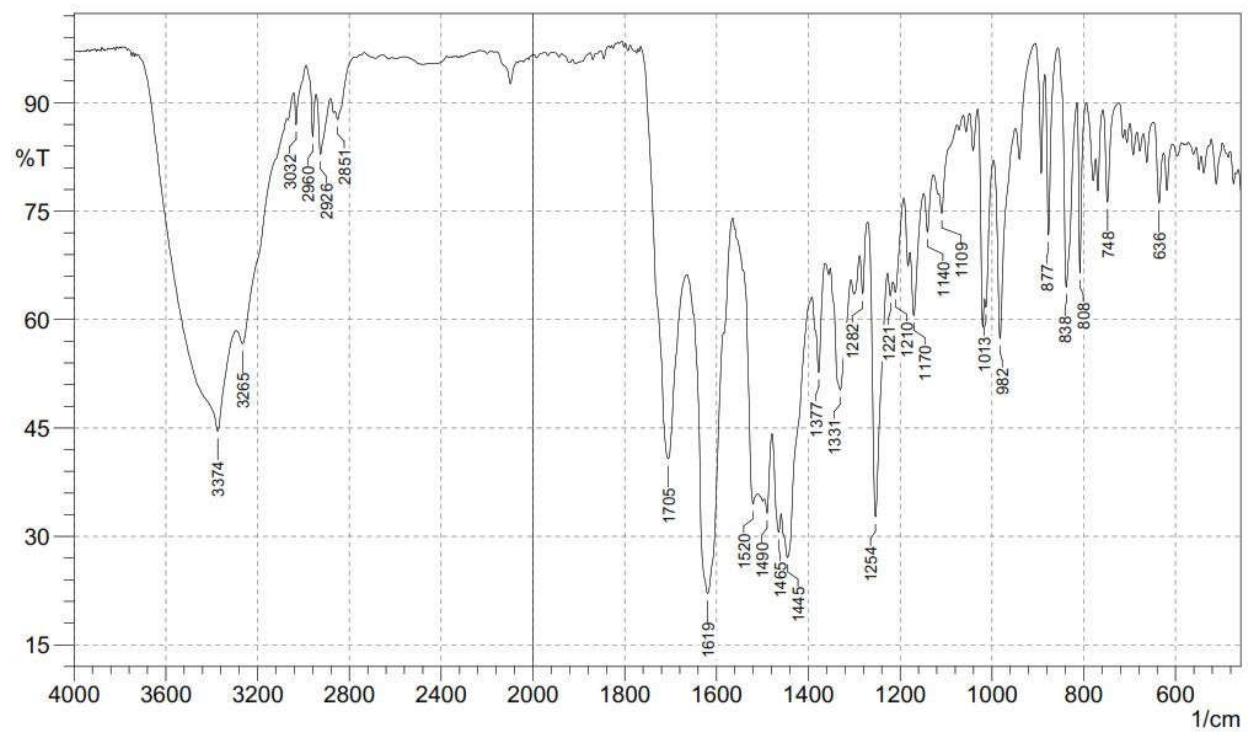

**Figure S36.** IR spectrum of 7-(4-(5-amino-1-(4-ethylphenyl)-1H-1,2,3-triazole-4-carbonyl)piperazin-1-yl)-1-cyclopropyl-6-fluoro-4-oxo-1,4-dihydroquinoline-3-carboxylic acid **2f**

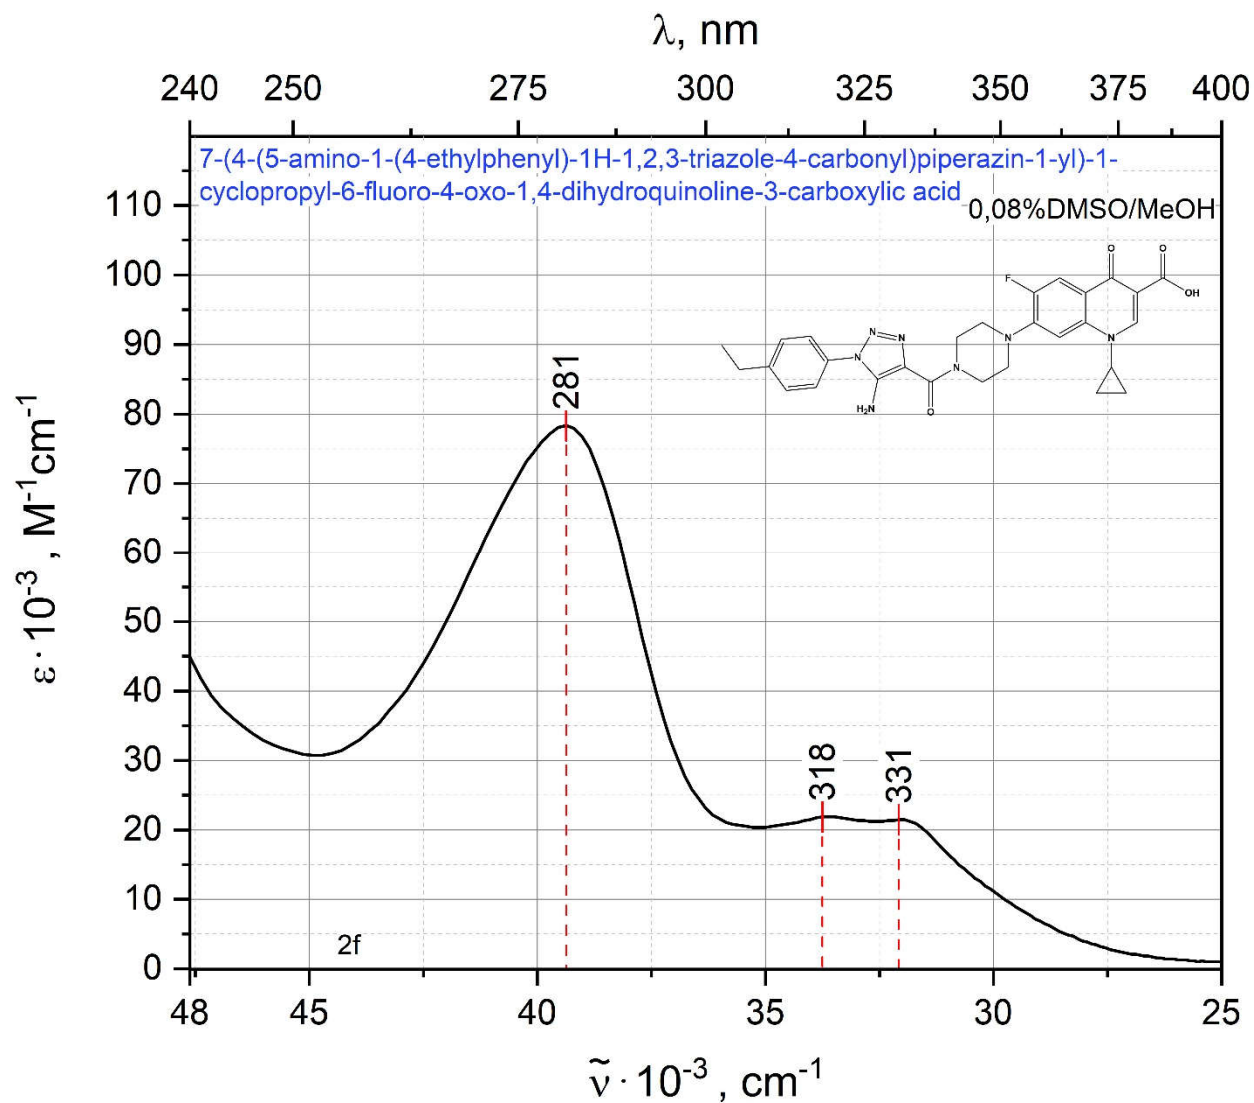

**Figure S37.** UV/Vis spectrum of 7-(4-(5-amino-1-(4-ethylphenyl)-1H-1,2,3-triazole-4-carbonyl)piperazin-1-yl)-1-cyclopropyl-6-fluoro-4-oxo-1,4-dihydroquinoline-3-carboxylic acid **2f** (0.08% DMSO/MeOH)

[illegible]

39

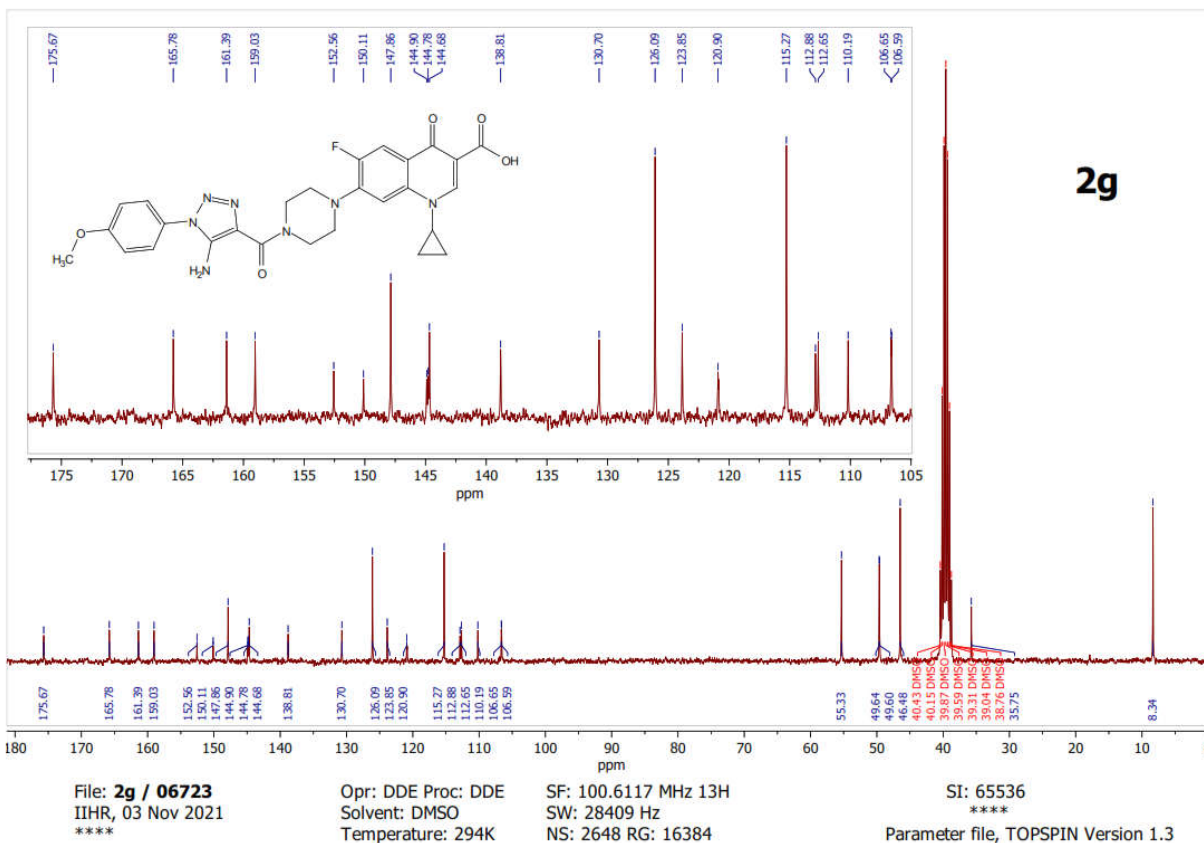

**Figure S39.**  $^{13}\text{C}$  NMR spectrum (100 MHz, DMSO- $d_6$ ) of 7-(4-(5-amino-1-(4-methoxyphenyl)-1H-1,2,3-triazole-4-carbonyl)piperazin-1-yl)-1-cyclopropyl-6-fluoro-4-oxo-1,4-dihydroquinoline-3-carboxylic acid **2g**



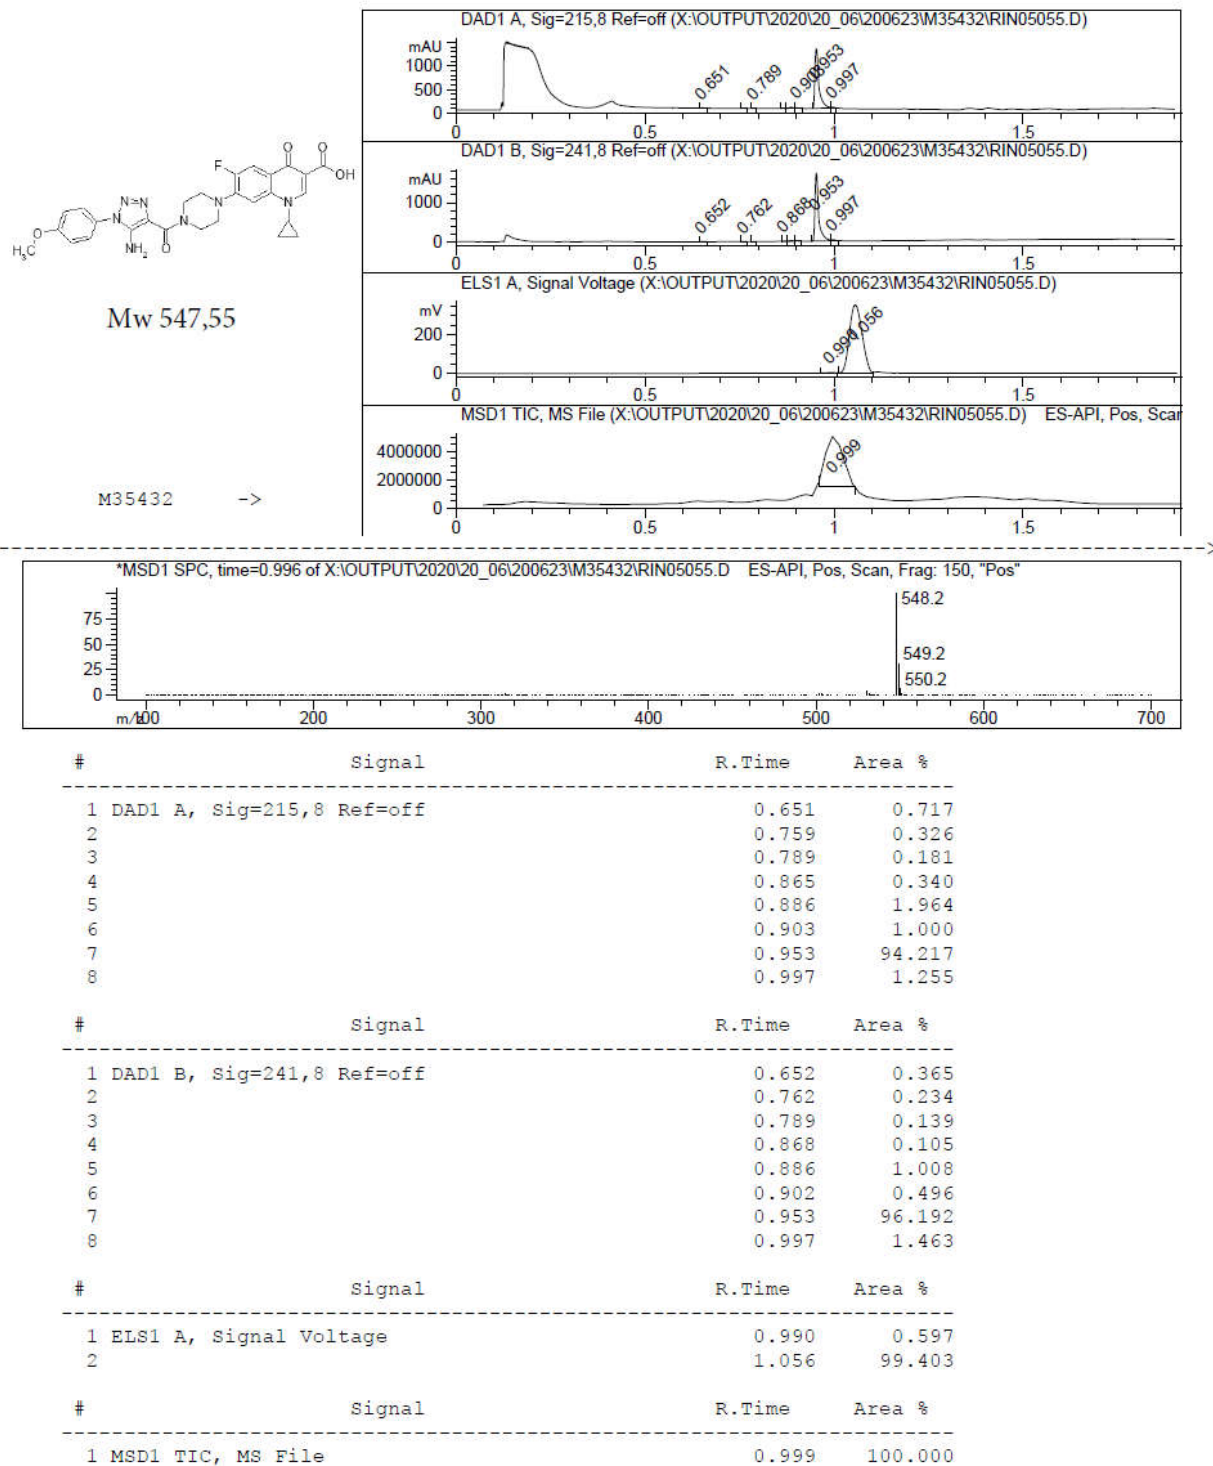

**Figure S40.** LC/MS data for 7-(4-(5-amino-1-(4-methoxyphenyl)-1H-1,2,3-triazole-4-carbonyl)piperazin-1-yl)-1-cyclopropyl-6-fluoro-4-oxo-1,4-dihydroquinoline-3-carboxylic acid **2g**

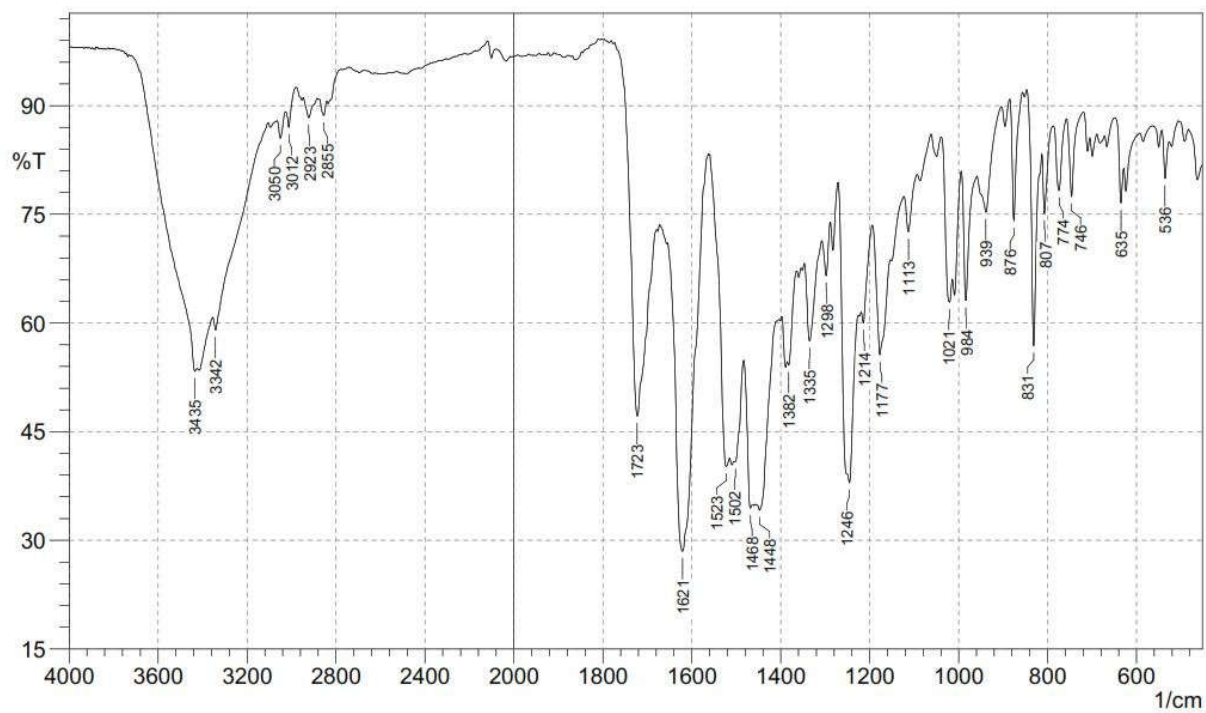

**Figure S41.** IR spectrum of 7-(4-(5-amino-1-(4-methoxyphenyl)-1H-1,2,3-triazole-4-carbonyl)piperazin-1-yl)-1-cyclopropyl-6-fluoro-4-oxo-1,4-dihydroquinoline-3-carboxylic acid **2g**

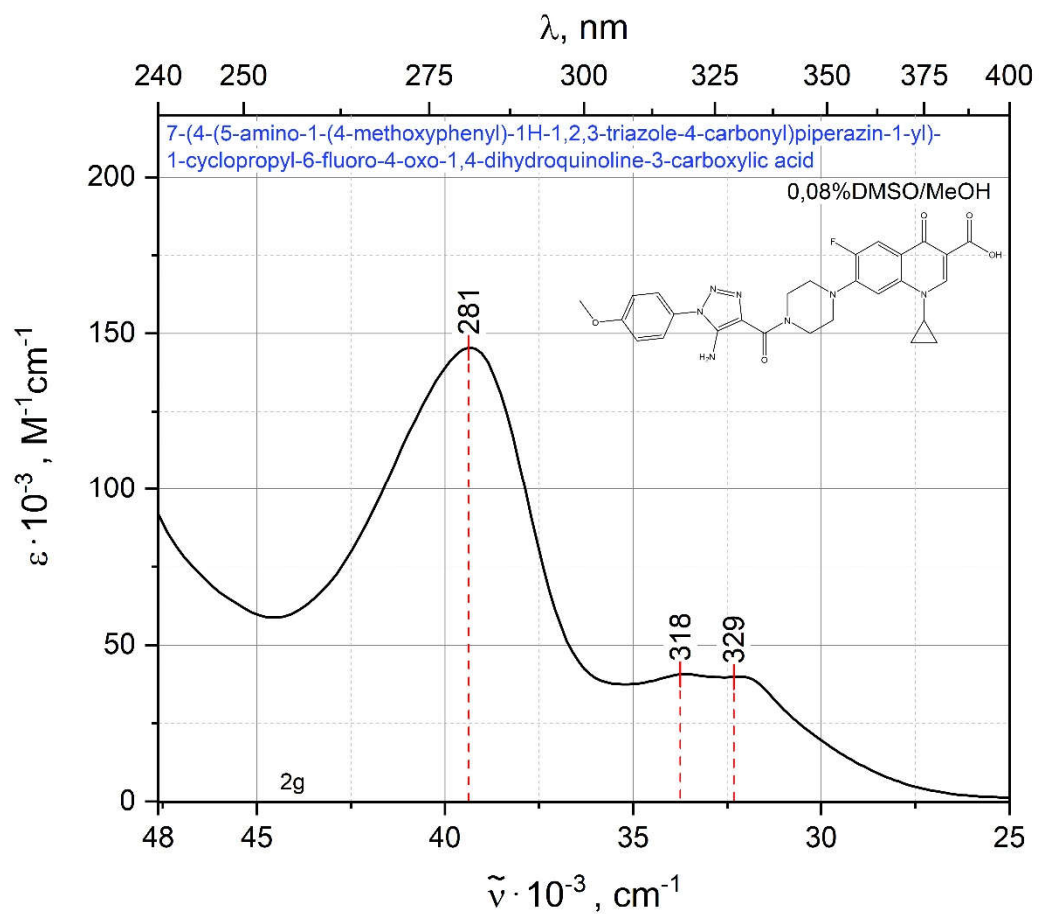

**Figure S42.** UV/Vis spectrum of 7-(4-(5-amino-1-(4-methoxyphenyl)-1H-1,2,3-triazole-4-carbonyl)piperazin-1-yl)-1-cyclopropyl-6-fluoro-4-oxo-1,4-dihydroquinoline-3-carboxylic acid **2g** (0.08% DMSO/MeOH)

**7-(4-(5-amino-1-(4-(methylthio)phenyl)-1H-1,2,3-triazole-4-carbonyl)piperazin-1-yl)-1-cyclopropyl-6-fluoro-4-oxo-1,4-dihydroquinoline-3-carboxylic acid **2h****

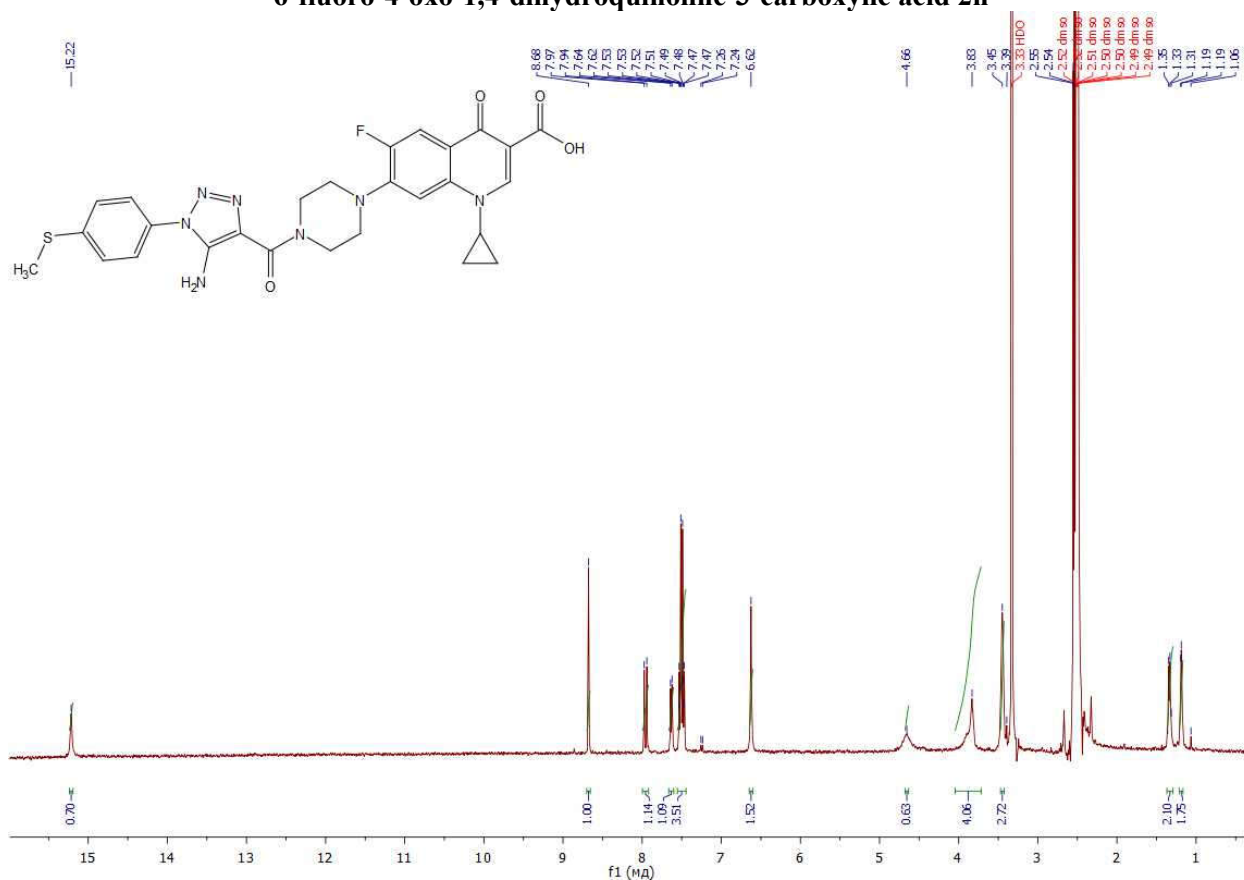

**Figure S43.** <sup>1</sup>H NMR spectrum (400 MHz, DMSO-d<sub>6</sub>) of 7-(4-(5-amino-1-(4-(methylthio)phenyl)-1H-1,2,3-triazole-4-carbonyl)piperazin-1-yl)-1-cyclopropyl-6-fluoro-4-oxo-1,4-dihydroquinoline-3-carboxylic acid **2h**

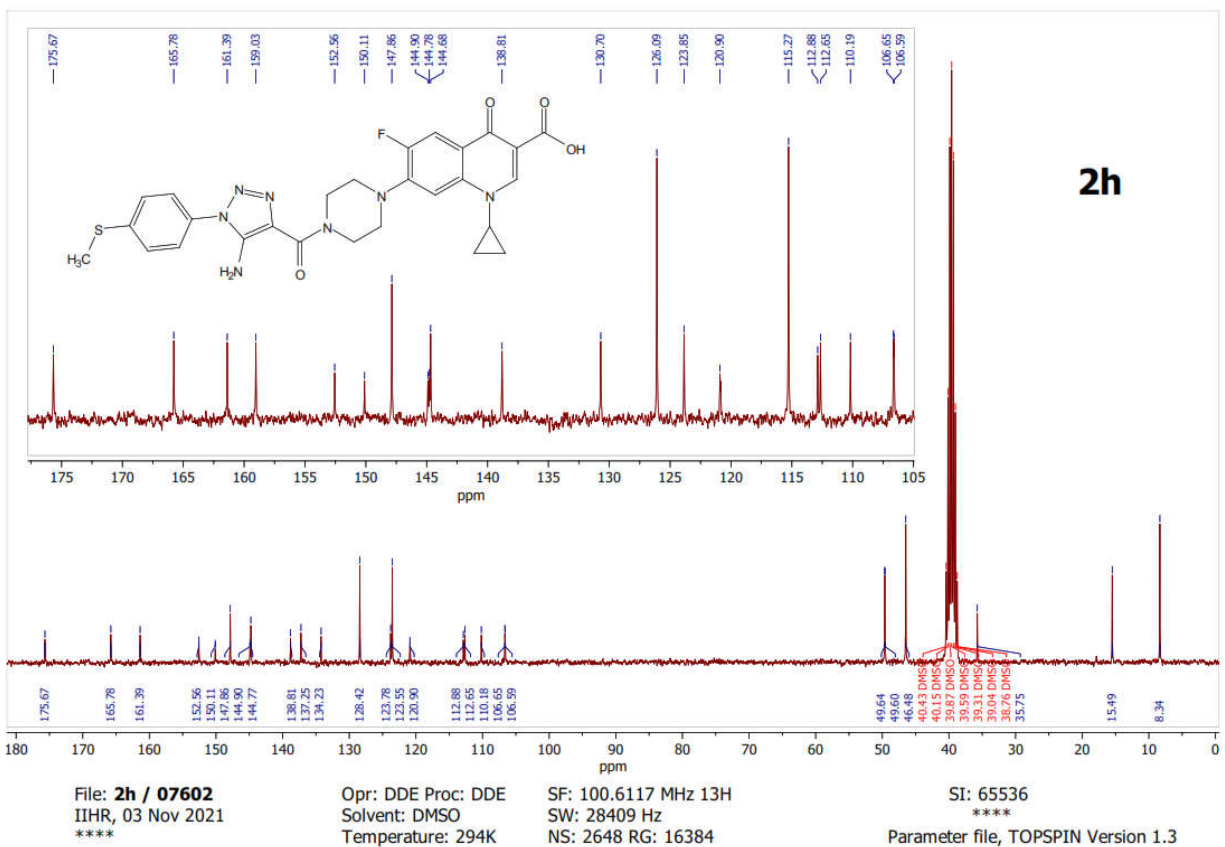

**Figure S44.** <sup>13</sup>C NMR spectrum (100 MHz, DMSO-d<sub>6</sub>) of 7-(4-(5-amino-1-(4-(methylthio)phenyl)-1H-1,2,3-triazole-4-carbonyl)piperazin-1-yl)-1-cyclopropyl-6-fluoro-4-oxo-1,4-dihydroquinoline-3-carboxylic acid **2h**

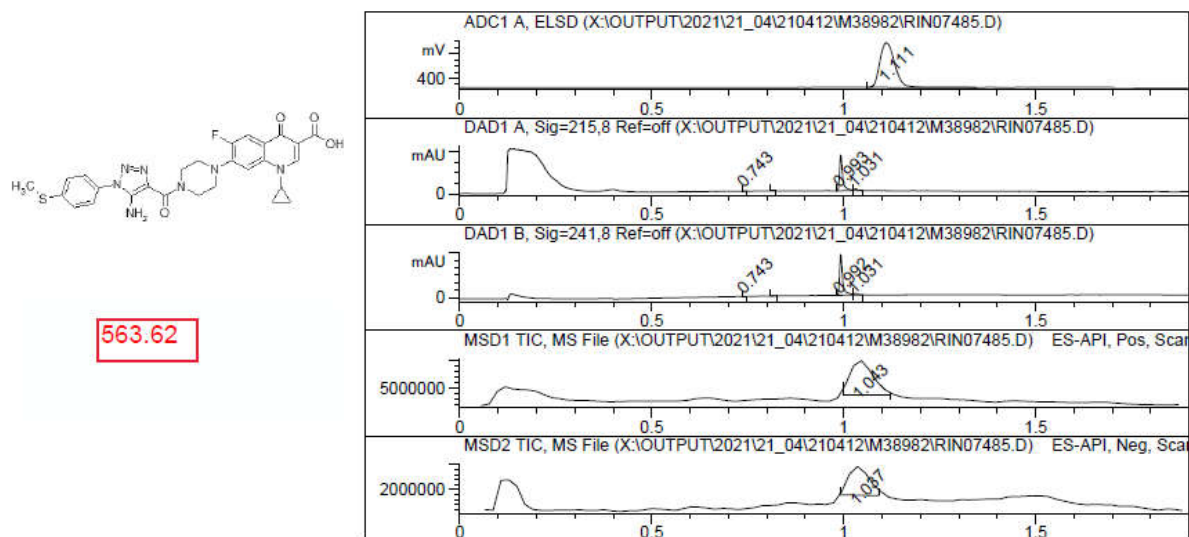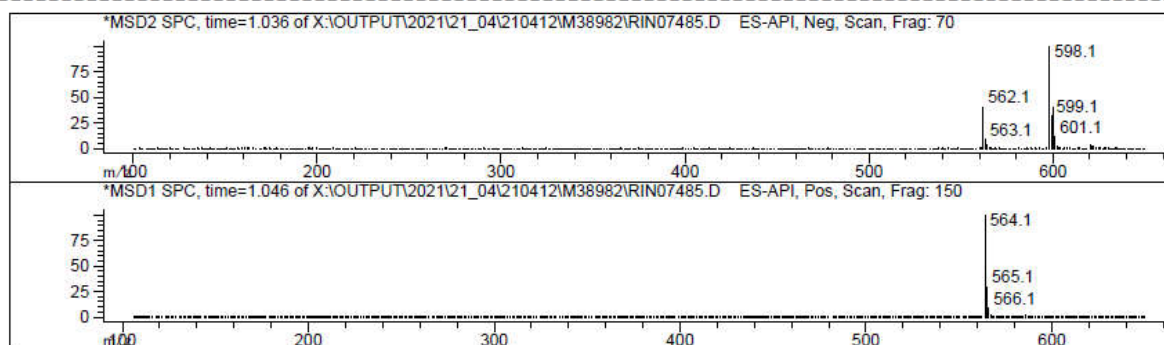

| # | Signal       | R.Time | Area %  |
|---|--------------|--------|---------|
| 1 | ADC1 A, ELSD | 1.111  | 100.000 |

  

| # | Signal                    | R.Time | Area % |
|---|---------------------------|--------|--------|
| 1 | DAD1 A, Sig=215,8 Ref=off | 0.743  | 0.371  |
| 2 |                           | 0.816  | 0.483  |
| 3 |                           | 0.993  | 93.632 |
| 4 |                           | 1.031  | 5.514  |

  

| # | Signal                    | R.Time | Area % |
|---|---------------------------|--------|--------|
| 1 | DAD1 B, Sig=241,8 Ref=off | 0.743  | 0.383  |
| 2 |                           | 0.816  | 0.591  |
| 3 |                           | 0.992  | 94.412 |
| 4 |                           | 1.031  | 4.614  |

  

| # | Signal            | R.Time | Area %  |
|---|-------------------|--------|---------|
| 1 | MSD1 TIC, MS File | 1.043  | 100.000 |

**Figure S45.** LC/MS data for 7-(4-(5-amino-1-(4-(methylthio)phenyl)-1H-1,2,3-triazole-4-carbonyl)piperazin-1-yl)-1-cyclopropyl-6-fluoro-4-oxo-1,4-dihydroquinoline-3-carboxylic acid **2h**

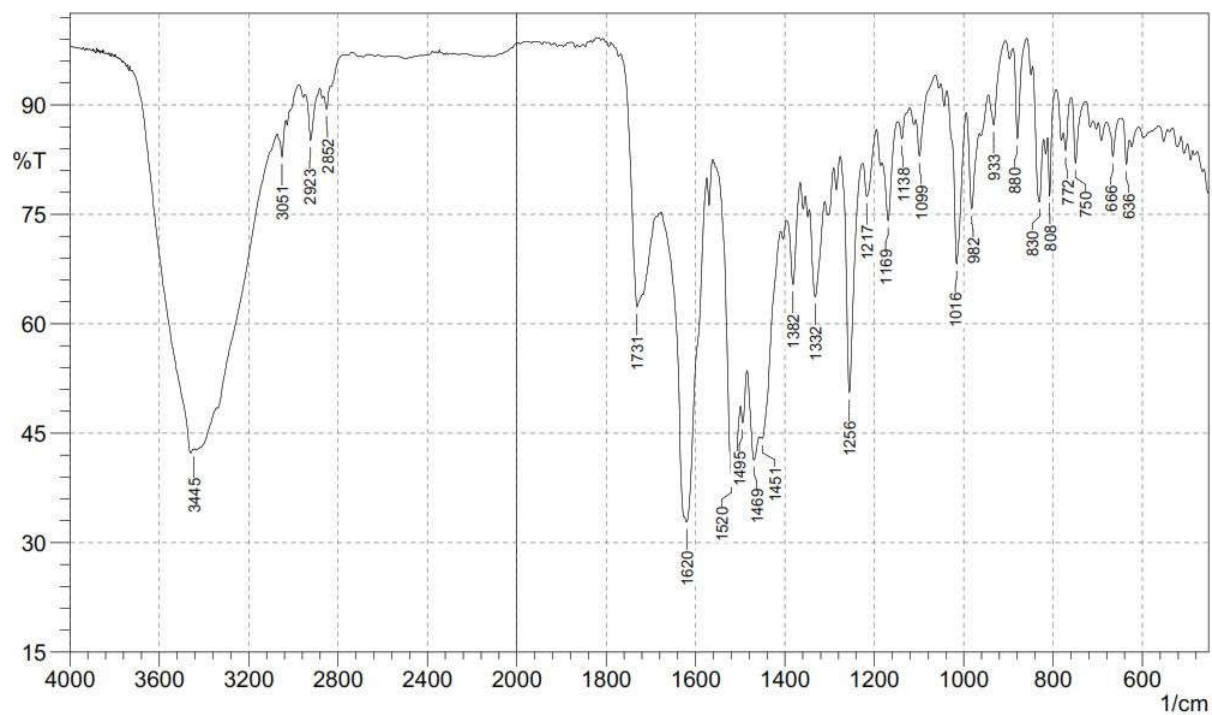

**Figure S46.** IR spectrum of 7-(4-(5-amino-1-(4-(methylthio)phenyl)-1H-1,2,3-triazole-4-carbonyl)piperazin-1-yl)-1-cyclopropyl-6-fluoro-4-oxo-1,4-dihydroquinoline-3-carboxylic acid **2h**



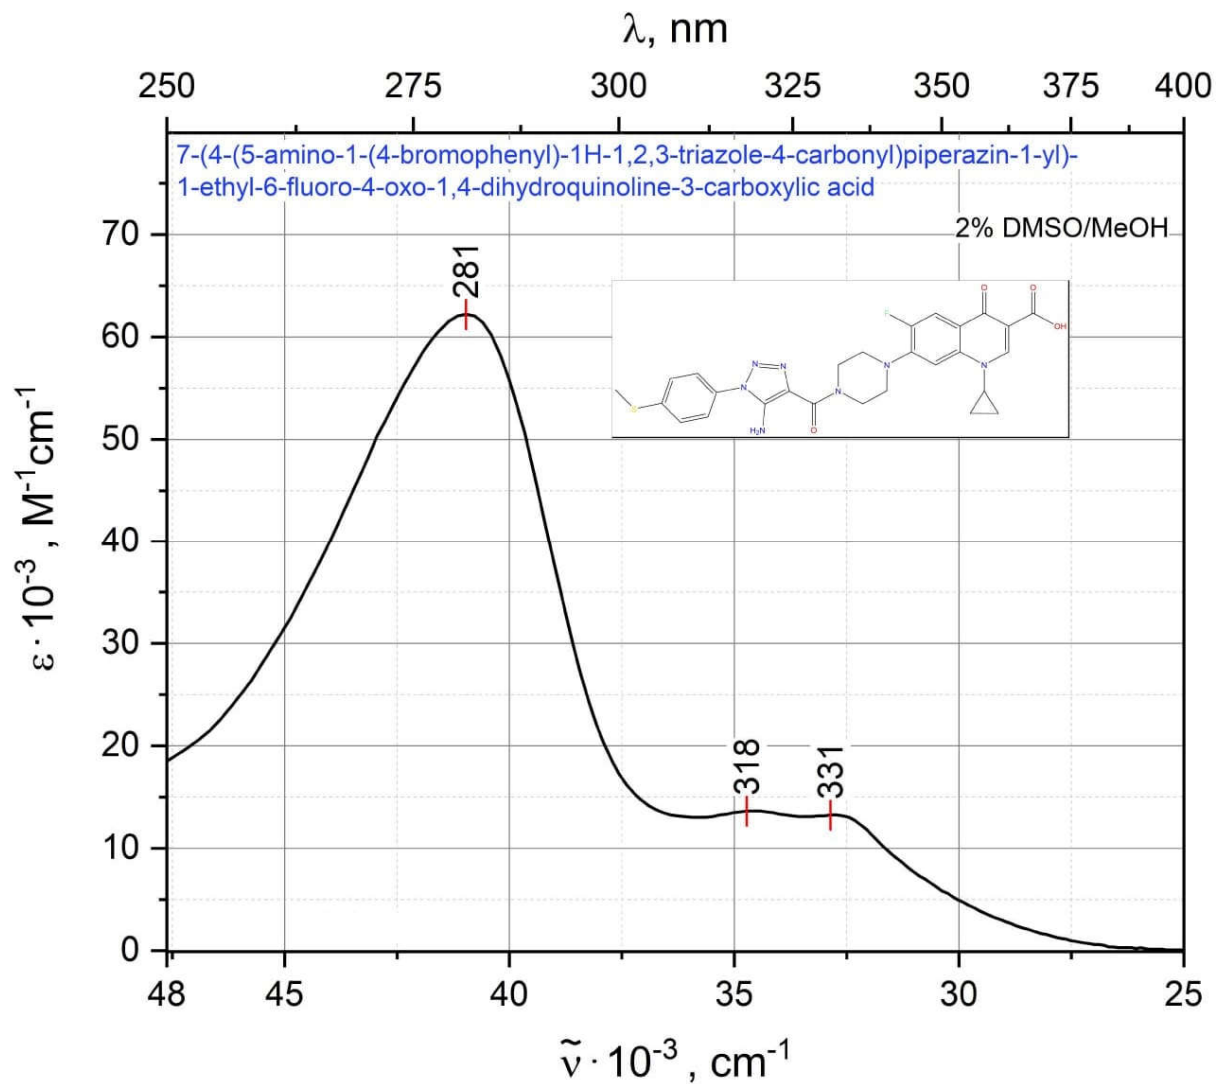

**Figure S47.** UV/Vis spectrum of 7-(4-(5-amino-1-(4-(methylthio)phenyl)-1H-1,2,3-triazole-4-carbonyl)piperazin-1-yl)-1-cyclopropyl-6-fluoro-4-oxo-1,4-dihydroquinoline-3-carboxylic acid **2h** (2%DMSO/MeOH)



**7-(4-(5-amino-1-(3-(methylthio)phenyl)-1H-1,2,3-triazole-4-carbonyl)piperazin-1-yl)-1-cyclopropyl-6-fluoro-4-oxo-1,4-dihydroquinoline-3-carboxylic acid **2i****

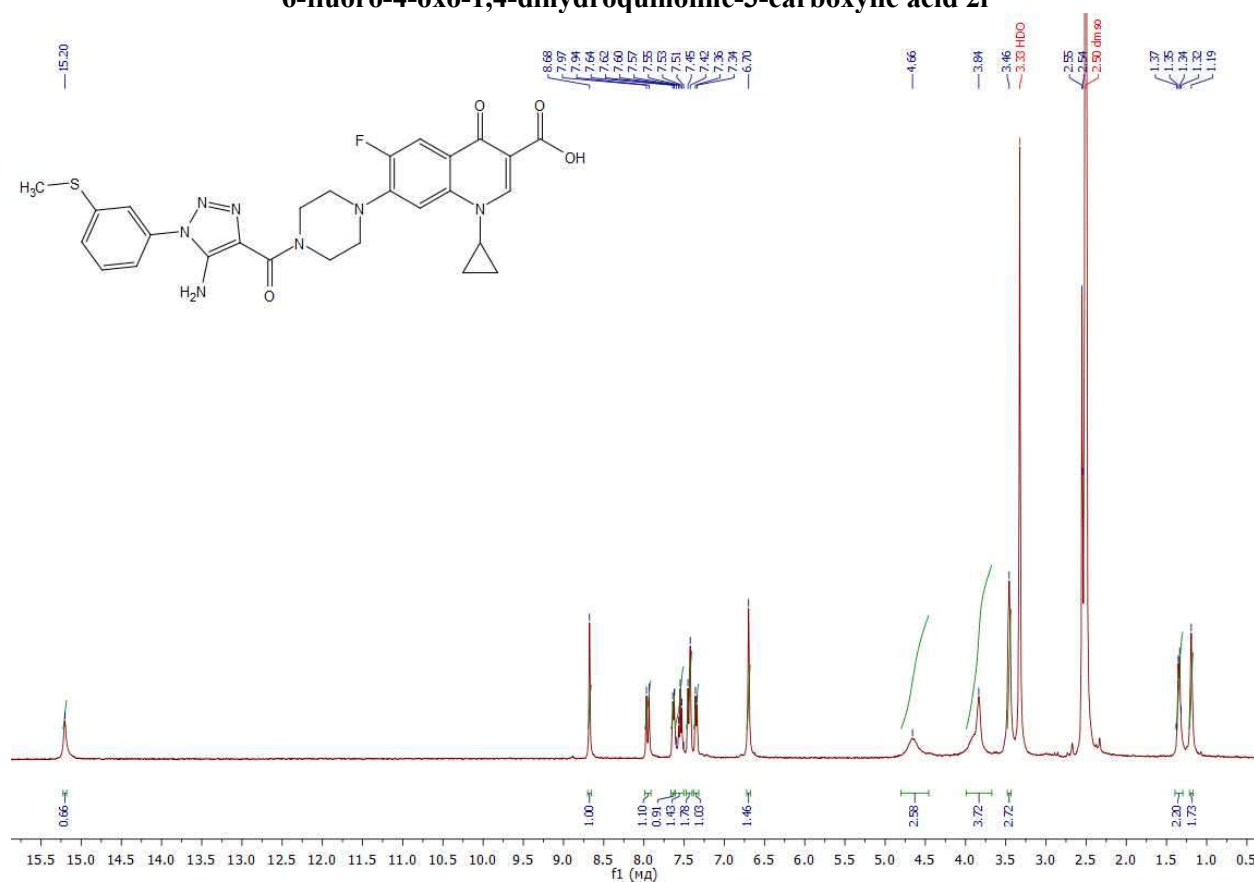

**Figure S48.** <sup>1</sup>H NMR spectrum (400 MHz, DMSO-d<sub>6</sub>) of 7-(4-(5-amino-1-(3-(methylthio)phenyl)-1H-1,2,3-triazole-4-carbonyl)piperazin-1-yl)-1-cyclopropyl-6-fluoro-4-oxo-1,4-dihydroquinoline-3-carboxylic acid **2i**

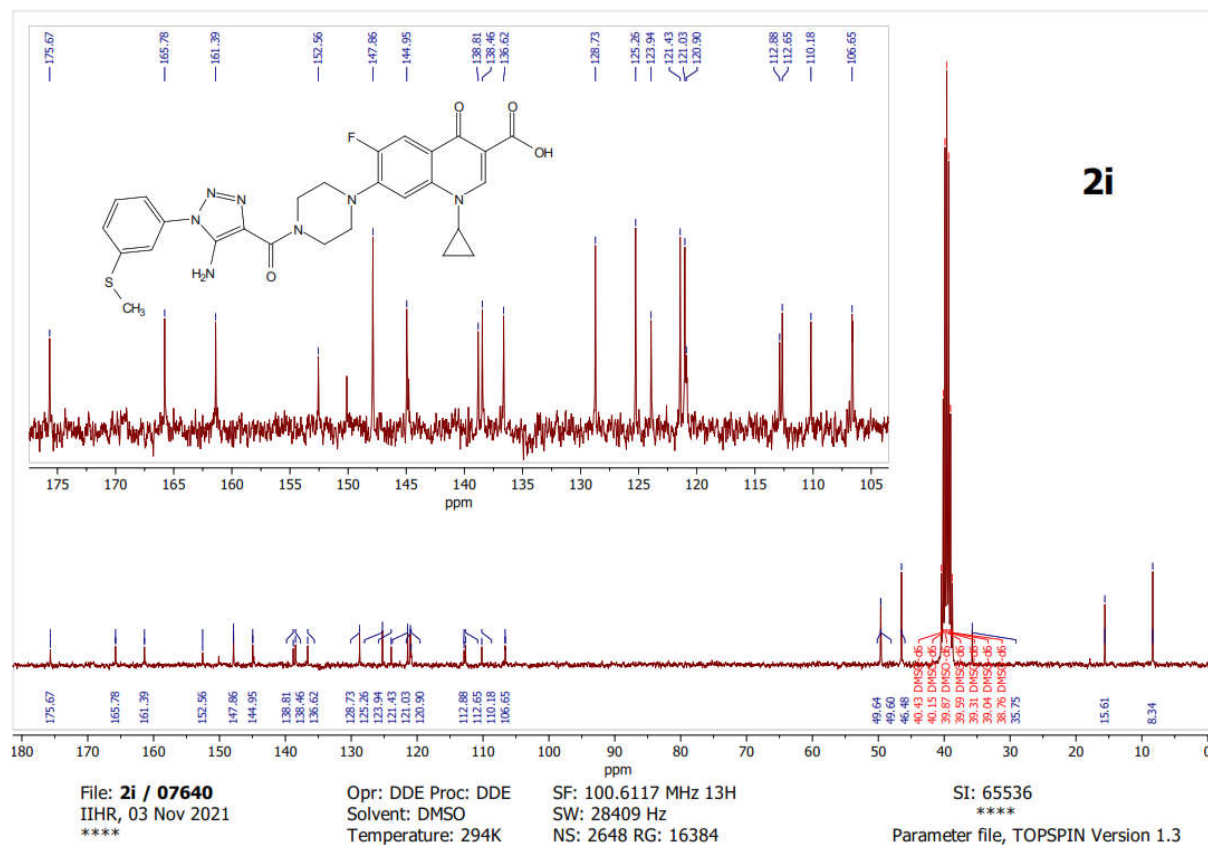

**Figure S49.** <sup>13</sup>C NMR spectrum (100 MHz, DMSO-d<sub>6</sub>) of 7-(4-(5-amino-1-(3-(methylthio)phenyl)-1H-1,2,3-triazole-4-carbonyl)piperazin-1-yl)-1-cyclopropyl-6-fluoro-4-oxo-1,4-dihydroquinoline-3-carboxylic acid **2i**

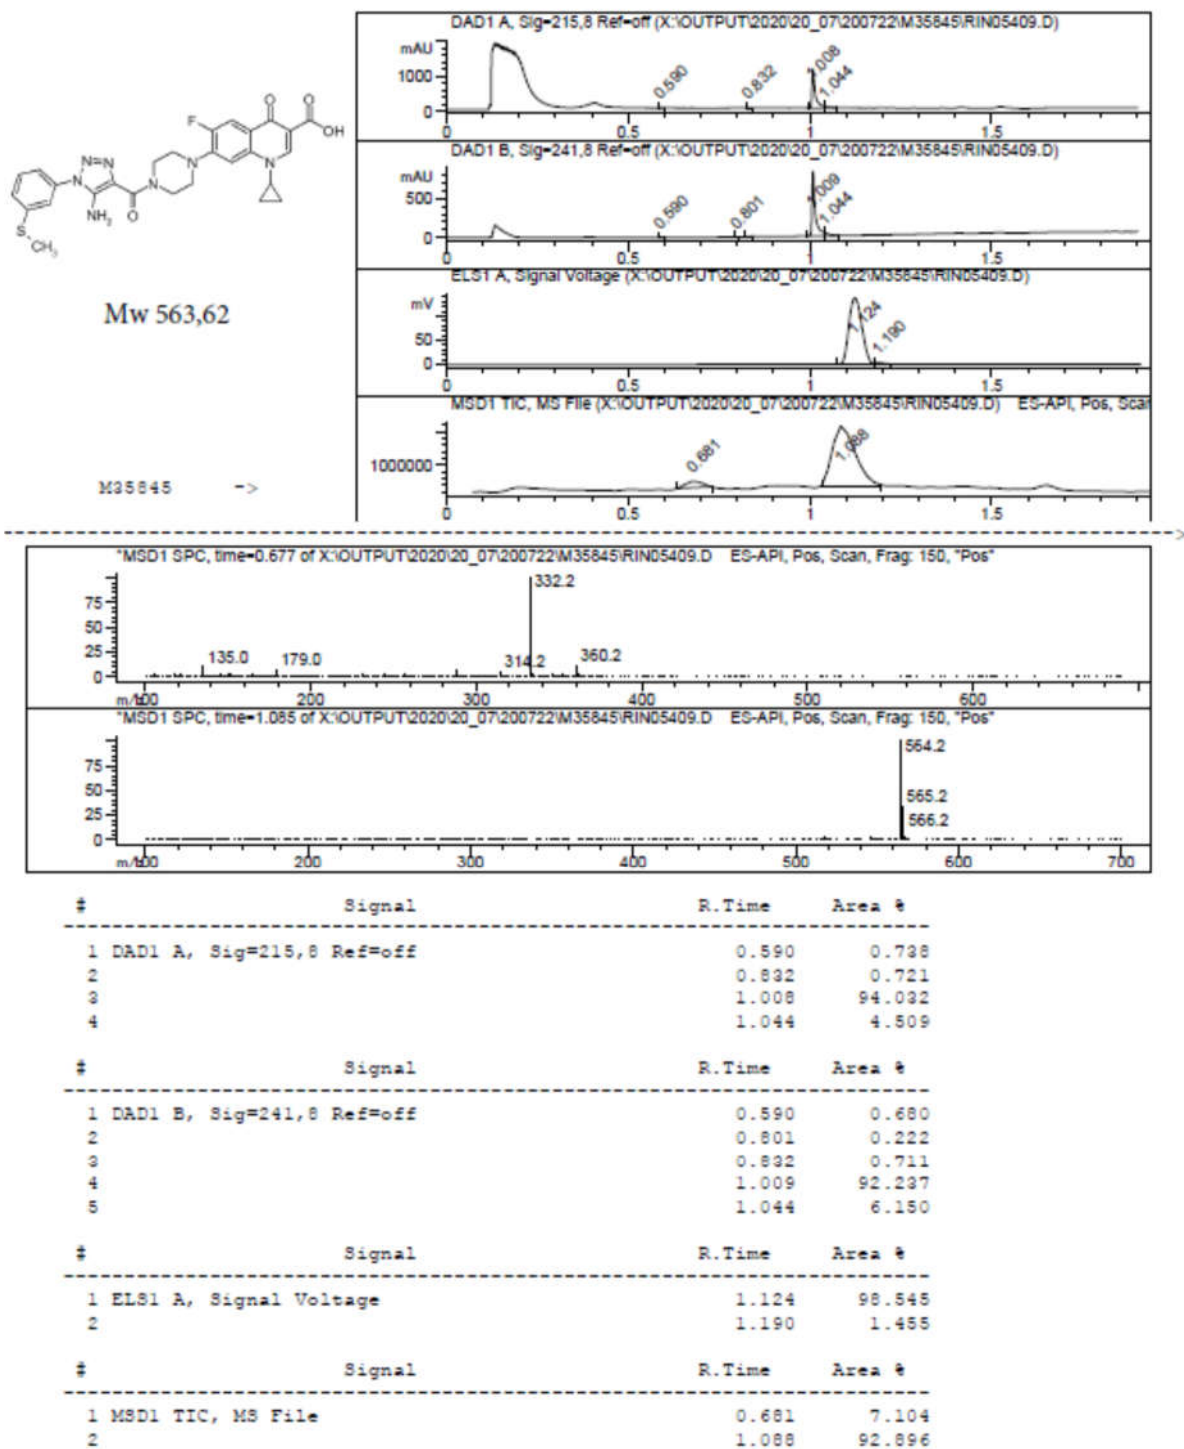

**Figure S50.** LC/MS data for 7-(4-(5-amino-1-(3-(methylthio)phenyl)-1H-1,2,3-triazole-4-carbonyl)piperazin-1-yl)-1-cyclopropyl-6-fluoro-4-oxo-1,4-dihydroquinoline-3-carboxylic acid **2i**

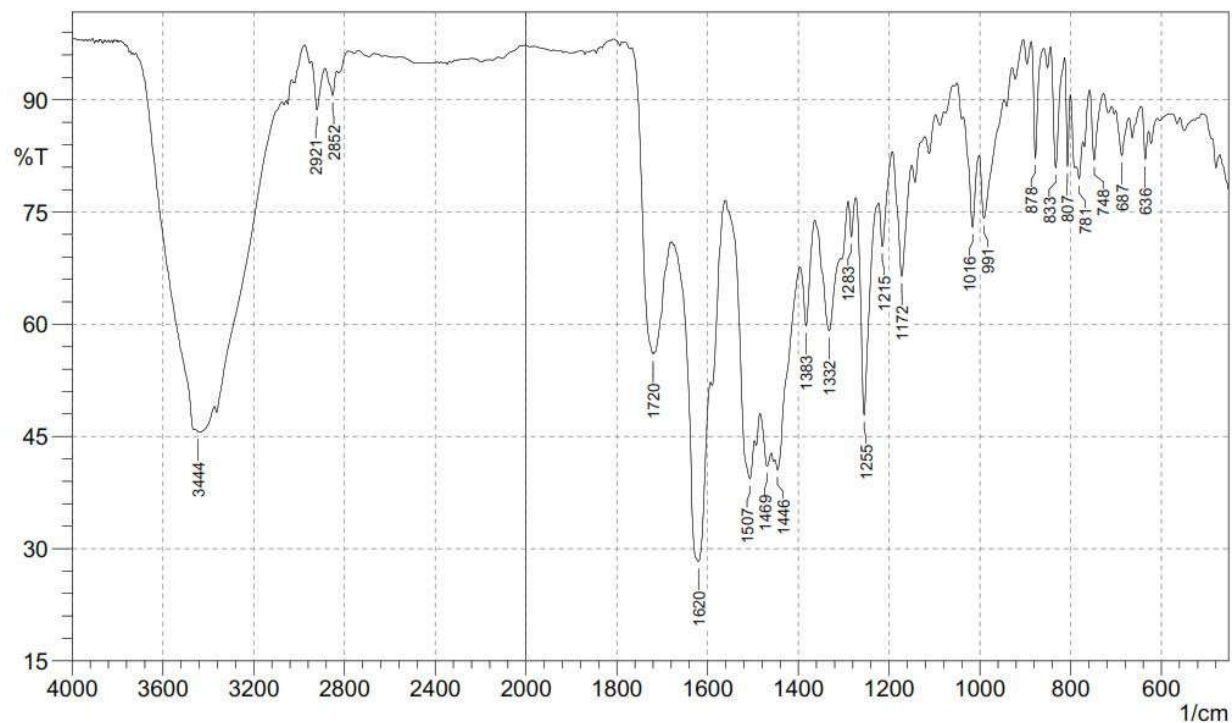

**Figure S51.** IR spectrum of 7-(4-(5-amino-1-(3-(methylthio)phenyl)-1H-1,2,3-triazole-4-carbonyl)piperazin-1-yl)-1-cyclopropyl-6-fluoro-4-oxo-1,4-dihydroquinoline-3-carboxylic acid **2i**

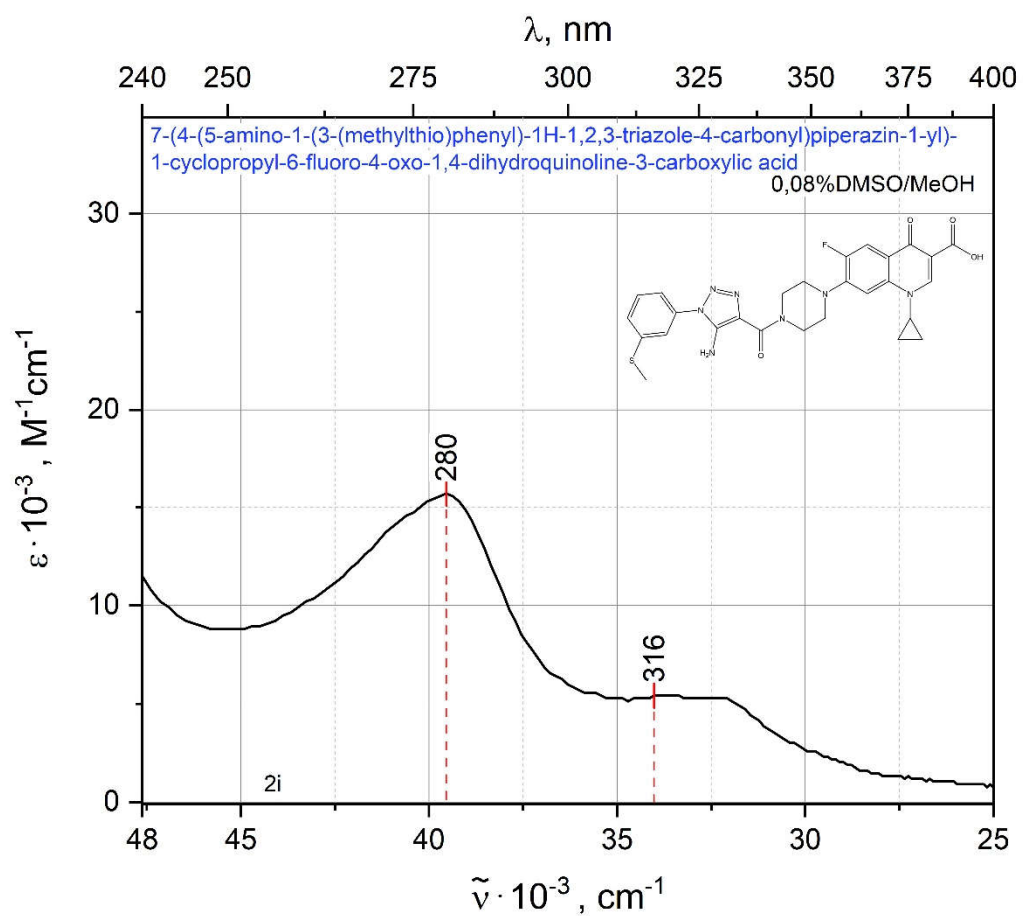

**Figure S52.** UV/Vis spectrum of 7-(4-(5-amino-1-(3-(methylthio)phenyl)-1H-1,2,3-triazole-4-carbonyl)piperazin-1-yl)-1-cyclopropyl-6-fluoro-4-oxo-1,4-dihydroquinoline-3-carboxylic acid **2i** (0.08% DMSO/MeOH)

**7-(4-(5-amino-1-(4-bromophenyl)-1H-1,2,3-triazole-4-carbonyl)piperazin-1-yl)-1-cyclopropyl-6-fluoro-4-oxo-1,4-dihydroquinoline-3-carboxylic acid 2j**

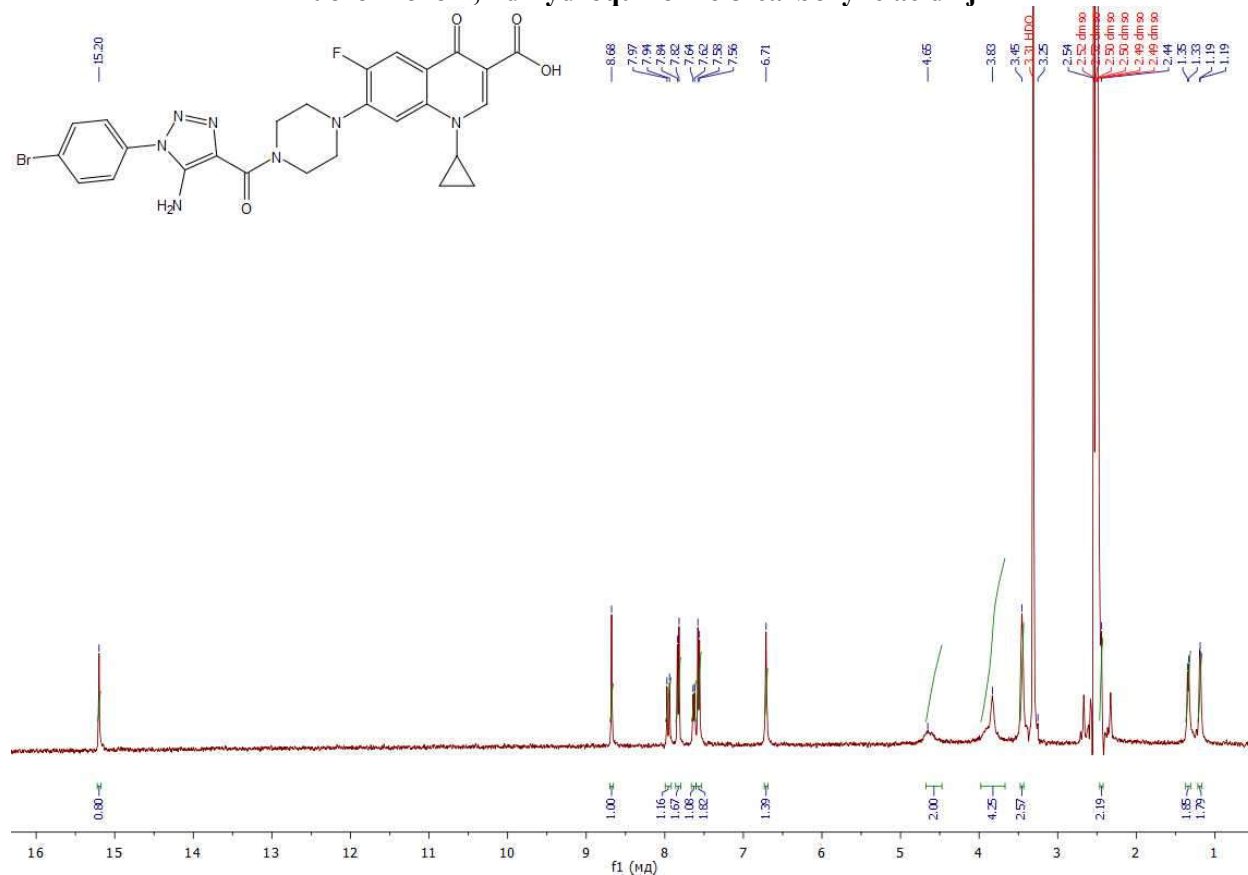

**Figure S53.**  $^1\text{H}$  NMR spectrum (400 MHz, DMSO- $d_6$ ) of 7-(4-(5-amino-1-(4-bromophenyl)-1H-1,2,3-triazole-4-carbonyl)piperazin-1-yl)-1-cyclopropyl-6-fluoro-4-oxo-1,4-dihydroquinoline-3-carboxylic acid 2j

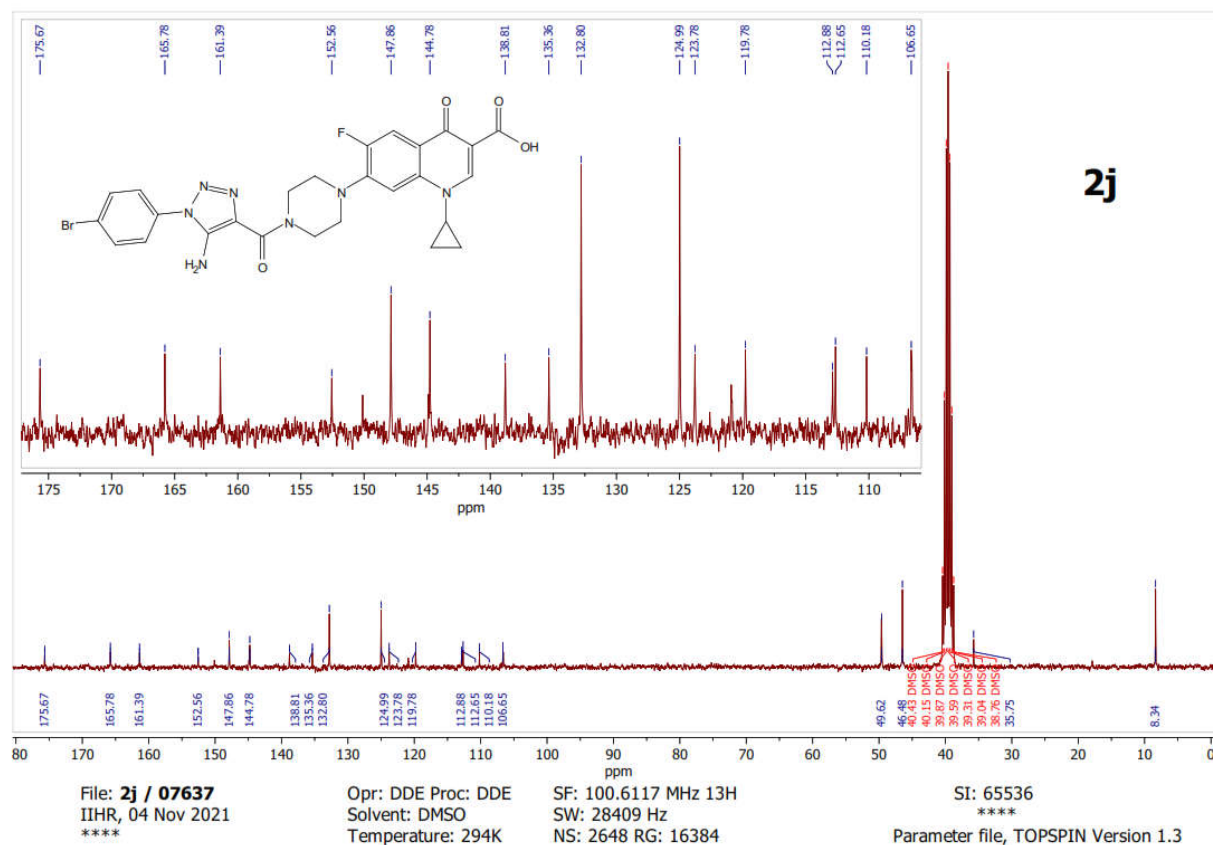

**Figure S54.**  $^{13}\text{C}$  NMR spectrum (100 MHz, DMSO- $d_6$ ) of 7-(4-(5-amino-1-(4-bromophenyl)-1H-1,2,3-triazole-4-carbonyl)piperazin-1-yl)-1-cyclopropyl-6-fluoro-4-oxo-1,4-dihydroquinoline-3-carboxylic acid **2j**

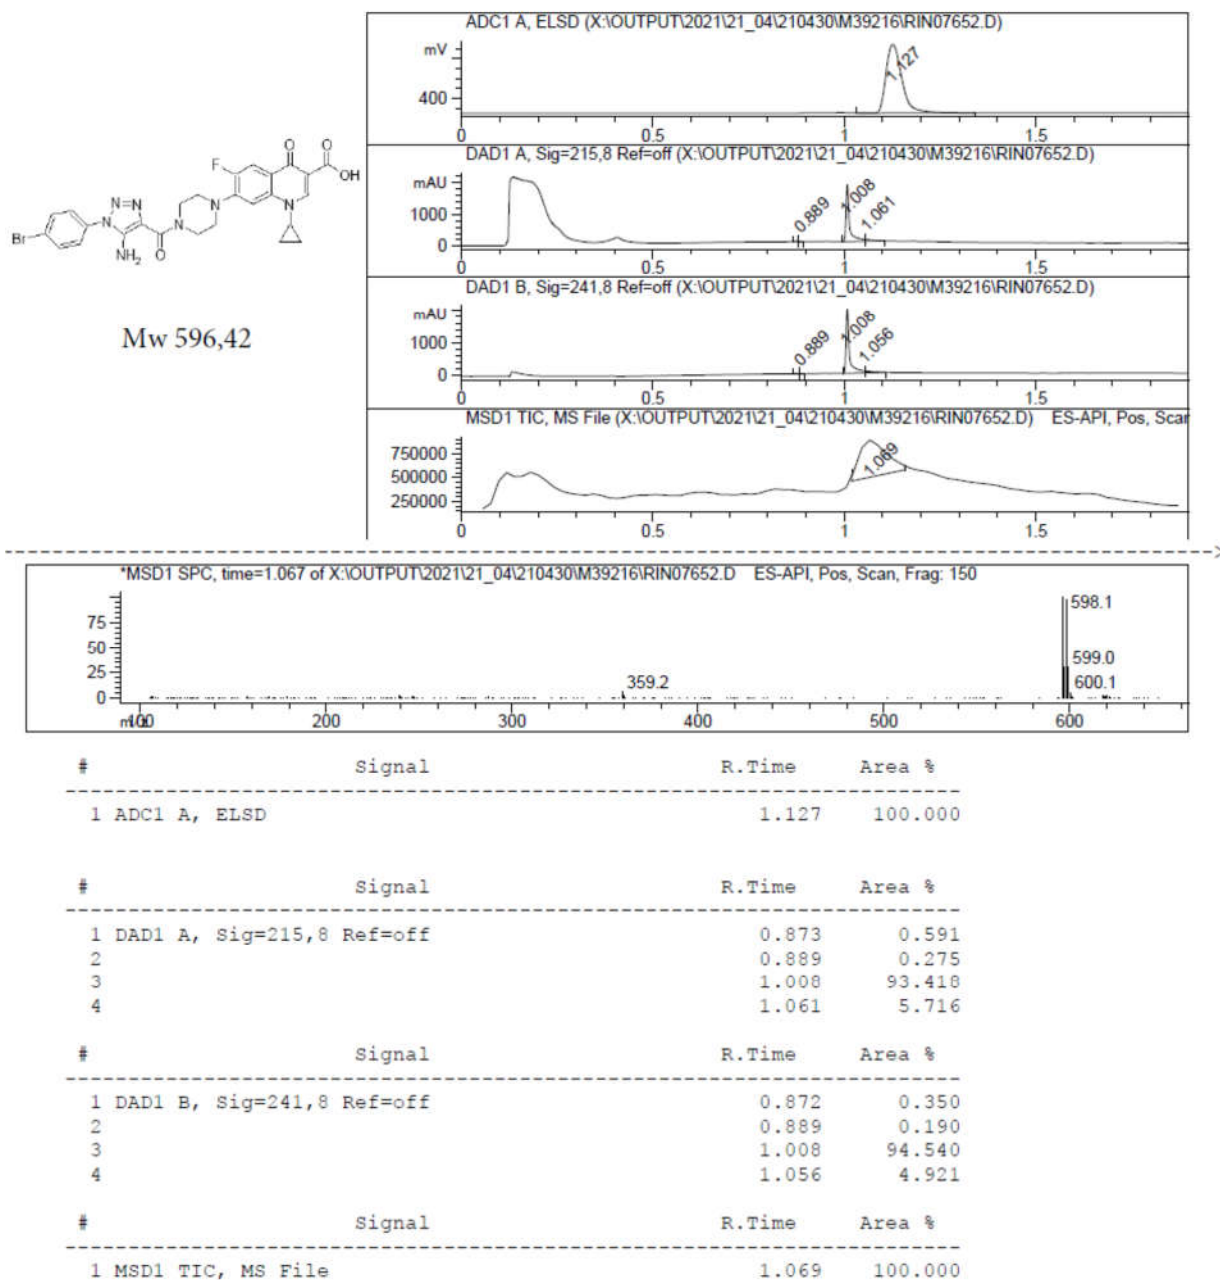

**Figure S55.** LC/MS data for 7-(4-(5-amino-1-(4-bromophenyl)-1H-1,2,3-triazole-4-carbonyl)piperazin-1-yl)-1-cyclopropyl-6-fluoro-4-oxo-1,4-dihydroquinoline-3-carboxylic acid **2j**



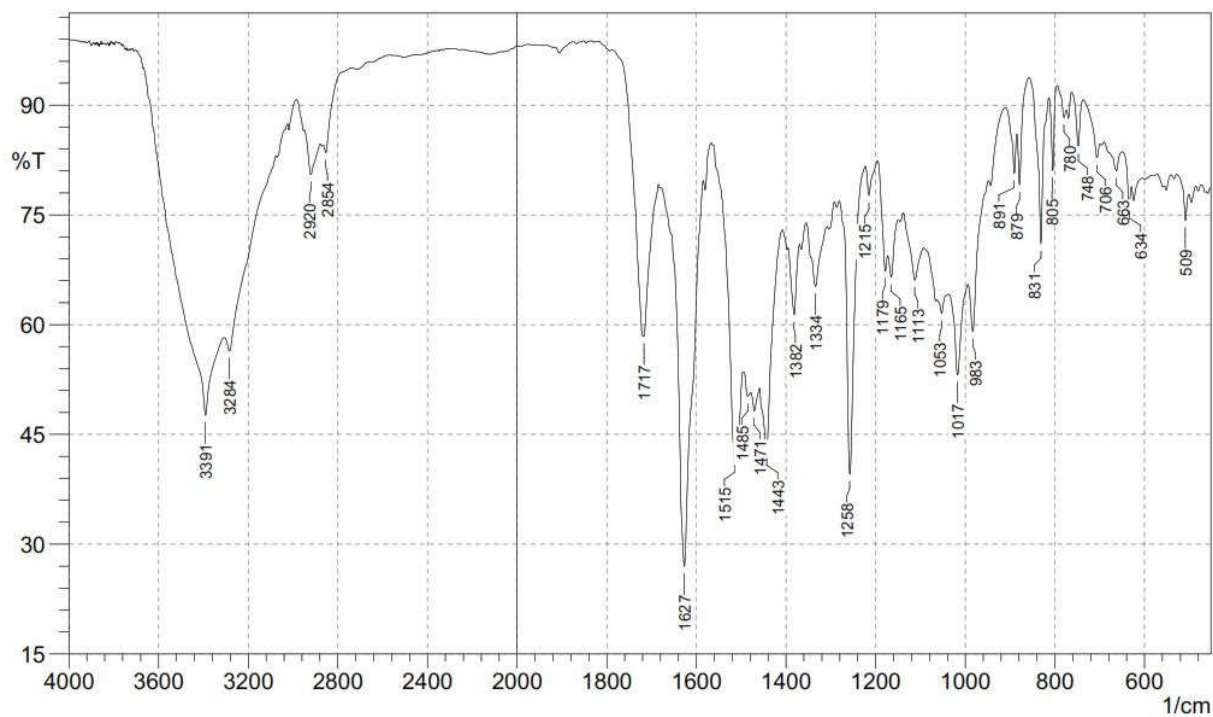

**Figure S56.** IR spectrum of 7-(4-(5-amino-1-(4-bromophenyl)-1H-1,2,3-triazole-4-carbonyl)piperazin-1-yl)-1-cyclopropyl-6-fluoro-4-oxo-1,4-dihydroquinoline-3-carboxylic acid **2j**

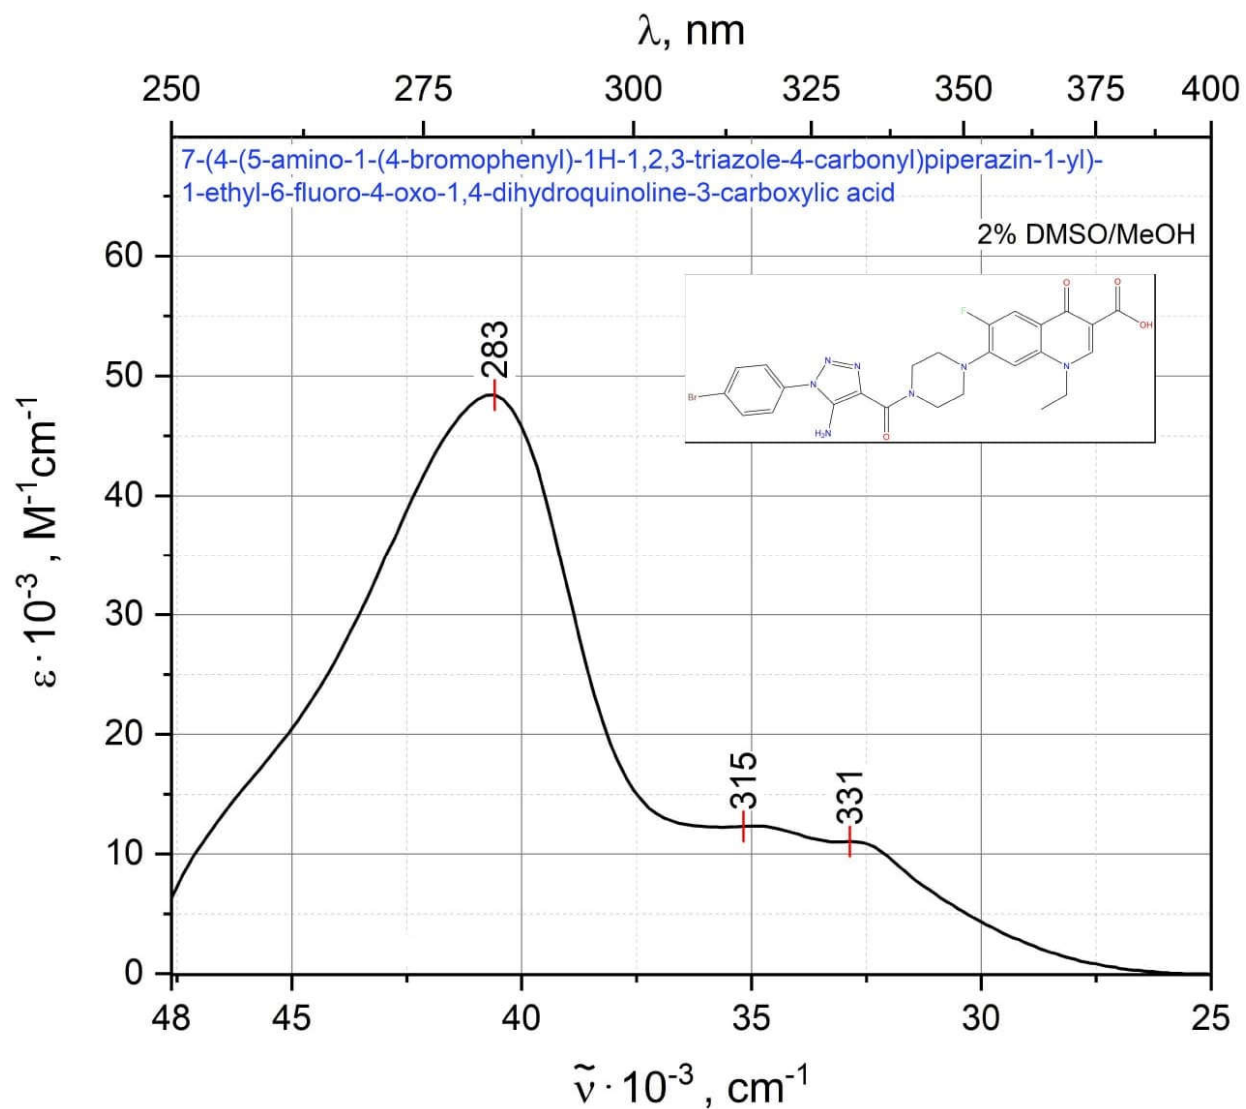

**Figure S57.** UV/Vis spectrum of 7-(4-(5-amino-1-(4-bromophenyl)-1H-1,2,3-triazole-4-carbonyl)piperazin-1-yl)-1-cyclopropyl-6-fluoro-4-oxo-1,4-dihydroquinoline-3-carboxylic acid **2j** (2%DMSO/MeOH)

**7-(4-(5-amino-1-(5-fluoro-2-methylphenyl)-1H-1,2,3-triazole-4-carbonyl)piperazin-1-yl)-1-cyclopropyl-6-fluoro-4-oxo-1,4-dihydroquinoline-3-carboxylic acid **2k****

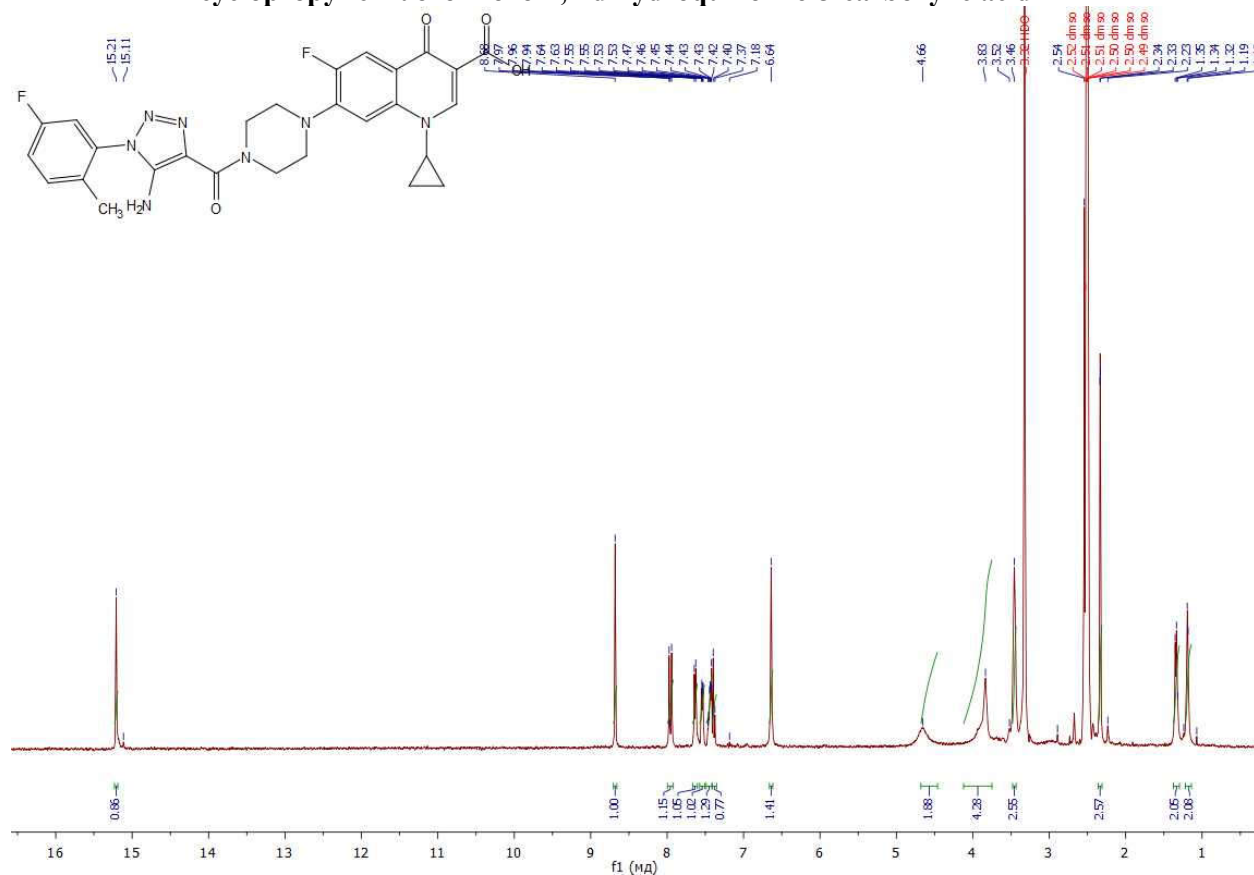

**Figure S58.** <sup>1</sup>H NMR spectrum (400 MHz, DMSO-d<sub>6</sub>) of 7-(4-(5-amino-1-(5-fluoro-2-methylphenyl)-1H-1,2,3-triazole-4-carbonyl)piperazin-1-yl)-1-cyclopropyl-6-fluoro-4-oxo-1,4-dihydroquinoline-3-carboxylic acid **2k**

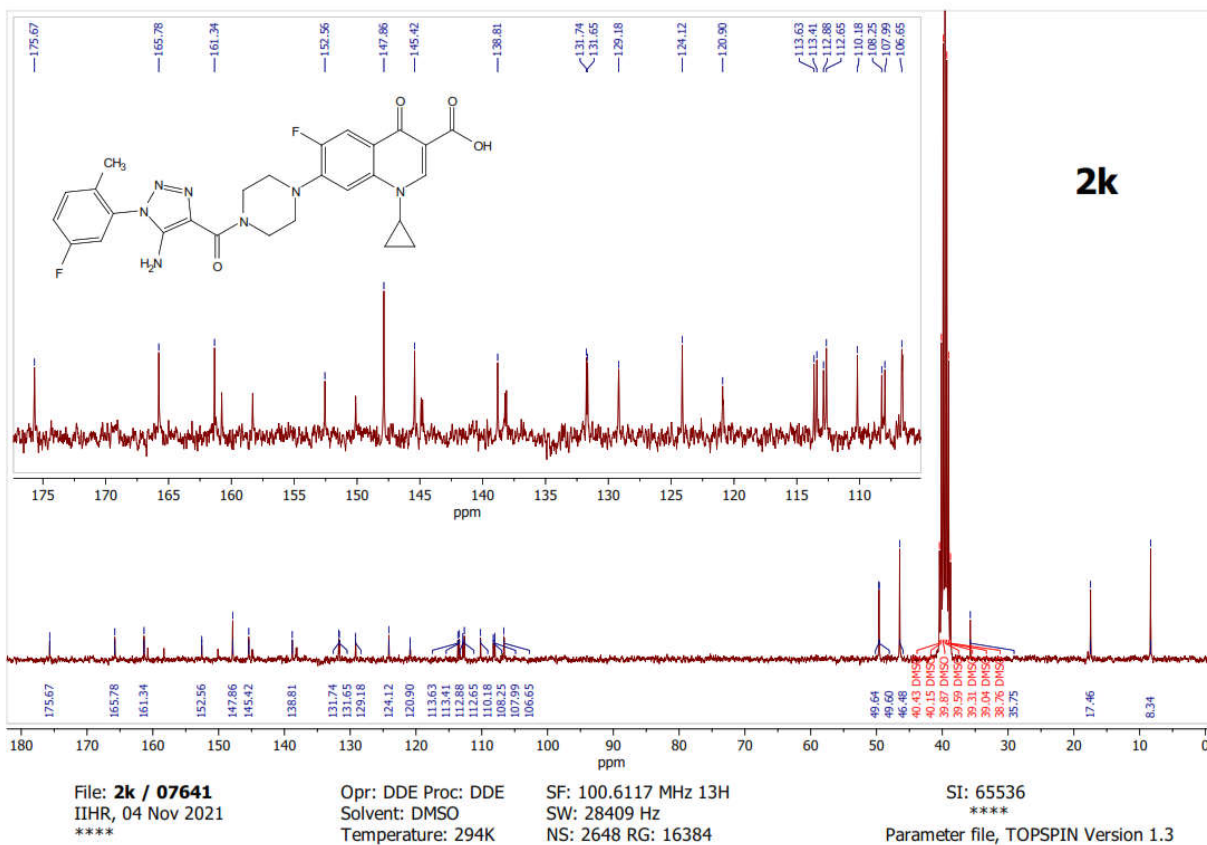

**Figure S59.** <sup>13</sup>C NMR spectrum (100 MHz, DMSO-d<sub>6</sub>) of 7-(4-(5-amino-1-(5-fluoro-2-methylphenyl)-1H-1,2,3-triazole-4-carbonyl)piperazin-1-yl)-1-cyclopropyl-6-fluoro-4-oxo-1,4-dihydroquinoline-3-carboxylic acid **2k**

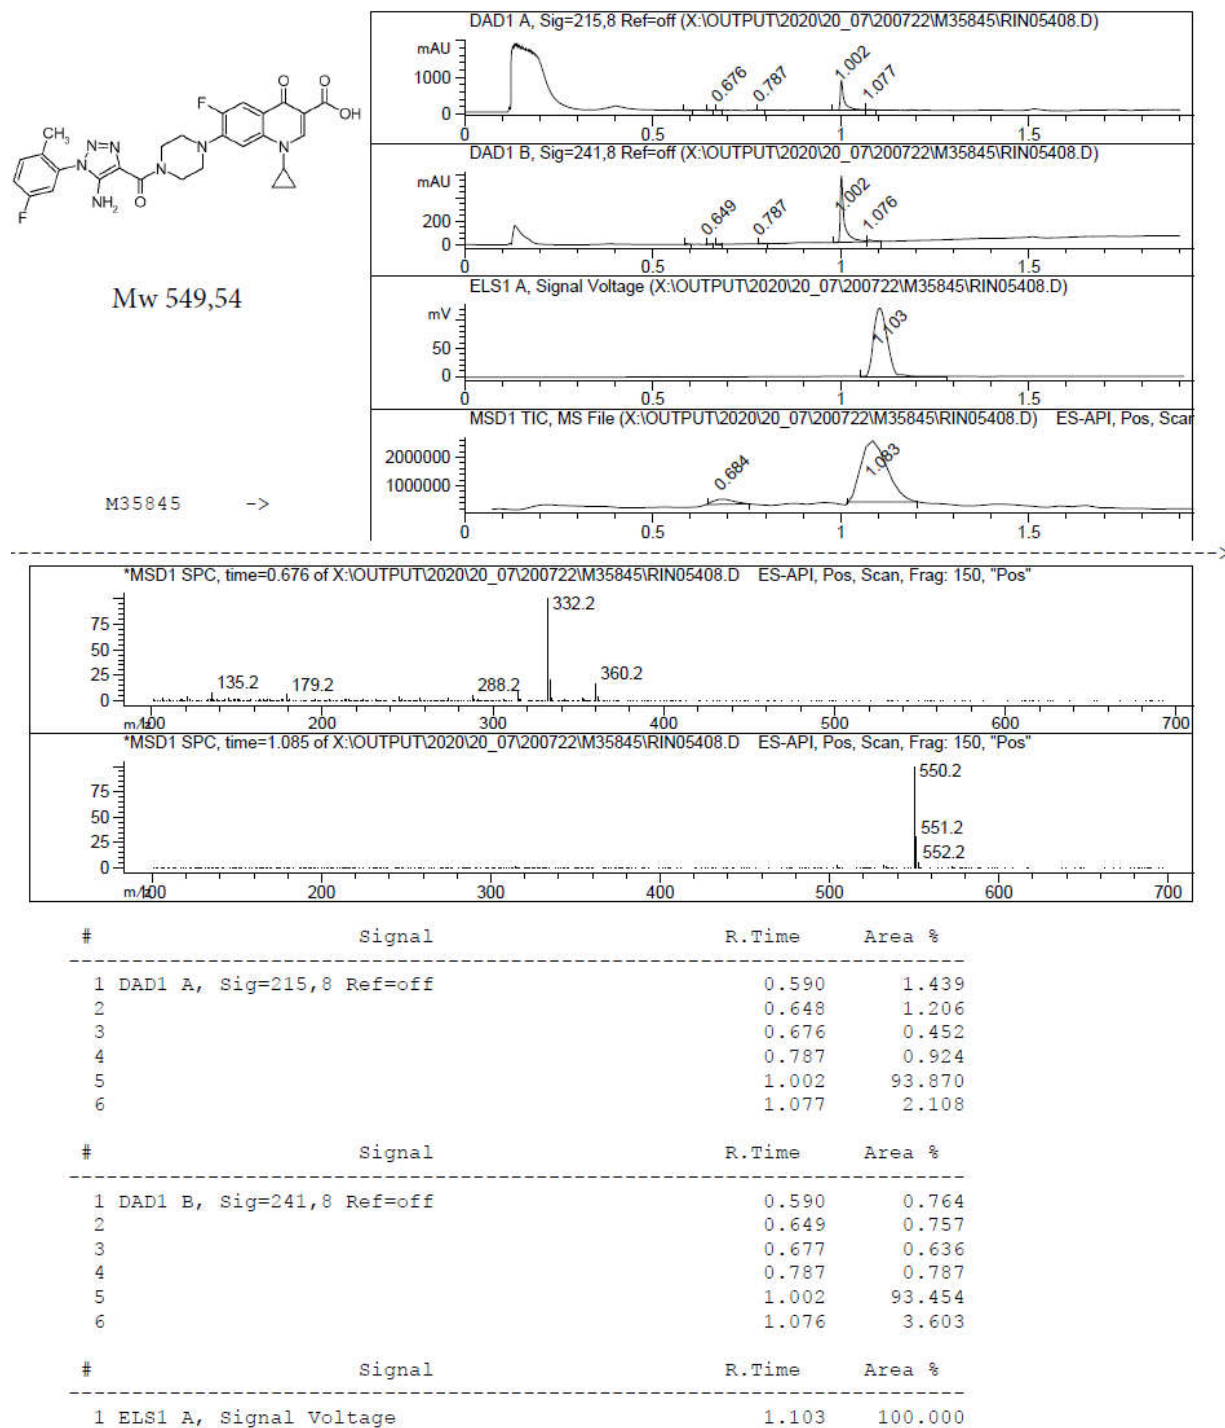

**Figure S60.** LC/MS data for 7-(4-(5-amino-1-(5-fluoro-2-methylphenyl)-1H-1,2,3-triazole-4-carbonyl)piperazin-1-yl)-1-cyclopropyl-6-fluoro-4-oxo-1,4-dihydroquinoline-3-carboxylic acid **2k**

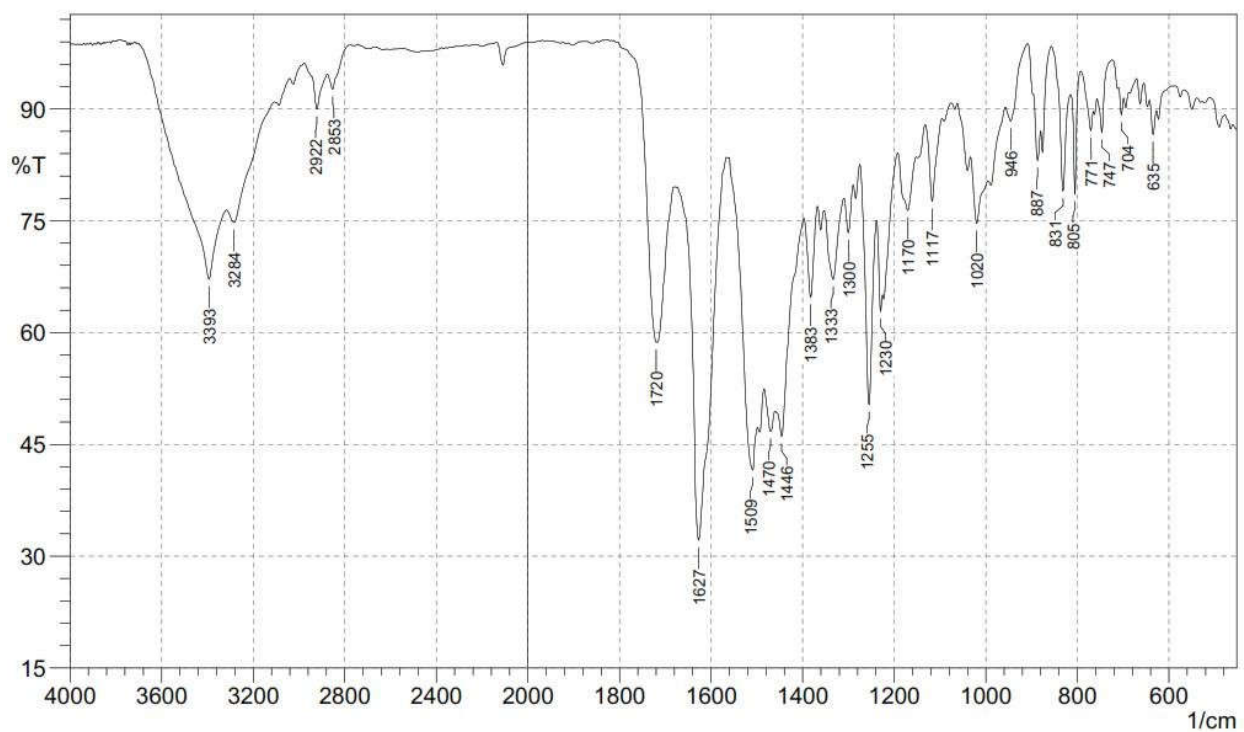

**Figure S61.** IR spectrum of 7-(4-(5-amino-1-(5-fluoro-2-methylphenyl)-1H-1,2,3-triazole-4-carbonyl)piperazin-1-yl)-1-cyclopropyl-6-fluoro-4-oxo-1,4-dihydroquinoline-3-carboxylic acid **2k**

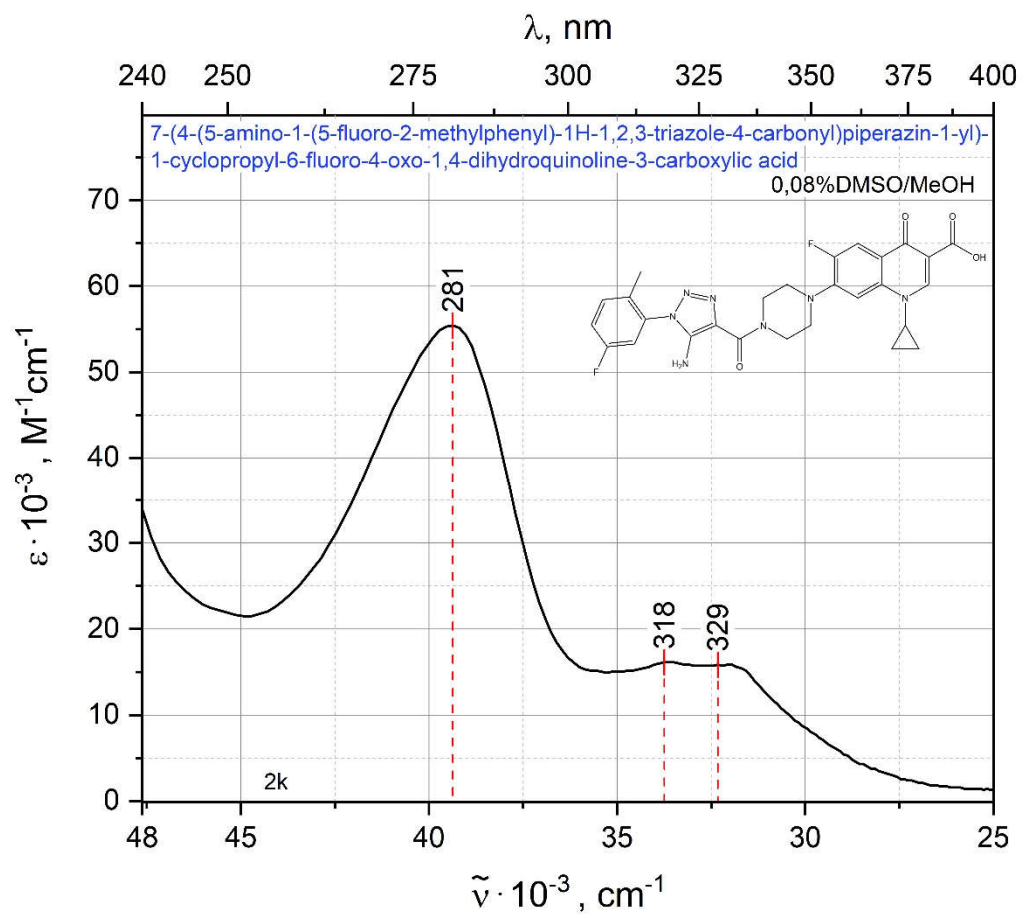

**Figure S62.** UV/Vis spectrum of 7-(4-(5-amino-1-(5-fluoro-2-methylphenyl)-1H-1,2,3-triazole-4-carbonyl)piperazin-1-yl)-1-cyclopropyl-6-fluoro-4-oxo-1,4-dihydroquinoline-3-carboxylic acid **2k** (0.08% DMSO/MeOH)

7-(4-(5-amino-1-(4-(trifluoromethyl)phenyl)-1H-1,2,3-triazole-4-carbonyl)piperazin-1-yl)-1-cyclopropyl-6-fluoro-4-oxo-1,4-dihydroquinoline-3-carboxylic acid **21**

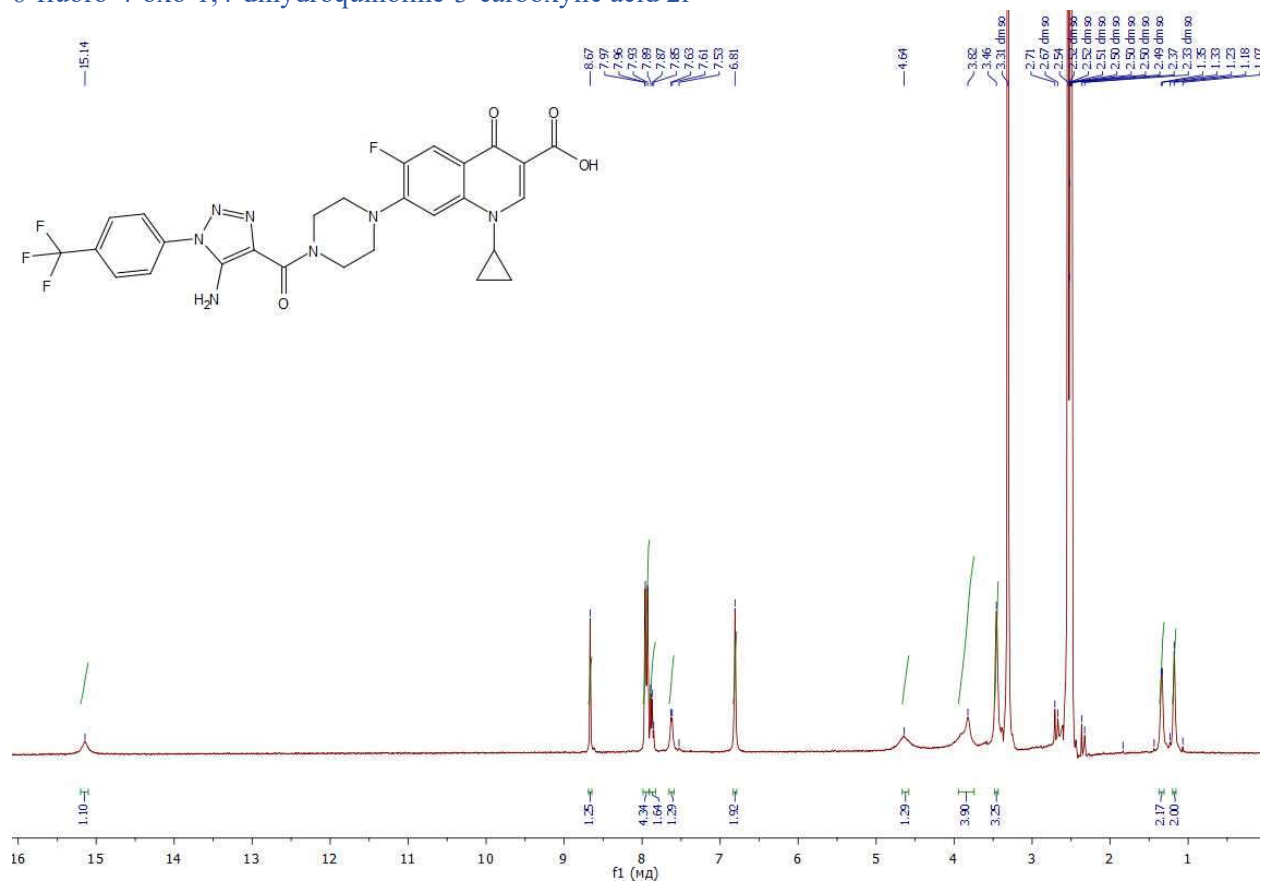

**Figure S63.** <sup>1</sup>H NMR spectrum (400 MHz, DMSO-d<sub>6</sub>) of 7-(4-(5-amino-1-(4-(trifluoromethyl)phenyl)-1H-1,2,3-triazole-4-carbonyl)piperazin-1-yl)-1-cyclopropyl-6-fluoro-4-oxo-1,4-dihydroquinoline-3-carboxylic acid **21**



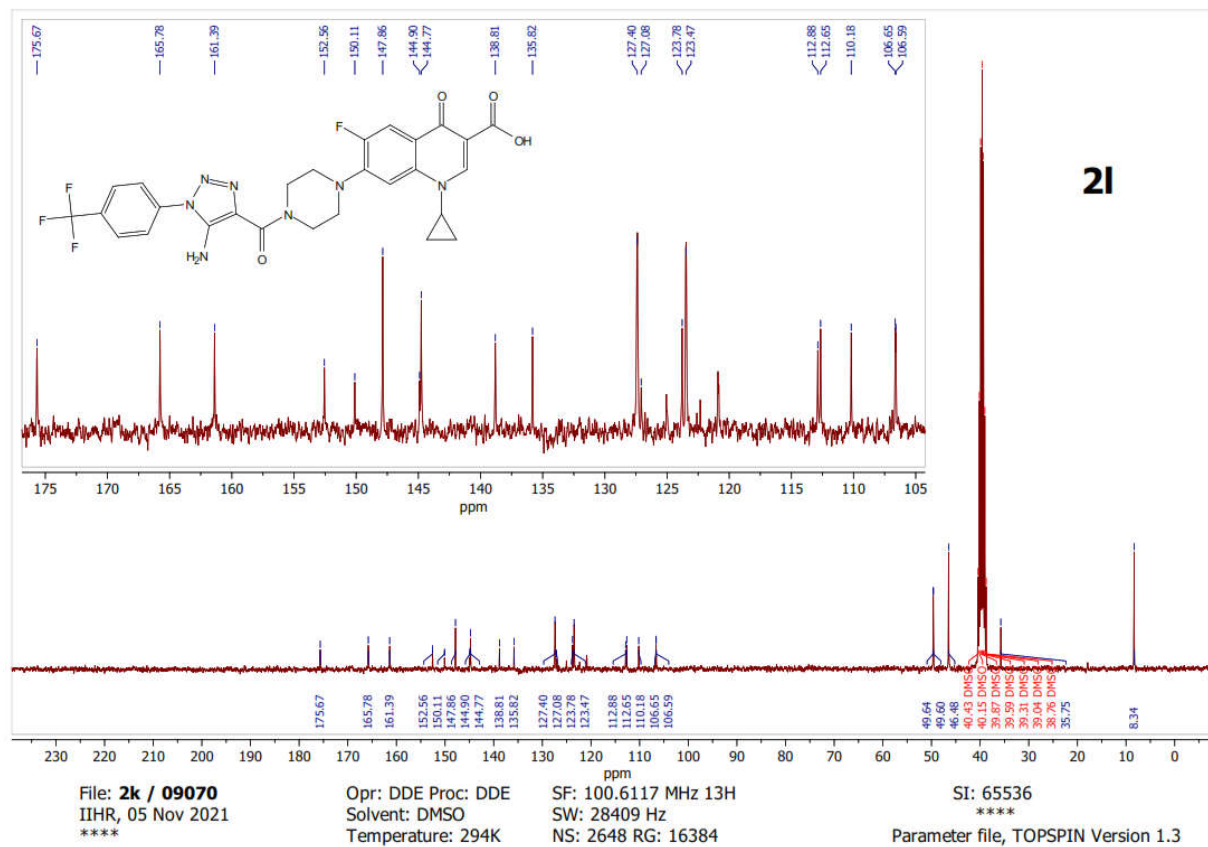

**Figure S64.** <sup>13</sup>C NMR spectrum (100 MHz, DMSO-d<sub>6</sub>) of 7-(4-(5-amino-1-(4-(trifluoromethyl)phenyl)-1H-1,2,3-triazole-4-carbonyl)piperazin-1-yl)-1-cyclopropyl-6-fluoro-4-oxo-1,4-dihydroquinoline-3-carboxylic acid **2l**

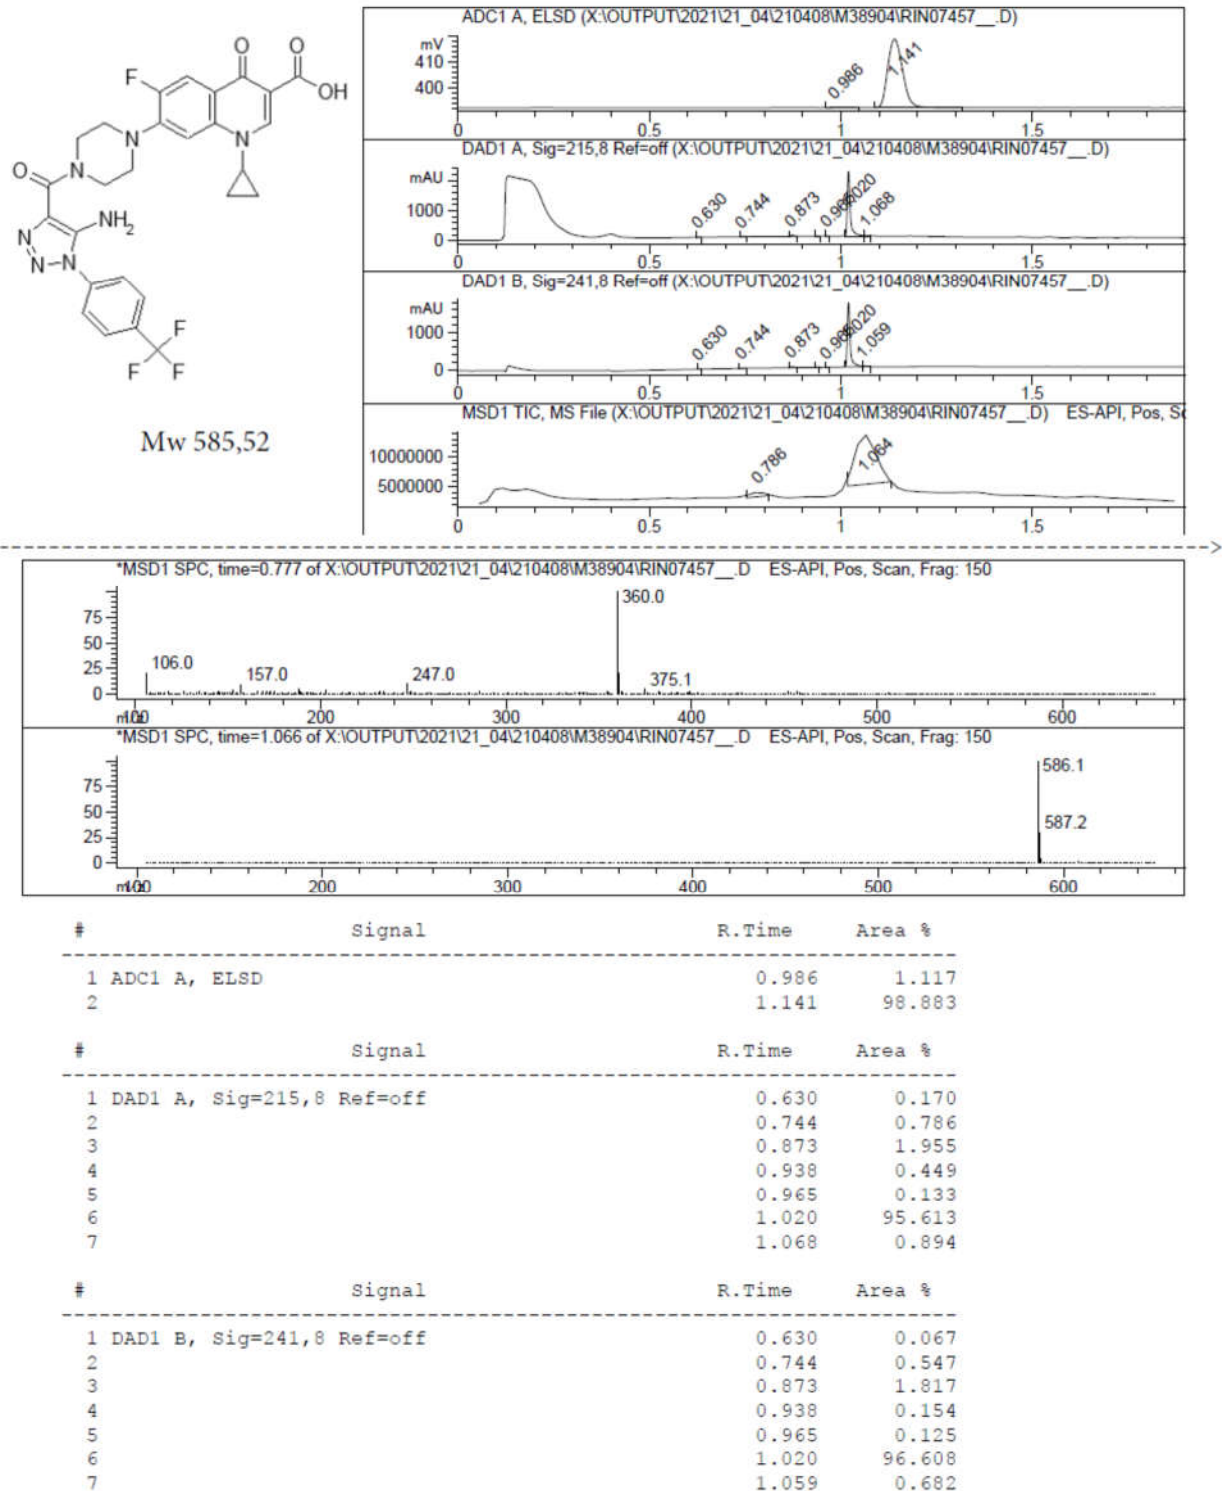

**Figure S65.** LC/MS data for 7-(4-(5-amino-1-(4-(trifluoromethyl)phenyl)-1H-1,2,3-triazole-4-carbonyl)piperazin-1-yl)-1-cyclopropyl-6-fluoro-4-oxo-1,4-dihydroquinoline-3-carboxylic acid **21**

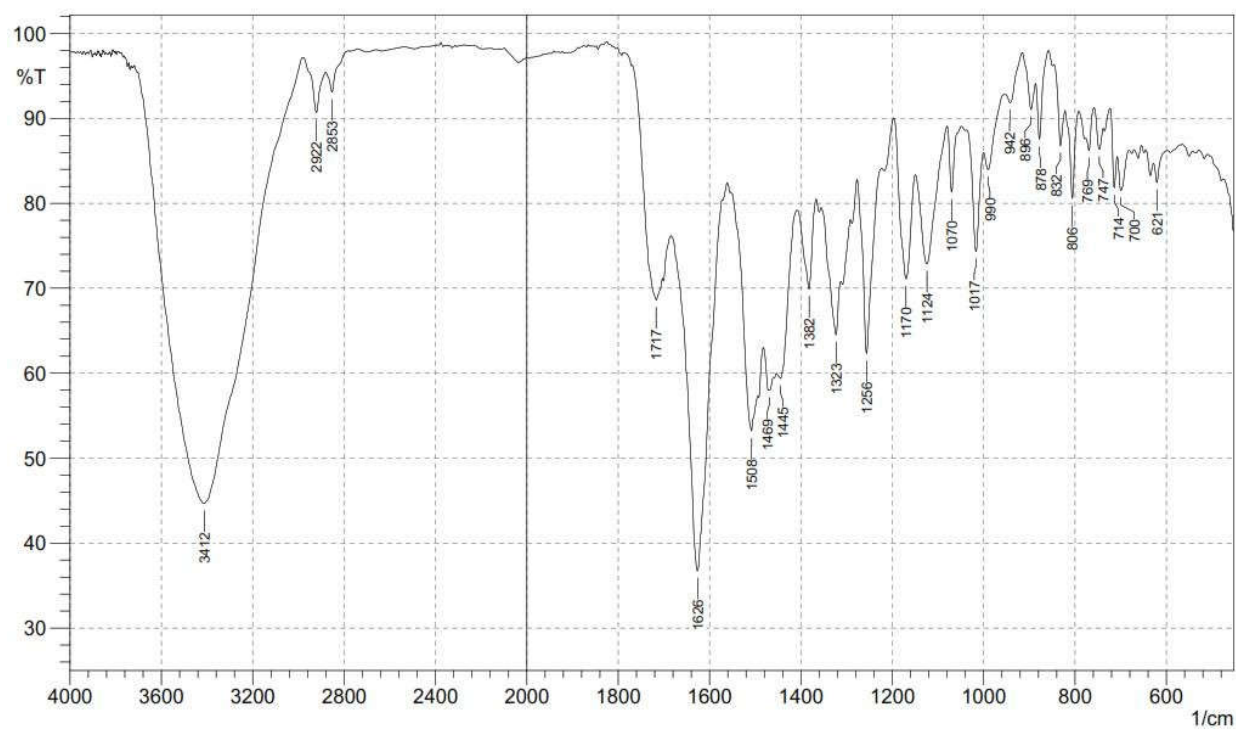

**Figure S66.** IR spectrum of 7-(4-(5-amino-1-(4-(trifluoromethyl)phenyl)-1H-1,2,3-triazole-4-carbonyl)piperazin-1-yl)-1-cyclopropyl-6-fluoro-4-oxo-1,4-dihydroquinoline-3-carboxylic acid **2I**

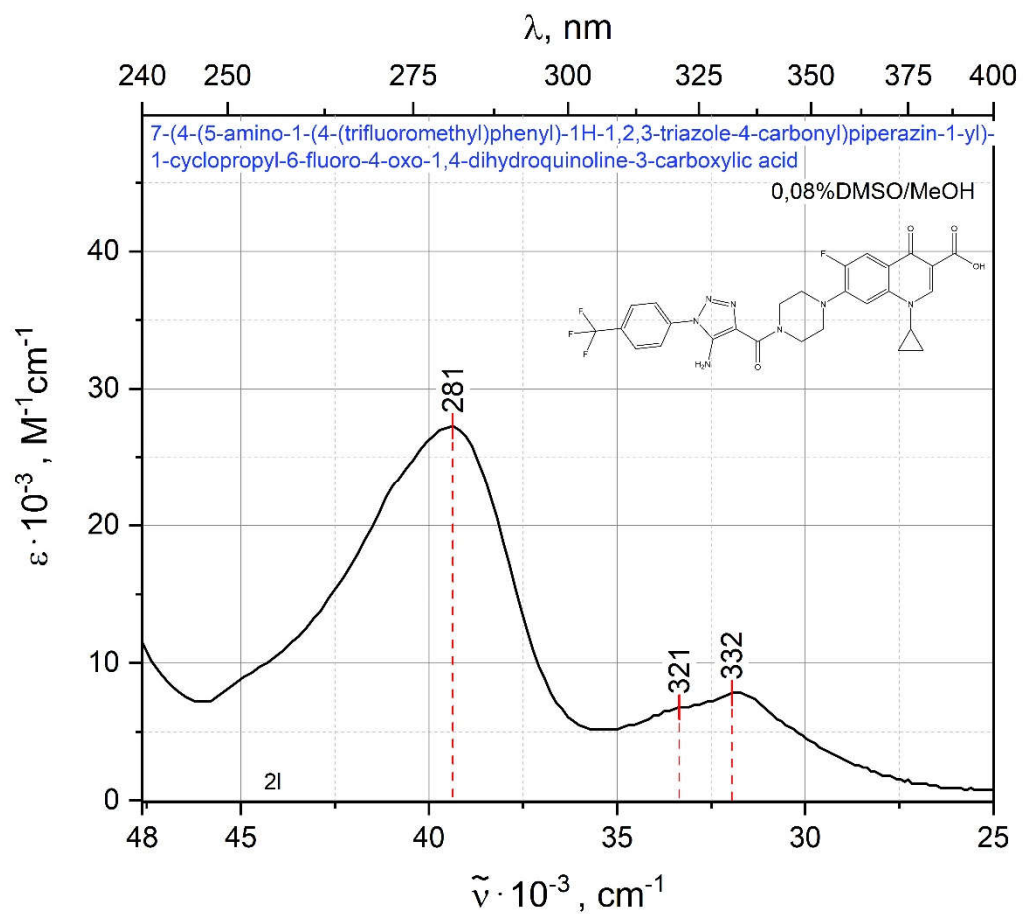

**Figure S67.** UV/Vis spectrum of 7-(4-(5-amino-1-(4-(trifluoromethyl)phenyl)-1H-1,2,3-triazole-4-carbonyl)piperazin-1-yl)-1-cyclopropyl-6-fluoro-4-oxo-1,4-dihydroquinoline-3-carboxylic acid **2I** (0,08% DMSO/MeOH)
